# Supplementary material for: Fe-Catalyzed dicarbofunctionalization of electron-rich alkenes with Grignard reagents and (fluoro)alkyl halides
Source: Royal Society of Chemistry journal article supplement (doi:10.1039/d1cc04619e), 2021-01-01

## **Fe-Catalyzed Dicarbofunctionalization of Electron-Rich Alkenes with Grignard Reagents and (Fluoro)Alkyl Halides**

Madeline E. Rotella,<sup>#a</sup> Dinabandhu Sar,<sup>#a,b</sup> Lei Liu,<sup>a,b</sup> and Osvaldo Gutierrez<sup>\*a,b</sup>

*<sup>a</sup>Department of Chemistry and Biochemistry, University of Maryland, College Park, Maryland 20742, United States*

*<sup>b</sup>Department of Chemistry, Texas A&M University, College Station, Texas 77843, United States*  
[og.labs@tamu.edu](mailto:og.labs@tamu.edu)

### ***Supporting Information***

## Table of Contents

|                                                                                |         |
|--------------------------------------------------------------------------------|---------|
| 1. General Considerations                                                      | S3      |
| 2. General Procedure for Iron-Catalyzed Multicomponent Cross-Coupling Reaction | S3-S4   |
| 3. Synthesis of 1-chloro-4-(vinylloxy)benzene                                  | S5      |
| 4. Screening of Reaction Conditions                                            | S6-S13  |
| 5. Substrate Limitations                                                       | S14     |
| 6. Product Characterization Data                                               | S15-S35 |
| 7. References                                                                  | S35     |
| 8. Spectral Data                                                               | S36-S70 |

## 1. General Considerations

All non-aqueous reactions were carried out under a nitrogen atmosphere in oven- (120 °C) or flame-dried glassware. When necessary, solvents and reagents were dried prior to use. Tetrahydrofuran (THF) was dried by passage through activated alumina in Inert's PureSolv PS-MD-3 solvent purification system. All reagent grade solvents were purchased from VWR, Sigma-Aldrich, or Fisher and Organometallic reagents were purchased from Sigma-Aldrich. Analytical thin layer chromatography (TLC) was performed on Silicycle 250  $\mu\text{m}$  silica-gel F-254 plates. Silica gel (230-400 mesh) was used for column chromatography. NMR ( $^1\text{H}$ ,  $^{13}\text{C}$  and  $^{19}\text{F}$ ) spectra were recorded on Bruker AV III HD NanoBay (400 MHz) NMR spectrometer. Chemical shifts ( $\delta$ ) are reported in parts per million (ppm) relative to the internal residual solvent resonance peak  $\delta$  7.26 ( $\text{CDCl}_3$ ) and  $\delta$  0.00 (TMS) for all  $^1\text{H}$  and  $\delta$  77.16 ( $\text{CDCl}_3$ ) and  $\delta$  0.00 (TMS) for all  $^{13}\text{C}$ . Other data are reported as follows: chemical shift, multiplicity (s = singlet, d = doublet, t = triplet, q = quartet, m = multiplet, dd = doublet of doublets), coupling constants ( $J$ ) are reported in Hertz (Hz), and number of protons. High Resolution Mass (HRMS) spectra using DART mode were recorded on JEOL AccuTOF-CS. Agilent 7820A GC system and 5977B MSD was used to measure GC-MS. IR spectra were recorded on a Thermo Nicolet NEXUS 670 FTIR and are reported in wavenumbers ( $\text{cm}^{-1}$ ). Enantiomeric ratio (er) values were determined by HPLC with the Daicel Chiralcel OJ-H column (Hexane/*i*-PrOH 99.5:0.5, 0.7 mL/min, 214 nm). Melting points were obtained and are uncorrected.

## 2. General Procedure for Iron-Catalyzed Multicomponent Cross-Coupling Reaction

### Procedure 1: Iron-Catalyzed Cross-Coupling Reaction

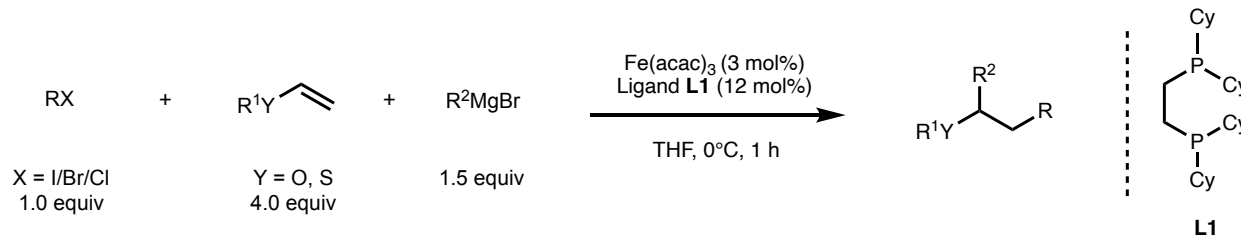

**Standard-scale:** A flame-dried 5 mL microwave vial with a stir bar was transferred into an argon-filled glovebox and the vial was charged with  $\text{Fe}(\text{acac})_3$  (2.1 mg, 3 mol %), 1,2-bis(dicyclohexylphosphanyl)ethane **L1** (10.1 mg, 12 mol %), alkyl halide (0.2 mmol, 1.0 equiv.) and alkene (0.8 mmol, 4.0 equiv.) (using oven-dried glass pipette to transfer alkyl halide and alkene

to the vial). The vial was sealed with a Teflon cap and brought out of the glovebox without solvent. THF (0.2 mL) was then added into the reaction mixture. The resulting red solution was stirred at room temperature for 5 min. The reaction mixture was then cooled to 0 °C and a R<sup>2</sup>MgBr solution (0.5–1.0 M solution in THF, 1.5 equiv.) was added slowly for 1 h using a syringe pump. Over which time the heterogeneous solution turned from red to colorless or yellow, brown, grass green or orange color (depending on R<sup>2</sup>MgBr and substrate). The resulting reaction mixture was then stirred at 0 °C for an additional 10 min. After completion, reaction mixture was quenched with a 1.0 M aqueous solution of hydrochloric acid (0.5 mL) and water (0.5 mL) and then extracted with ethyl acetate (3 x 2 mL). The combined organic solution was filtered through a short pad of silica and evaporation of solvent gave a residue that was purified on silica gel column chromatography with hexane/CH<sub>2</sub>Cl<sub>2</sub> to obtain product.

## Procedure 2: Iron-Catalyzed Enantioselective Cross-Coupling Reaction

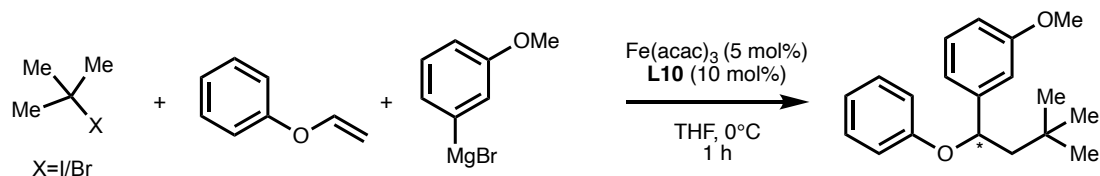

A flame-dried 5 mL microwave vial with a stir bar was transferred into an argon-filled glovebox and the vial was charged with Fe(acac)<sub>3</sub> (3.5 mg, 5 mol %), 1,2-bis(*tert*-butyl(methyl)phosphanyl)benzene **L10** (5.6 mg, 10 mol %), alkyl halide (0.2 mmol, 1.0 equiv.) and alkene (0.8 mmol, 4.0 equiv.) (using oven-dried glass pipette to transfer alkyl halide and alkene to the vial). The vial was sealed with a Teflon cap and brought out of the glovebox without solvent. THF (0.2 mL) was then added into the reaction mixture. The resulting red solution was stirred at room temperature for 5 min. The reaction mixture was then cooled to 0 °C and a 3-methoxyphenyl Grignard solution (1.0 M solution in THF, 1.5 equiv.) was added slowly for 1 h using a syringe pump. The resulting reaction mixture was then stirred at 0 °C for an additional 10 min. After completion, reaction mixture was quenched with a 1.0 M aqueous solution of hydrochloric acid (0.5 mL) and water (0.5 mL) and then extracted with ethyl acetate (3 x 2 mL). The combined organic solution was filtered through a short pad of silica and evaporation of solvent gave a residue that was purified on silica gel column chromatography with hexane/CH<sub>2</sub>Cl<sub>2</sub> to obtain product.

**3. Synthesis of 1-Chloro-4-(vinylloxy)benzene:** In an oven dried round bottom flask, 2-bromoethyl 4-chlorophenyl ether (8.5 mmol, 2.0 g) and potassium *tert*-butoxide (12.1 mmol, 1.36 g) were stirred in dimethyl sulfoxide (29 mL) at room temperature for 2 h under nitrogen atmosphere. After completion of the reaction, the reaction mixture was then diluted with water (10 mL) and extracted with diethyl ether (25 x 2 mL). The organic solution was successively washed with brine (1 x 15 mL) and water (1 x 15 mL). The resulting organic solution was dried over sodium sulfate and then solvent was evaporated by rotary evaporator. The crude residue was then purified on silica gel column chromatography using hexane and dichloromethane (99:1) as an eluent to obtain product (831 mg, 63% yield).

**<sup>1</sup>H NMR (400 MHz, CDCl<sub>3</sub>)**  $\delta$  = 7.29 (d,  $J$  = 8.8 Hz, 2H), 6.95 (d,  $J$  = 9.2 Hz, 2H), 6.58 (dd,  $J$  = 13.6, 6.4 Hz, 1H), 4.76 (dd,  $J$  = 13.6, 2.0 Hz, 1H), 4.46 (dd,  $J$  = 6.0, 2.0 Hz 1H). Spectral data matched with the previously reported compound.<sup>1</sup>

## 4. Screening of Reaction Conditions

**Table S1.** Screening of alkene loading

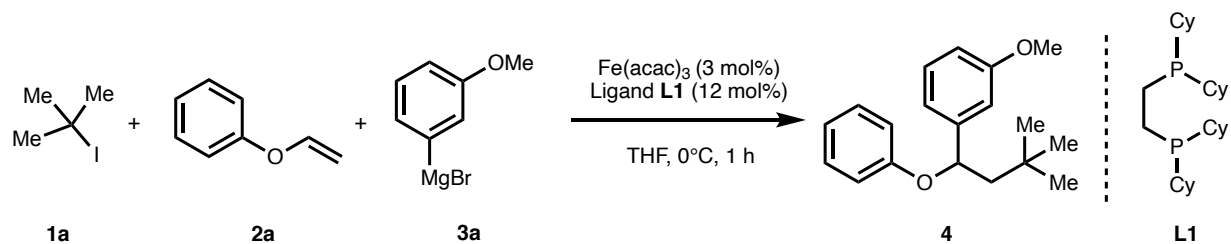

| Entry | <b>1a</b><br>(equiv.) | <b>2a</b><br>(equiv.) | <b>3a</b><br>(equiv.) | Yield (%) | Recovered <b>2a</b><br>(equiv.) |
|-------|-----------------------|-----------------------|-----------------------|-----------|---------------------------------|
| 1     | 1                     | 14                    | 1.5                   | 89        | 12.4                            |
| 2     | 1                     | 8                     | 1.5                   | 81        | 5.1                             |
| 3     | 1                     | 4                     | 1.5                   | 75        | 2.4                             |
| 4     | 1                     | 3                     | 1.5                   | 44        | 1.94                            |
| 5     | 1                     | 2                     | 1.5                   | 44        | 0.68                            |
| 6     | 2                     | 1                     | 1.5                   | 33        | 0.48                            |

Reactions were performed with a 0.10 mmol scale, THF (0.1 mL) and Grignard addition for 1 h at 0 °C. Reactions were then stirred additional 10 min after Grignard addition. Yield and recovered **2a** were determined by crude  $^1\text{H}$  NMR with  $\text{CH}_2\text{Br}_2$  as internal standard.

**Table S2.** Screening of iron salts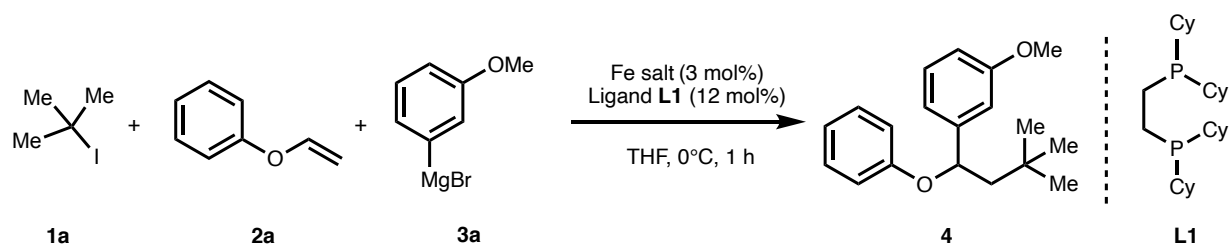

| Entry | <b>1a</b><br>(equiv.) | <b>2a</b><br>(equiv.) | <b>3a</b><br>(equiv.) | Fe salt               | Yield<br>(%) | Recovered <b>2a</b><br>(equiv.) |
|-------|-----------------------|-----------------------|-----------------------|-----------------------|--------------|---------------------------------|
| 1     | 1                     | 4                     | 1.5                   | Fe(acac) <sub>3</sub> | 75           | 2.40                            |
| 2     | 1                     | 4                     | 1.5                   | FeCl <sub>2</sub>     | 69           | 2.36                            |
| 3     | 1                     | 4                     | 1.5                   | FeBr <sub>2</sub>     | 63           | 2.20                            |
| 4     | 1                     | 4                     | 1.5                   | FeCl <sub>3</sub>     | 60           | 2.80                            |
| 5     | 1                     | 4                     | 1.5                   | Fe(OTf) <sub>2</sub>  | 63           | 0.28                            |

Reactions were performed with a 0.10 mmol scale, THF (0.1 mL) and Grignard addition for 1 h at 0 °C. Reactions were then stirred additional 10 min after Grignard addition. Yield and recovered **2a** were determined by crude <sup>1</sup>H NMR with CH<sub>2</sub>Br<sub>2</sub> as internal standard.

**Table S3.** Screening of ligands

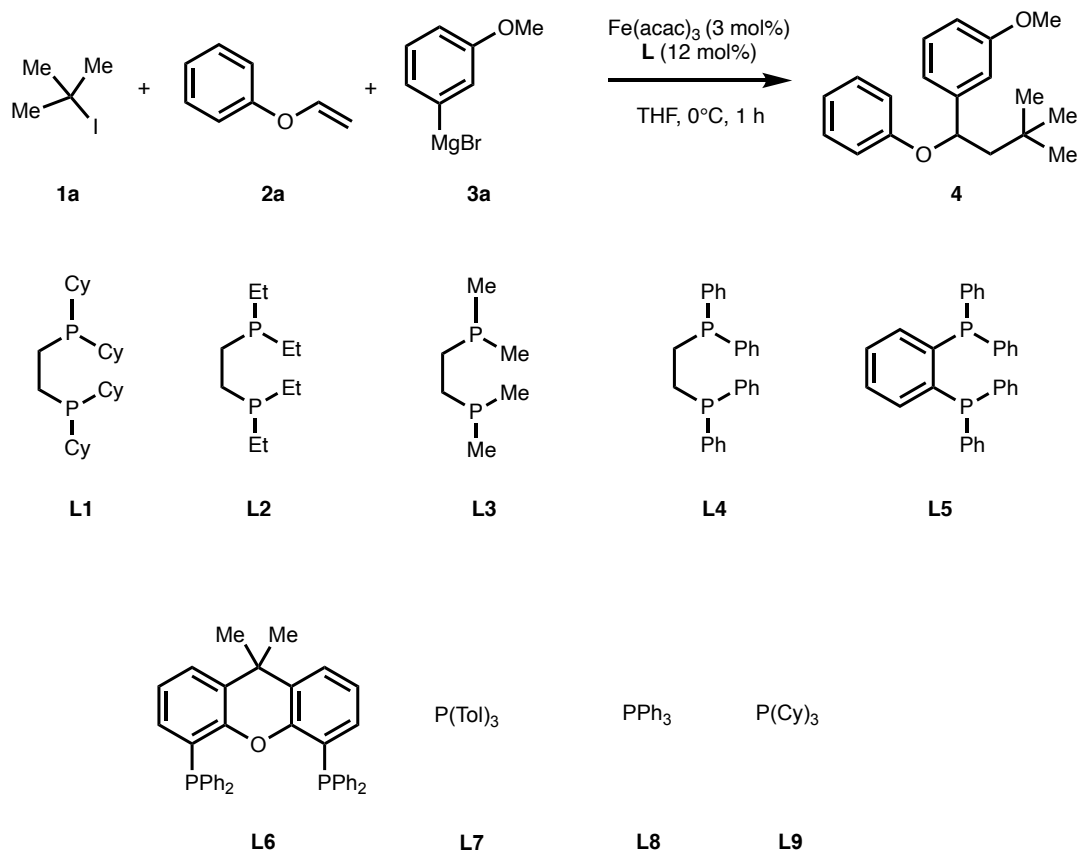

| Entry | Ligand (L) | Yield (%) | Recovered <b>2a</b> (equiv.) |
|-------|------------|-----------|------------------------------|
| 1     | <b>L1</b>  | 75        | 2.4                          |
| 2     | <b>L2</b>  | 0         | --                           |
| 3     | <b>L3</b>  | 0         | --                           |
| 4     | <b>L4</b>  | 45        | 3.1                          |
| 5     | <b>L5</b>  | 0         | --                           |
| 6     | <b>L6</b>  | 0         | --                           |
| 7     | <b>L7</b>  | 0         | --                           |
| 8     | <b>L8</b>  | 0         | --                           |
| 9     | <b>L9</b>  | 0         | --                           |



|    |                    |    |     |
|----|--------------------|----|-----|
| 10 | No <b>L</b>        | 0  | --  |
| 11 | No Fe, No <b>L</b> | 0  | --  |
| 12 | neat               | 67 | 2.7 |

Reactions were performed with a 0.10 mmol scale of *tert*-butyl iodide, 4 equiv. of alkene, 1.5 equiv. of Grignard reagent, THF (0.1 mL) and Grignard addition for 1 h at 0 °C. Reactions were then stirred additional 10 min after Grignard addition. Yield and recovered **2a** were determined by crude <sup>1</sup>H NMR with CH<sub>2</sub>Br<sub>2</sub> as internal standard.

**Table S4.** Screening of chiral ligands

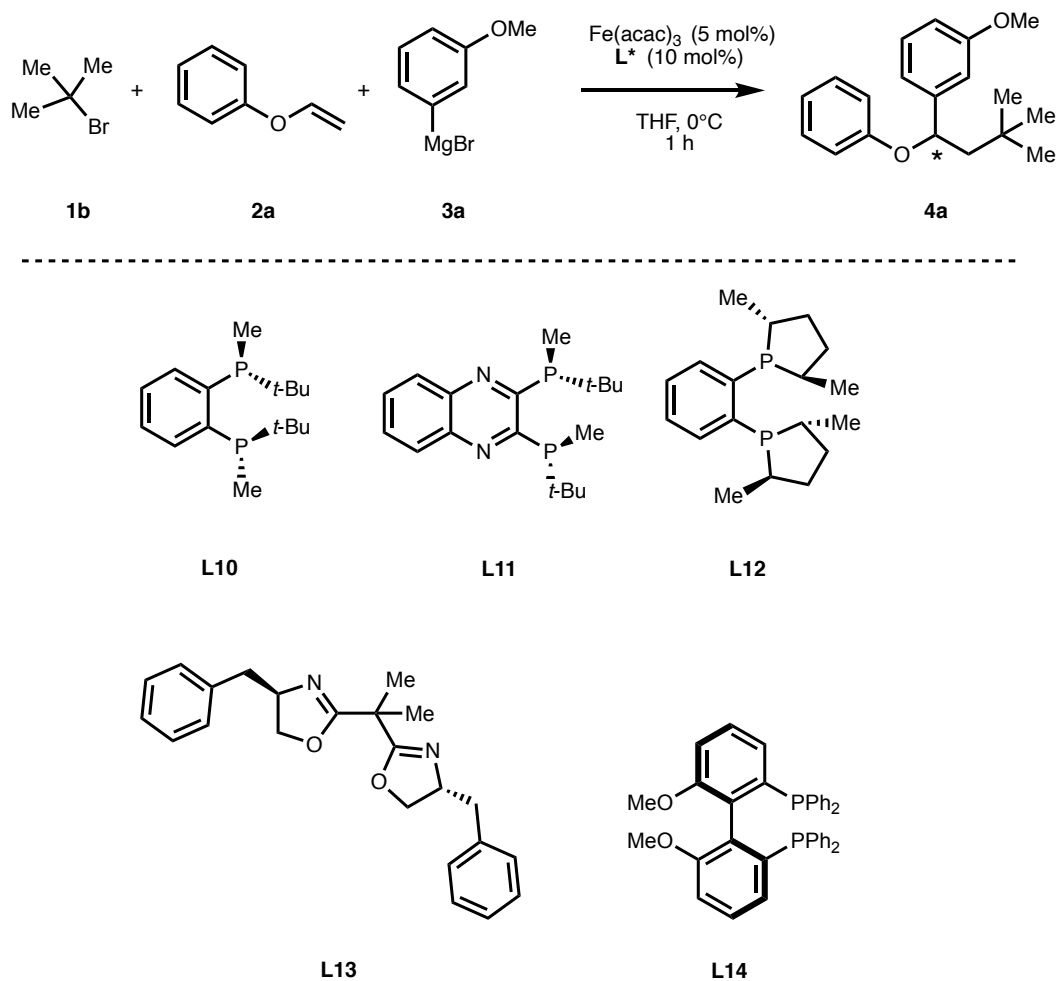

| Entry | Ligand (L) | Yield (%) | Enantiomeric Ratio (er) |
|-------|------------|-----------|-------------------------|
| 1     | <b>L10</b> | 58        | 75:25                   |
| 2     | <b>L11</b> | 22        | 28:72                   |
| 3     | <b>L12</b> | 18        | 73:27                   |
| 4     | <b>L13</b> | 0         | --                      |
| 5     | <b>L14</b> | 0         | --                      |

Reactions were performed with a 0.20 mmol scale of *tert*-butyl bromide, 4 equiv. of alkene, 1.5 equiv. of Grignard reagent, THF (0.2 mL) and Grignard addition for 1 h at 0 °C. Reactions were then stirred additional 10 min after Grignard addition. Yield determined by crude <sup>1</sup>H NMR with CH<sub>2</sub>Br<sub>2</sub> as internal standard for all entries except entry 1 (isolated yield as an average of 4 trials). Enantiomeric ratio determined by chiral HPLC. Enantiomeric ratio of entry 2 determined as an average of 4 trials. Enantiomeric ratio of entries 3 and 4 determined as an average of 2 trials. Enantiomeric ratio (er) values were determined by HPLC with the Daicel Chiralcel OJ-H column (Hexane/*i*-PrOH 99.5:0.5, 0.7 mL/min, 214 nm).

#### HPLC Trace 1 (racemic)

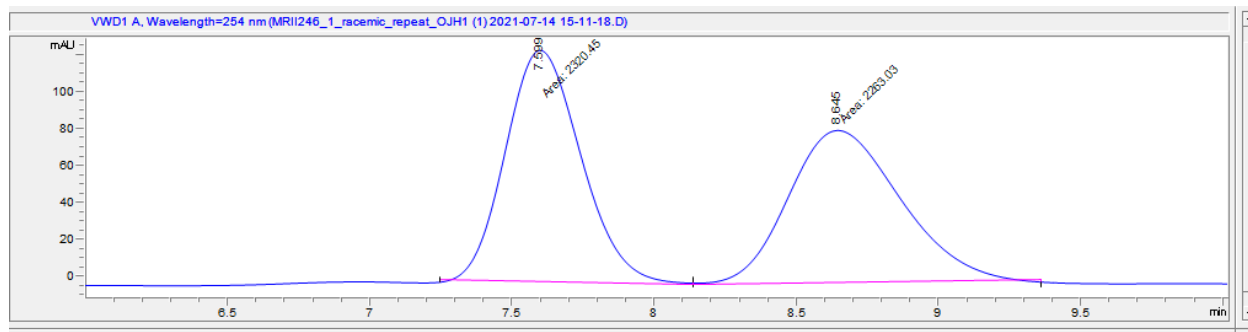

| # | Time  | Type | Area   | Height | Width  | Area%  | Symmetry |
|---|-------|------|--------|--------|--------|--------|----------|
| 1 | 7.599 | MM   | 2320.4 | 125.5  | 0.3083 | 50.626 | 0.825    |
| 2 | 8.645 | MM   | 2263   | 82.6   | 0.4567 | 49.374 | 0.781    |

### HPLC Trace 2 (entry 1, L10, run 1)

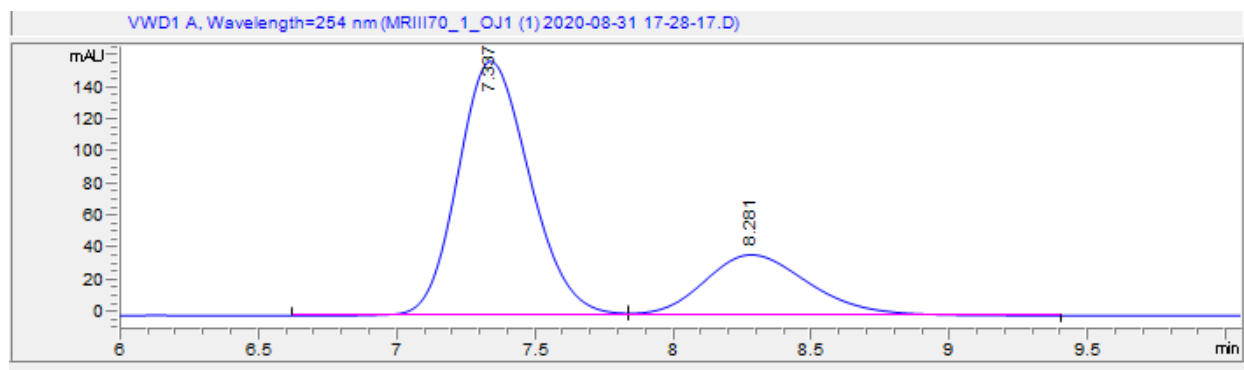

| # | Time  | Type | Area   | Height | Width  | Area%  | Symmetry |
|---|-------|------|--------|--------|--------|--------|----------|
| 1 | 7.337 | MM   | 2875.6 | 159.3  | 0.3008 | 74.118 | 0.821    |
| 2 | 8.281 | MM   | 1004.2 | 38     | 0.4409 | 25.882 | 0.803    |

### HPLC Trace 3 (entry 1, L10, run 2)

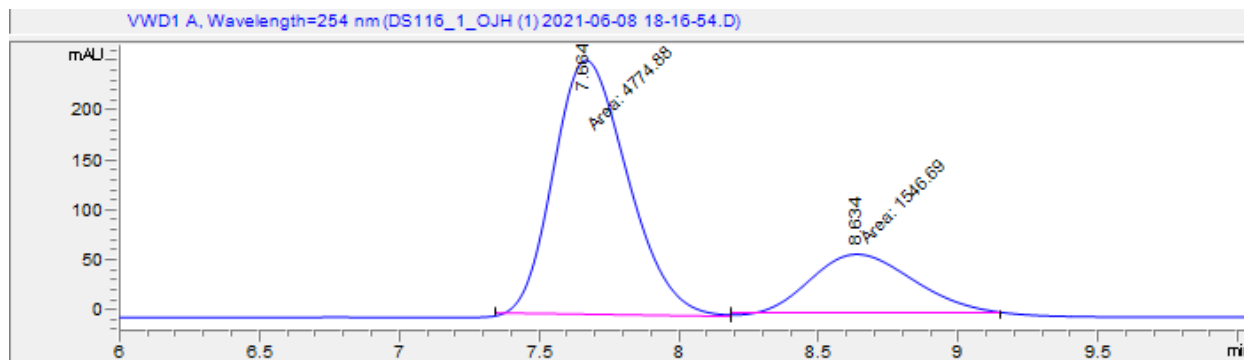

| # | Time  | Type | Area   | Height | Width  | Area%  | Symmetry |
|---|-------|------|--------|--------|--------|--------|----------|
| 1 | 7.664 | MM   | 4774.9 | 257.6  | 0.3089 | 75.533 | 0.757    |
| 2 | 8.634 | MM   | 1546.7 | 60.2   | 0.4284 | 24.467 | 0.801    |

### HPLC Trace 4 (entry 1, L10, run 3)

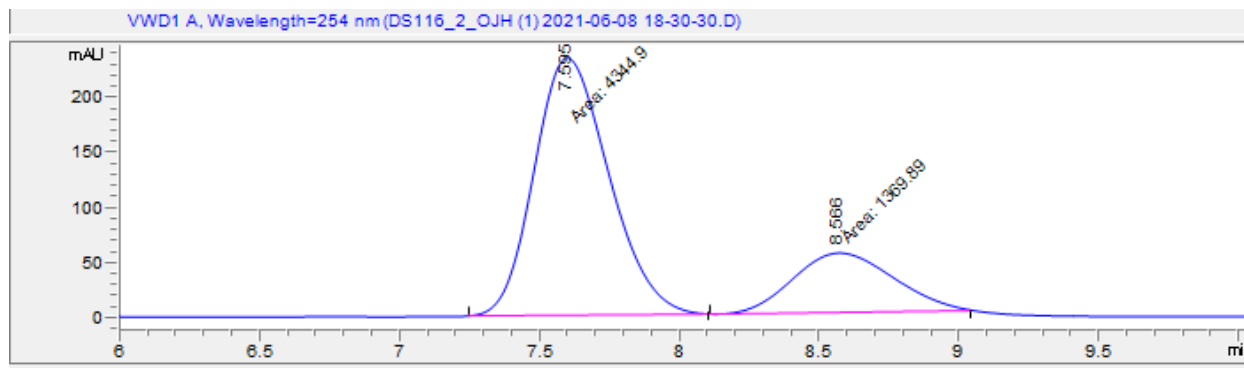

| # | Time  | Type | Area   | Height | Width  | Area%  | Symmetry |
|---|-------|------|--------|--------|--------|--------|----------|
| 1 | 7.595 | MM   | 4344.9 | 233.9  | 0.3097 | 76.029 | 0.777    |
| 2 | 8.566 | MM   | 1369.9 | 54.3   | 0.4201 | 23.971 | 0.859    |

HPLC Trace 5 (entry 1, L10, run 4)

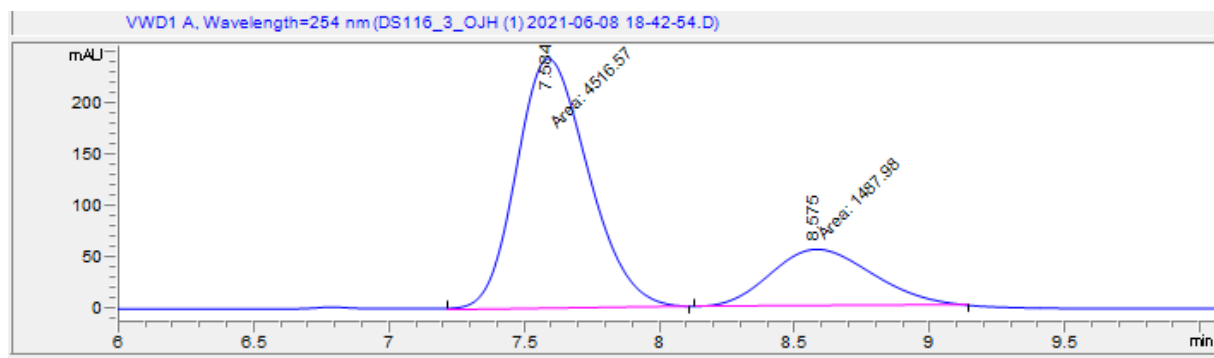

| # | Time  | Type | Area   | Height | Width  | Area%  | Symmetry |
|---|-------|------|--------|--------|--------|--------|----------|
| 1 | 7.584 | MM   | 4516.6 | 243.9  | 0.3087 | 75.219 | 0.778    |
| 2 | 8.575 | MM   | 1488   | 55.9   | 0.4439 | 24.781 | 0.808    |

HPLC Trace 6 (entry 2, L11, run 1)

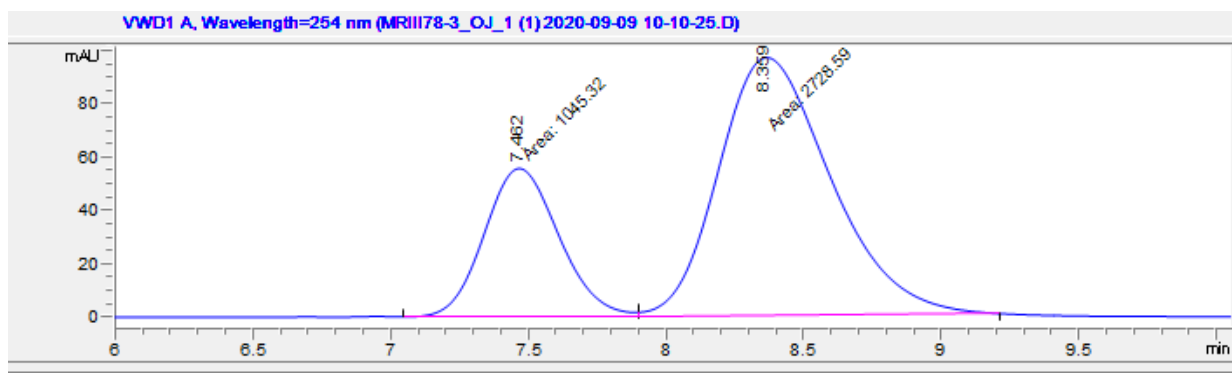

| # | Time  | Type | Area   | Height | Width  | Area%  | Symmetry |
|---|-------|------|--------|--------|--------|--------|----------|
| 1 | 7.462 | MM   | 1045.3 | 55.3   | 0.3152 | 27.699 | 0.86     |
| 2 | 8.359 | MM   | 2728.6 | 96.2   | 0.4727 | 72.301 | 0.735    |

HPLC Trace 7 (entry 2, L11, run 2)

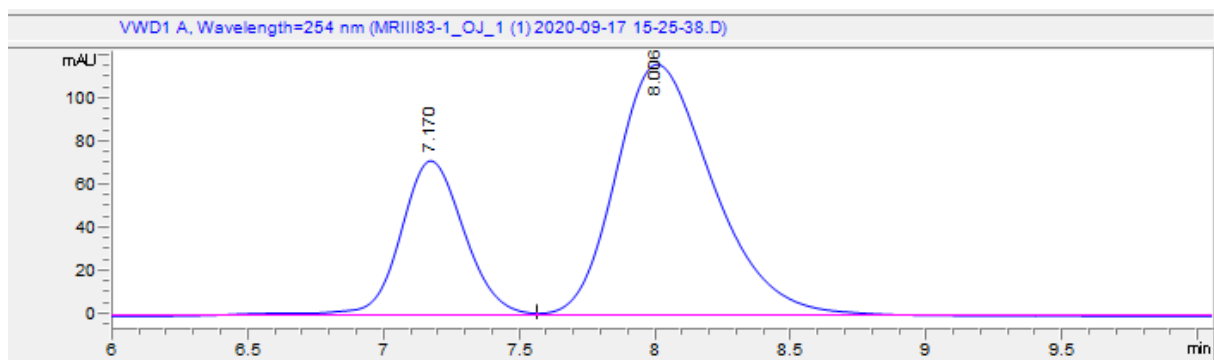

| # | Time  | Type | Area   | Height | Width  | Area%  | Symmetry |
|---|-------|------|--------|--------|--------|--------|----------|
| 1 | 7.17  | BV   | 1217.7 | 72.2   | 0.2606 | 29.202 | 0.943    |
| 2 | 8.006 | VB   | 2952.3 | 117.1  | 0.3882 | 70.798 | 0.697    |

### HPLC Trace 8 (entry 3, L12, run 1)

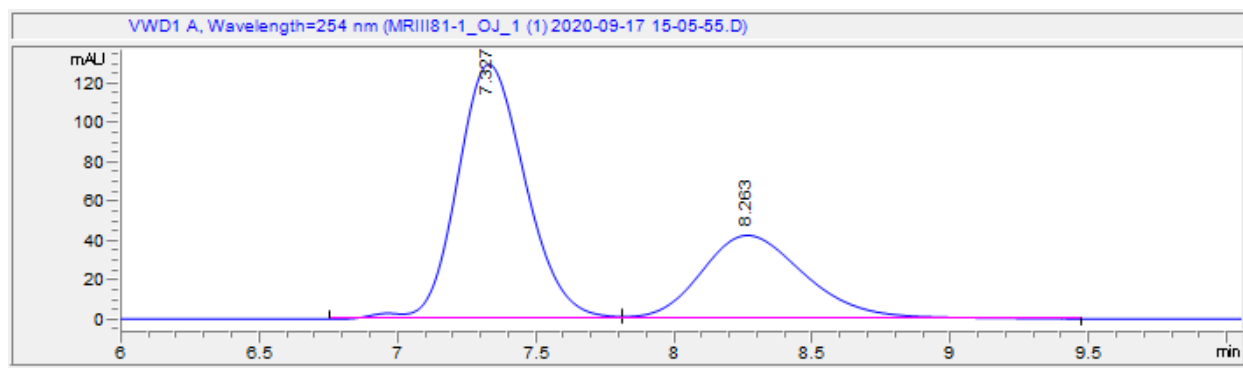

| # | Time  | Type | Area   | Height | Width  | Area%  | Symmetry |
|---|-------|------|--------|--------|--------|--------|----------|
| 1 | 7.327 | VV R | 2231.2 | 130    | 0.2644 | 66.425 | 0.851    |
| 2 | 8.263 | VB   | 1127.8 | 42.6   | 0.4085 | 33.575 | 0.759    |

### HPLC Trace 9 (entry 3, L12, run 2)

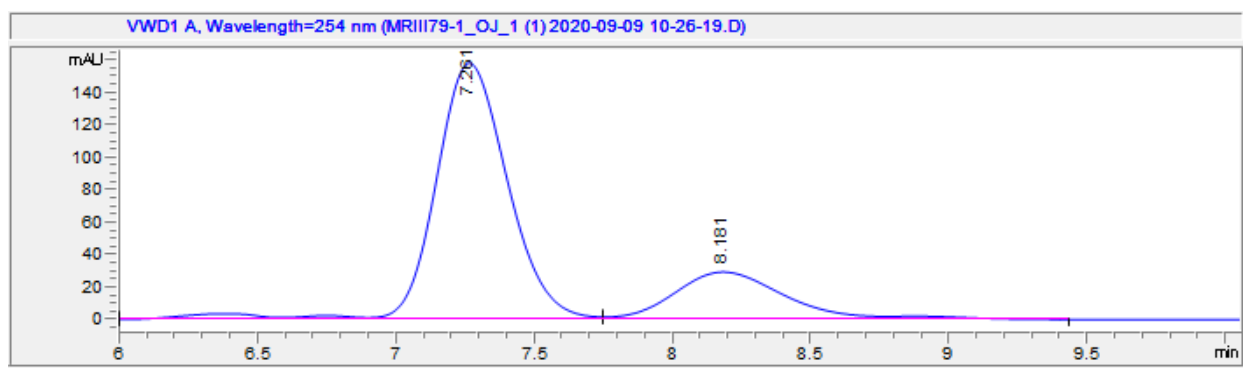

| # | Time  | Type | Area   | Height | Width  | Area%  | Symmetry |
|---|-------|------|--------|--------|--------|--------|----------|
| 1 | 7.261 | MM   | 2699.1 | 155.8  | 0.2887 | 78.868 | 0.825    |
| 2 | 8.181 | MM   | 723.2  | 28     | 0.4303 | 21.132 | 0.789    |

## 5. Substrate Limitations

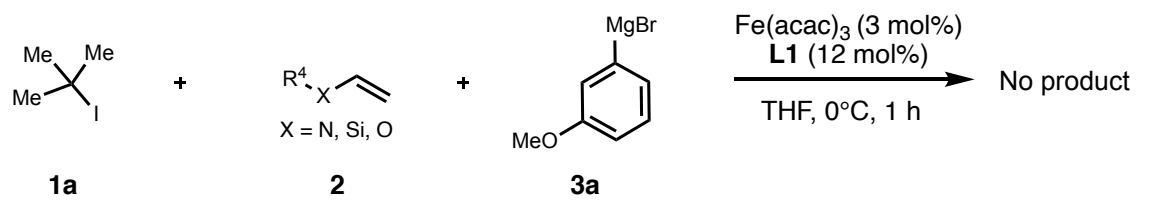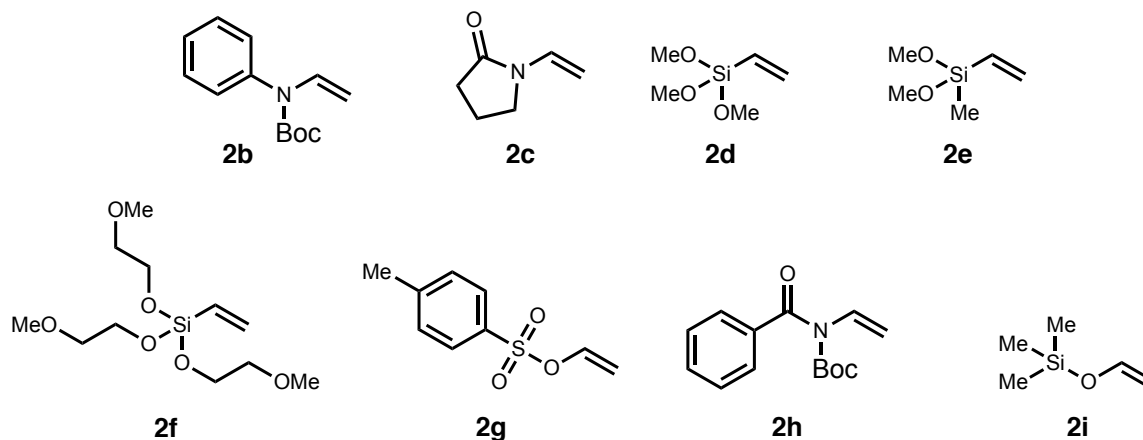

**Figure S1.** Unsuccessful electron-rich alkenes. All reactions were performed under the optimized conditions (Table 1, entry 1) using 0.2 mmol of alkyl halide and yielded none of the desired product.

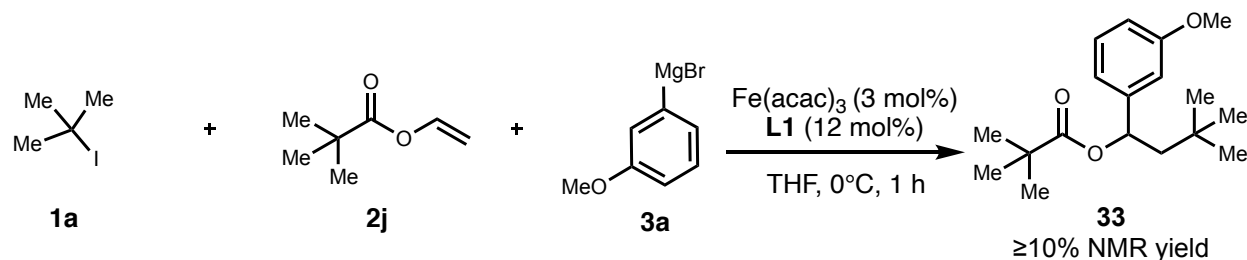

**Figure S2.** Dicarbofunctionalization of vinyl acetate **2j** (4.0 equiv., 0.4 mmol) with *tert*-butyl iodide **1a** (1.0 equiv., 0.1 mmol) and 3-methoxyphenyl magnesium bromide **3a** (1.5 equiv., 0.15 mmol) to give product **33** ( $\geq 10\%$  NMR yield.) The reaction was performed under the optimized conditions (Table 1, entry 1) using 0.1 mmol of alkyl halide.

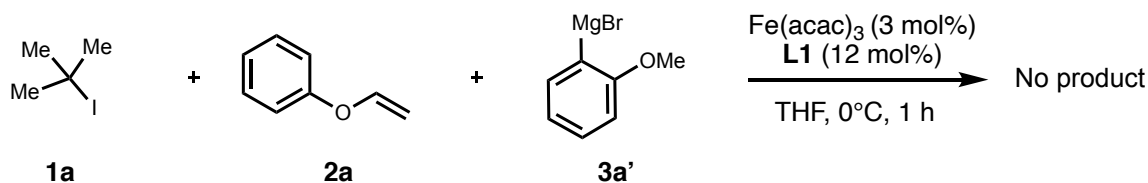

**Figure S3.** Unsuccessful reaction of phenyl vinyl ether **2a** (14.0 equiv., 1.4 mmol) with *tert*-butyl iodide **1a** (1.0 equiv., 0.1 mmol) and *ortho*-methoxyphenyl magnesium bromide **3a'** (1.5 equiv., 0.15 mmol).

## 6. Product Characterization Data

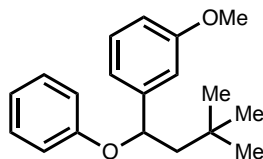

**1-(3,3-Dimethyl-1-phenoxybutyl)-3-methoxybenzene (4):** Compound **4** was synthesized following the general procedure 1 (standard-scale), using *tert*-butyl iodide (36.8 mg, 0.2 mmol), phenyl vinyl ether (96.1 mg, 0.8 mmol) and 3-methoxyphenylmagnesium bromide (0.3 mL, 1.0 M solution in THF, 0.3 mmol). The product **4** was obtained as a colorless liquid (40 mg, 71% yield) after purification by column chromatography on silica gel with hexane/CH<sub>2</sub>Cl<sub>2</sub> (9:1) to hexane/CH<sub>2</sub>Cl<sub>2</sub> (22:3)

**<sup>1</sup>H NMR (400 MHz, CDCl<sub>3</sub>)**  $\delta$  = 7.28-7.18 (m, 3H), 6.95-6.84 (m, 5H), 6.78 (dd,  $J$  = 8.0, 2.4 Hz, 1H), 5.19 (dd,  $J$  = 9.6, 2.0 Hz, 1H), 3.80 (s, 3H), 2.06 (dd,  $J$  = 14.8, 9.6 Hz, 1H), 1.61 (dd,  $J$  = 14.8, 2.0 Hz, 1H), 1.05 (s, 9H);

**<sup>13</sup>C NMR (100 MHz, CDCl<sub>3</sub>)**  $\delta$  = 160.0, 158.2, 145.7, 129.8, 129.4 (2C), 120.6, 118.1, 115.9 (2C), 112.5, 111.4, 78.0, 53.3, 52.9, 30.9, 30.3 (3C);

**IR (film)** 2953, 2835, 1598, 1585, 1491, 1364, 1234, 1064, 750, 690 cm<sup>-1</sup>;

**HRMS (DART)** calcd for C<sub>19</sub>H<sub>24</sub>O<sub>2</sub> [M+NH<sub>4</sub>]<sup>+</sup>  $m/z$  = 302.2120; found: 302.2125.

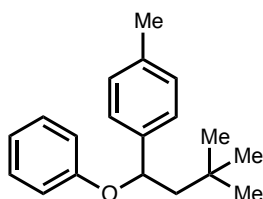

**1-(3,3-Dimethyl-1-phenoxybutyl)-4-methylbenzene (5):** Compound **5** was synthesized following the general procedure 1 (standard-scale), using *tert*-butyl iodide (36.8 mg, 0.2 mmol), phenyl vinyl ether (96.1 mg, 0.8 mmol) and *p*-tolylmagnesium bromide (0.3 mL, 1.0 M solution in THF, 0.3 mmol). The product **5** was obtained as a white solid (37 mg, 70% yield) after purification by column chromatography on silica gel with hexane to hexane/CH<sub>2</sub>Cl<sub>2</sub> (99:1).

**mp:** 55-56 °C;

**<sup>1</sup>H NMR (400 MHz, CDCl<sub>3</sub>)**  $\delta$  = 7.23-7.11 (m, 6H), 6.86-6.81 (m, 3H), 5.18 (dd,  $J$  = 9.6, 2.0 Hz, 1H), 2.31 (s, 3H), 2.03 (dd,  $J$  = 14.8, 9.6 Hz, 1H), 1.57 (dd,  $J$  = 14.8, 2.4 Hz, 1H), 1.02 (s, 9H);

**<sup>13</sup>C NMR (100 MHz, CDCl<sub>3</sub>)**  $\delta$  = 158.2, 140.9, 136.9, 129.4, 129.4 (2C), 125.7 (2C), 120.5, 115.9 (2C), 77.9, 53.0, 30.9 (2C), 30.3 (3C), 21.3;

**IR (film)** 2954, 2866, 1598, 1494, 1237, 1052, 815, 751, 690 cm<sup>-1</sup>;

**HRMS (DART)** calcd for C<sub>19</sub>H<sub>24</sub>O [M+NH<sub>4</sub>]<sup>+</sup>  $m/z$  = 286.2171; found: 286.2175.

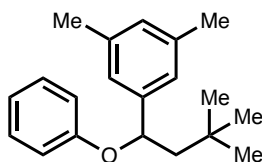

**1-(3,3-Dimethyl-1-phenoxybutyl)-3,5-dimethylbenzene (6):** Compound **6** was synthesized following the general procedure 1 (standard-scale), using *tert*-butyl iodide (36.8 mg, 0.2 mmol), phenyl vinyl ether (96.1 mg, 0.8 mmol) and (3,5-dimethylphenyl) magnesium bromide (0.6 mL, 0.5 M solution in THF, 0.3 mmol). The product **6** was obtained as a colorless liquid (32 mg, 57% yield) after purification by column chromatography on silica gel with hexane to hexane/CH<sub>2</sub>Cl<sub>2</sub> (99:1).

**<sup>1</sup>H NMR (400 MHz, CDCl<sub>3</sub>)**  $\delta$  = 7.21-7.17 (m, 2H), 6.95 (s, 2H), 6.88-6.83 (m, 4H), 5.13 (dd,  $J$  = 9.6, 1.6 Hz, 1H), 2.30 (s, 6H), 2.03 (dd,  $J$  = 14.8, 10 Hz, 1H), 1.56 (dd,  $J$  = 14.8, 2.0 Hz, 1H), 1.03 (s, 9H);

**<sup>13</sup>C NMR (100 MHz, CDCl<sub>3</sub>)**  $\delta$  = 158.4, 143.9, 138.2 (2C), 129.4 (2C), 129.0, 123.4 (2C), 120.5, 115.9 (2C), 78.3, 53.1, 31.0, 30.3 (3C), 21.5 (2C);

**IR (film)** 2952, 2866, 1597, 1586, 1493, 1237, 1057, 847, 751, 689 cm<sup>-1</sup>;

**HRMS (DART)** calcd for C<sub>20</sub>H<sub>26</sub>O [M+NH<sub>4</sub>]<sup>+</sup>  $m/z$  = 300.2327; found: 300.2319.



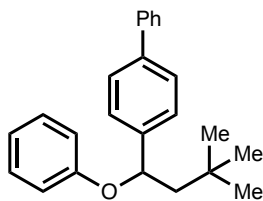

**4-(3,3-Dimethyl-1-phenoxybutyl)-1,1'-biphenyl (7):** Compound **7** was synthesized following the general procedure 1 (standard-scale), using *tert*-butyl iodide (36.8 mg, 0.2 mmol), phenyl vinyl ether (96.1 mg, 0.8 mmol) and 4-biphenylmagnesium bromide (0.6 mL, 0.5 M solution in THF, 0.3 mmol). The product **7** was obtained as a white solid (37 mg, 56% yield) after purification by column chromatography on silica gel with hexane/CH<sub>2</sub>Cl<sub>2</sub> (49:1) to hexane/CH<sub>2</sub>Cl<sub>2</sub>(24:1).

**mp:** 140-141 °C;

**<sup>1</sup>H NMR (400 MHz, CDCl<sub>3</sub>)**  $\delta$  = 7.58-7.54 (m, 4H), 7.45-7.40 (m, 4H), 7.35-7.32 (m, 1H), 7.22-7.18 (m, 2H), 6.90-6.86 (m, 3H), 5.27 (dd,  $J$  = 9.6, 2.0 Hz, 1H), 2.10 (dd,  $J$  = 14.8, 9.6 Hz, 1H), 1.64 (dd,  $J$  = 14.8, 2.0 Hz, 1H), 1.06 (s, 9H);

**<sup>13</sup>C NMR (100 MHz, CDCl<sub>3</sub>)**  $\delta$  = 158.2, 142.9, 141.0, 140.2, 129.5 (2C), 128.9 (2C), 127.5 (2C), 127.3, 127.2 (2C), 126.2 (2C), 120.6, 115.9 (2C), 77.9, 53.0, 31.0, 30.3 (3C);

**IR (film)** 3028, 2953, 1597, 1492, 1364, 1236, 1172, 1053, 751, 691 cm<sup>-1</sup>;

**HRMS (DART)** calcd for C<sub>24</sub>H<sub>26</sub>O [M+NH<sub>4</sub>]<sup>+</sup>  $m/z$  = 348.2327; found: 348.2330.

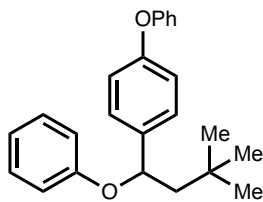

**1-(3,3-Dimethyl-1-phenoxybutyl)-4-phenoxybenzene (8):** Compound **8** was synthesized following the general procedure 1 (standard-scale), using *tert*-butyl iodide (36.8 mg, 0.2 mmol), phenyl vinyl ether (96.1 mg, 0.8 mmol) and (4-phenoxyphenyl) magnesium bromide (0.6 mL, 0.5 M solution in THF, 0.3 mmol). The product **8** was obtained as a colorless liquid (42 mg, 61% yield) after purification by column chromatography on silica gel with hexane/CH<sub>2</sub>Cl<sub>2</sub> (43:7) to hexane/CH<sub>2</sub>Cl<sub>2</sub> (21:4).

**<sup>1</sup>H NMR (400 MHz, CDCl<sub>3</sub>)**  $\delta$  = 7.34-7.28 (m, 4H), 7.21-7.17 (m, 2H), 7.11-7.07 (m, 1H), 7.00-6.94 (m, 4H), 6.89-6.82 (m, 3H), 5.20 (dd,  $J$  = 9.6, 2.4 Hz, 1H), 2.05 (dd,  $J$  = 14.8, 9.6 Hz, 1H), 1.59 (dd,  $J$  = 14.4, 2.4 Hz, 1H), 1.03 (s, 9H);

**<sup>13</sup>C NMR (100 MHz, CDCl<sub>3</sub>)**  $\delta$  = 158.1, 157.3, 156.5, 138.6, 129.9 (2C), 129.4 (2C), 127.2 (2C), 123.4, 120.6, 119.1 (2C), 119.0 (2C), 116.0 (2C), 77.6, 52.9, 30.9, 30.3 (3C);

**IR (film)** 2953, 2866, 1587, 1504, 1487, 1230, 1165, 1052, 871, 750, 689 cm<sup>-1</sup>;

**HRMS (DART)** calcd for C<sub>24</sub>H<sub>26</sub>O<sub>2</sub> [M-H]<sup>-</sup>  $m/z$  = 345.1845; found: 345.1858.

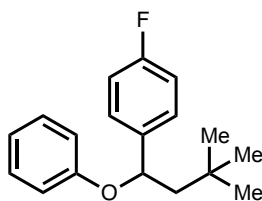

**1-(3,3-Dimethyl-1-phenoxybutyl)-4-fluorobenzene (9):** Compound **9** was synthesized following the general procedure 1 (standard-scale), using *tert*-butyl iodide (36.8 mg, 0.2 mmol), phenyl vinyl ether (96.1 mg, 0.8 mmol) and 4-fluorophenylmagnesium bromide (0.3 mL, 1.0 M solution in THF, 0.3 mmol). The product **9** was obtained as a colorless liquid (25 mg, 46% yield) after purification by column chromatography on silica gel with hexane to hexane/CH<sub>2</sub>Cl<sub>2</sub> (99:1).

**<sup>1</sup>H NMR (400 MHz, CDCl<sub>3</sub>)**  $\delta$  = 7.31-7.27 (m, 2H), 7.19-7.15 (m, 2H), 7.01-6.97 (m, 2H), 6.88-6.84 (m, 1H), 6.79 (dd,  $J$  = 8.8, 1.2 Hz, 2H), 5.19 (dd,  $J$  = 9.6, 2.4 Hz, 1H), 2.02 (dd,  $J$  = 14.8, 9.6 Hz, 1H), 1.55 (dd,  $J$  = 14.8, 2.0 Hz, 1H), 1.02 (s, 9H);.

**<sup>13</sup>C NMR (100 MHz, CDCl<sub>3</sub>)**  $\delta$  = 163.2 ( $J_{C-F}$  = 243.6 Hz), 157.9, 139.55 ( $J_{C-F}$  = 3.2 Hz), 129.5 (2C), 127.4 ( $J_{C-F}$  = 8.0 Hz, 2C), 120.8, 115.9 (2C), 115.7 ( $J_{C-F}$  = 21.3 Hz, 2C), 77.4, 52.9, 30.9, 30.3 (3C);

**<sup>19</sup>F NMR (376 MHz, CDCl<sub>3</sub>)**  $\delta$  = -115.530;

**IR (film)** 2954, 2868, 1598, 1509, 1494, 1365, 1223, 1155, 1053, 834, 752, 690 cm<sup>-1</sup>;

**HRMS (DART)** calcd for C<sub>18</sub>H<sub>21</sub>FO [M+NH<sub>4</sub>]<sup>+</sup>  $m/z$  = 290.1920; found: 290.1919.

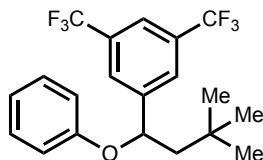

**1-(3,3-Dimethyl-1-phenoxybutyl)-3,5-bis(trifluoromethyl)benzene (10):** Compound **10** was synthesized following the general procedure 1 (standard-scale), using *tert*-butyl iodide (36.8 mg, 0.2 mmol), phenyl vinyl ether (96.1 mg, 0.8 mmol) and 3,5-Bis(trifluoromethyl)phenylmagnesium bromide (0.6 mL, 0.5 M solution in THF, 0.3 mmol). The product **10** was obtained as a white solid (22 mg, 28% yield) after purification by column chromatography on silica gel with hexane to hexane/CH<sub>2</sub>Cl<sub>2</sub> (99:1).

**mp:** 54-55 °C;

**<sup>1</sup>H NMR (400 MHz, CDCl<sub>3</sub>)**  $\delta$  = 7.78 (s, 2H), 7.76 (s, 1H), 7.23-7.19 (m, 2H), 6.94-6.90 (m, 1H), 6.80-6.77 (m, 2H), 5.32 (dd,  $J$  = 10, 2.0 Hz, 1H), 2.05 (dd,  $J$  = 14.8, 10 Hz, 1H), 1.54 (dd,  $J$  = 14.8, 2.0 Hz, 1H), 1.05 (s, 9H);

**<sup>13</sup>C NMR (100 MHz, CDCl<sub>3</sub>)**  $\delta$  = 157.4, 146.7, 132.2 (q,  $J_{C-F}$  = 33.1 Hz, 2C), 129.7 (4C), 126.0 (2C), 121.5 (2C), 115.8 (2C), 77.2, 52.8, 31.1, 30.3 (3C);

**<sup>19</sup>F NMR (376 MHz, CDCl<sub>3</sub>)**  $\delta$  = -105.67, -105.82;

**IR (film)** 2958, 1590, 1494, 1348, 1276, 1234, 1168, 1130, 895, 752, 682 cm<sup>-1</sup>;

**HRMS (DART)** calcd for C<sub>20</sub>H<sub>20</sub>F<sub>6</sub>O [M+NH<sub>4</sub>]<sup>+</sup>  $m/z$  = 408.1762; found: 408.1769.

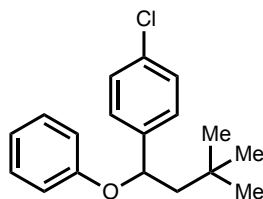

**1-Chloro-4-(3,3-dimethyl-1-phenoxybutyl)benzene (11):** Compound **11** was synthesized following the general procedure 1 (standard-scale), using *tert*-butyl iodide (36.8 mg, 0.2 mmol), phenyl vinyl ether (96.1 mg, 0.8 mmol) and (4-chlorophenyl)magnesium bromide (0.3 mL, 1.0 M solution in diethyl ether, 0.3 mmol). The product **11** was obtained as a colorless liquid (38 mg, 66% yield) after purification by column chromatography on silica gel with hexane to hexane/CH<sub>2</sub>Cl<sub>2</sub> (99:1).

**<sup>1</sup>H NMR (400 MHz, CDCl<sub>3</sub>)**  $\delta$  = 7.30-7.27 (m, 4H), 7.20-7.16 (m, 2H), 6.89-6.85 (m, 1H), 6.80-6.78 (m, 2H), 5.18 (dd,  $J$  = 9.6, 2.4 Hz, 1H), 2.02 (dd,  $J$  = 14.8, 9.6 Hz, 1H), 1.55 (dd,  $J$  = 14.8, 2.4 Hz, 1H), 1.02 (s, 9H);

**<sup>13</sup>C NMR (100 MHz, CDCl<sub>3</sub>)**  $\delta$  = 157.9, 142.4, 133.0, 129.5 (2C), 128.9 (2C), 127.2 (2C), 120.8, 115.9 (2C), 77.4, 52.8, 30.9, 30.3 (3C);

**IR (film)** 2954, 2866, 1598, 1587, 1491, 1235, 1172, 1087, 1053, 883, 822, 751, 690 cm<sup>-1</sup>;

**HRMS (DART)** calcd for C<sub>18</sub>H<sub>21</sub>ClO [M+NH<sub>4</sub>]<sup>+</sup>  $m/z$  = 306.1624; found: 306.1613.

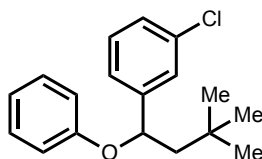

**1-Chloro-3-(3,3-dimethyl-1-phenoxybutyl)benzene (12):** Compound **12** was synthesized following the general procedure 1 (standard-scale), using *tert*-butyl iodide (36.8 mg, 0.2 mmol), phenyl vinyl ether (96.1 mg, 0.8 mmol) and (3-chlorophenyl)magnesium bromide (0.6 mL, 0.5 M solution in THF, 0.3 mmol). The product **12** was obtained as a colorless liquid (36 mg, 62% yield) after purification by column chromatography on silica gel with hexane to hexane/CH<sub>2</sub>Cl<sub>2</sub> (99:1).

**<sup>1</sup>H NMR (400 MHz, CDCl<sub>3</sub>)**  $\delta$  = 7.34 (s, 1H), 7.24-7.18 (m, 5H), 6.89 (t,  $J$  = 7.2 Hz, 1H), 6.82 (d,  $J$  = 8.4 Hz, 2H), 5.18 (dd,  $J$  = 9.6, 2.0 Hz, 1H), 2.03 (dd,  $J$  = 14.8, 10.0 Hz, 1H), 1.57 (dd,  $J$  = 14.4, 2.4 Hz, 1H), 1.04 (s, 9H);

**<sup>13</sup>C NMR (100 MHz, CDCl<sub>3</sub>)**  $\delta$  = 157.8, 146.1, 134.7, 130.1, 129.5 (2C), 127.5, 125.9, 123.9, 120.9, 115.8 (2C), 77.5, 52.8, 31.0, 30.3 (3C);

**IR (film)** 2954, 2867, 1596, 1586, 1492, 1475, 1234, 1077, 1053, 885, 785, 751, 689 cm<sup>-1</sup>;

**HRMS (DART)** calcd for C<sub>18</sub>H<sub>21</sub>ClO [M+NH<sub>4</sub>]<sup>+</sup>  $m/z$  = 306.1624; found: 306.1627.

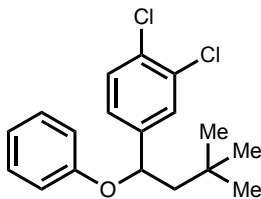

**1,2-Dichloro-4-(3,3-dimethyl-1-phenoxybutyl)benzene (13):** Compound **13** was synthesized following the general procedure 1 (standard-scale), using *tert*-butyl iodide (36.8 mg, 0.2 mmol), phenyl vinyl ether (96.1 mg, 0.8 mmol) and (3,4-dichlorophenyl)magnesium bromide (0.6 mL, 0.5 M solution in THF, 0.3 mmol). The product **13** was obtained as a colorless liquid (22 mg, 34% yield) after purification by column chromatography on silica gel with hexane to hexane/CH<sub>2</sub>Cl<sub>2</sub> (99:1).

**<sup>1</sup>H NMR (400 MHz, CDCl<sub>3</sub>)**  $\delta$  = 7.42 (d, *J* = 2.0 Hz, 1H), 7.39 (d, *J* = 8.4 Hz, 1H), 7.22-7.16 (m, 3H), 6.91-6.87 (m, 1H), 6.79-6.77 (m, 2H), 5.14 (dd, *J* = 10.0, 2.0 Hz, 1H), 2.00 (dd, *J* = 14.8, 9.6 Hz, 1H), 1.52 (dd, *J* = 14.8, 2.4 Hz, 1H), 1.02 (s, 9H);

**<sup>13</sup>C NMR (100 MHz, CDCl<sub>3</sub>)**  $\delta$  = 157.6, 144.3, 132.9, 131.3, 130.8, 129.6 (2C), 127.8, 125.2, 121.1, 115.8 (2C), 77.0, 52.7, 31.0, 30.2 (3C);

**IR (film)** 2954, 2868, 1598, 1587, 1493, 1472, 1234, 1152, 1055, 1029, 887, 751, 689;

**HRMS (DART)** calcd for C<sub>18</sub>H<sub>20</sub>Cl<sub>2</sub>O [M+NH<sub>4</sub>]<sup>+</sup> *m/z* = 340.1234; found: 340.1232.

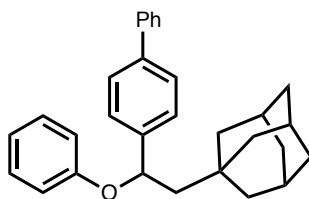

**1-(2-([1,1'-Biphenyl]-4-yl)-2-phenoxyethyl)adamantane (14):** Compound **14** was synthesized following the general procedure 1 (standard-scale), using iodoadamantane (52.4 mg, 0.2 mmol), phenyl vinyl ether (96.1 mg, 0.8 mmol) and 4-biphenylmagnesium bromide (0.6 mL, 0.5 M solution in THF, 0.3 mmol). The product **14** was obtained as a white solid (40 mg, 49% yield) after purification by column chromatography on silica gel with hexane/CH<sub>2</sub>Cl<sub>2</sub> (23:2) to hexane/CH<sub>2</sub>Cl<sub>2</sub> (9:1).

**mp:** 143-144 °C;

**<sup>1</sup>H NMR (400 MHz, CDCl<sub>3</sub>)**  $\delta$  = 7.58-7.54 (m, 4H), 7.44-7.38 (m, 4H), 7.35-7.31 (m, 1H), 7.23-7.19 (m, 2H), 6.90-6.86 (m, 3H), 5.32 (dd,  $J$  = 9.6, 1.6 Hz, 1H), 2.02-1.96 (m, 4H), 1.74-1.64 (m, 12H), 1.49 (dd,  $J$  = 15.2, 2.0 Hz, 1H);

**<sup>13</sup>C NMR (100 MHz, CDCl<sub>3</sub>)**  $\delta$  = 158.1, 143.1, 141.0, 140.1, 129.4 (2C), 128.6 (2C), 127.5 (2C), 127.3, 127.2 (2C), 126.2 (2C), 120.6, 116.0 (2C), 76.3, 54.0, 43.1 (3C), 37.2 (3C), 33.0, 28.9 (3C);

**IR (film)** 3027, 2898, 2845, 1598, 1586, 1492, 1448, 1234, 1171, 1007, 751, 691 cm<sup>-1</sup>;

**HRMS (DART)** calcd for C<sub>30</sub>H<sub>32</sub>O [M-H]<sup>-</sup>  $m/z$  = 407.2374; found: 407.2382.

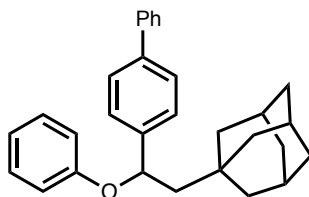

**1-(2-([1,1'-Biphenyl]-4-yl)-2-phenoxyethyl)adamantane (15):** Compound **15** was synthesized following the general procedure 1 (standard-scale), using bromoadamantane (43 mg, 0.2 mmol), phenyl vinyl ether (96.1 mg, 0.8 mmol) and 4-biphenylmagnesium bromide (0.6 mL, 0.5 M solution in THF, 0.3 mmol). The product **15** was obtained as a white solid (30 mg, 37% yield) after purification by column chromatography on silica gel with hexane/CH<sub>2</sub>Cl<sub>2</sub> (23:2) to hexane/CH<sub>2</sub>Cl<sub>2</sub> (9:1).

**mp:** 143-144 °C;

**<sup>1</sup>H NMR (400 MHz, CDCl<sub>3</sub>)**  $\delta$  = 7.57-7.52 (m, 4H), 7.43-7.37 (m, 4H), 7.34-7.30 (m, 1H), 7.22-7.17 (m, 2H), 6.88-6.84 (m, 3H), 5.30 (dd,  $J$  = 9.6, 2.0 Hz, 1H), 2.00-1.94 (m, 4H), 1.72-1.62 (m, 12H), 1.47 (dd,  $J$  = 14.8, 2.0 Hz, 1H); Spectral data matched compound **14**.

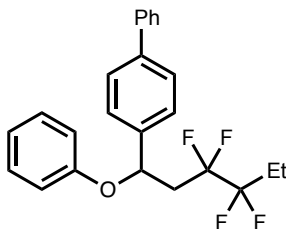

**4-(3,3,4,4-Tetrafluoro-1-phenoxyhexyl)-1,1'-biphenyl (16):** Compound **16** was synthesized following the general procedure 1 (standard-scale), using 1-bromo-1,1,2,2-tetrafluorobutane (41.7 mg, 0.2 mmol), phenyl vinyl ether (96.1 mg, 0.8 mmol) and 4-biphenylmagnesium bromide (0.6 mL, 0.5 M solution in THF, 0.3 mmol). The product **16** was obtained as a white solid (70 mg, 87%

yield) after purification by column chromatography on silica gel with hexane/CH<sub>2</sub>Cl<sub>2</sub> (24:1) to hexane/CH<sub>2</sub>Cl<sub>2</sub> (47:3).

**mp:** 88-89 °C;

**<sup>1</sup>H NMR (400 MHz, CDCl<sub>3</sub>)**  $\delta$  = 7.60-7.56 (m, 4H), 7.49-7.41 (m, 4H), 7.36-7.33 (m, 1H), 7.23-7.20 (m, 2H), 6.93-6.89 (m, 3H), 5.61 (dd,  $J$  = 8.8, 3.6 Hz, 1H), 2.94-2.79 (m, 1H), 2.60-2.46 (m, 1H), 2.14-1.99 (m, 2H), 1.11 (t,  $J$  = 7.6 Hz, 3H);

**<sup>13</sup>C NMR (100 MHz, CDCl<sub>3</sub>)**  $\delta$  = 157.8, 141.2, 140.7, 140.2, 129.5 (2C), 128.9 (2C), 127.7 (2C), 127.6, 127.2 (2C), 126.5 (2C), 122.2-115.3 (2C), 121.4, 116.3 (2C), 74.1, 39.2 (t,  $J$  = 21.5 Hz), 23.4 (t,  $J$  = 23.4 Hz), 5.0 (t,  $J$  = 5.2 Hz);

**<sup>19</sup>F NMR (376 MHz, CDCl<sub>3</sub>)**  $\delta$  = -112.84 to -113.58 (m, 1F), -113.96 to -114.70 (m, 1F), -117.33 to -117.36 (m, 2F);

**IR (film)** 3030, 2991, 2950, 1598, 1492, 1289, 1235, 1172, 1101, 1084, 1003, 851, 752, 689 cm<sup>-1</sup>;

**HRMS (DART)** calcd for C<sub>24</sub>H<sub>22</sub>F<sub>4</sub>O [M+NH<sub>4</sub>]<sup>+</sup>  $m/z$  = 420.1951; found: 420.1954.

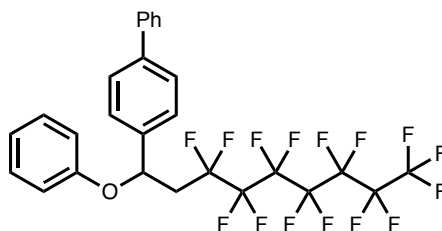

**4-(3,3,4,4,5,5,6,6,7,7,8,8,9,9,9-pentadecafluoro-1-phenoxy-nonyl)-1,1'-biphenyl (17):**

Compound **17** was synthesized following the general procedure 1 (standard-scale), using 1-bromo-1,1,2,2,3,3,4,4,5,5,6,6,7,7,7-pentadecafluoroheptane (89.7 mg, 0.2 mmol), phenyl vinyl ether (96.1 mg, 0.8 mmol) and 4-biphenylmagnesium bromide (0.6 mL, 0.5 M solution in THF, 0.3 mmol). The product **17** was obtained as a white solid (82 mg, 64% yield) after purification by column chromatography on silica gel with hexane/CH<sub>2</sub>Cl<sub>2</sub> (9:1) to hexane/CH<sub>2</sub>Cl<sub>2</sub> (22:3).

**mp:** 95-96 °C;

**<sup>1</sup>H NMR (400 MHz, CDCl<sub>3</sub>)**  $\delta$  = 7.61-7.56 (m, 4H), 7.49-7.42 (m, 4H), 7.37-7.33 (m, 1H), 7.24-7.20 (m, 2H), 6.95-6.88 (m, 3H), 5.61 (dd,  $J$  = 8.8, 3.2 Hz, 1H), 3.02-2.87 (m, 1H), 2.62-2.49 (m, 1H);

**<sup>13</sup>C NMR (100 MHz, CDCl<sub>3</sub>)**  $\delta$  = 157.5, 141.5, 140.6, 139.3, 129.6 (2C), 129.0 (2C), 127.9 (2C), 127.7, 127.2 (2C), 126.4 (2C), 121.7, 120.0-108.4 (7C) 116.3 (2C), 73.6, 40.0 (t,  $J$  = 20.7 Hz);

**<sup>19</sup>F NMR (376 MHz, CDCl<sub>3</sub>)**  $\delta$  = -111.86 to -113.61 (m, 2F), -121.46 to -123.46 (m, 10F), -126.05 to -126.14 (m, 3F);

**IR (film)** 3016, 2926, 2862, 2604, 2359, 2337, 2186, 2032, 1215, 771, 667 cm<sup>-1</sup>;

**HRMS (DART)** calcd for C<sub>27</sub>H<sub>17</sub>F<sub>15</sub>O [M+NH<sub>4</sub>]<sup>+</sup>  $m/z$  = 660.1383; found: 660.1364.

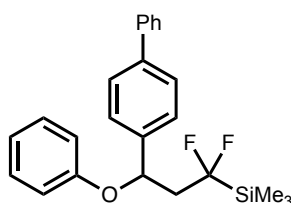

**(3-([1,1'-Biphenyl]-4-yl)-1,1-difluoro-3-phenoxypropyl)trimethylsilane (18):** Compound **18** was synthesized following the general procedure 1 (standard-scale), using (bromodifluoromethyl)trimethylsilane (40.6 mg, 0.2 mmol), phenyl vinyl ether (96.1 mg, 0.8 mmol) and 4-biphenylmagnesium bromide (0.6 mL, 0.5 M solution in THF, 0.3 mmol). The product **18** was obtained as a colorless liquid (52 mg, 65% yield) after purification by column chromatography on silica gel with hexane/CH<sub>2</sub>Cl<sub>2</sub> (23:2) to hexane/CH<sub>2</sub>Cl<sub>2</sub> (9:1).

**<sup>1</sup>H NMR (400 MHz, CDCl<sub>3</sub>)**  $\delta$  = 7.58-7.56 (m, 4H), 7.47-7.41 (m, 4H), 7.36-7.32 (m, 1H), 7.23-7.19 (m, 2H), 6.91-6.88 (m, 3H), 5.59 (dd,  $J$  = 8.8, 2.8 Hz, 1H), 2.78-2.61 (m, 1H), 2.39-2.24 (m, 1H), 0.22 (s, 9H);

**<sup>13</sup>C NMR (100 MHz, CDCl<sub>3</sub>)**  $\delta$  = 157.4, 140.8, 140.8 (2C), 129.5 (2C), 128.9 (2C), 127.6 (2C), 127.5, 127.2 (2C), 126.5 (2C), 121.1 (2C), 116.2 (2C), 74.0 (dd,  $J$  = 10.4, 4.2 Hz), 45.8 (t,  $J$  = 20.4 Hz), -4.2 (3C);

**<sup>19</sup>F NMR (376 MHz, CDCl<sub>3</sub>)**  $\delta$  = -107.82 to -108.69 (m, 1F), -113.16 to -114.02 (m, 1F);

**IR (film)** 3030, 2959, 1598, 1489, 1232, 1172, 1082, 1063, 1007, 956, 844, 752, 690 cm<sup>-1</sup>;

**HRMS (DART)** calcd for C<sub>24</sub>H<sub>26</sub>F<sub>2</sub>OSi [M+NH<sub>4</sub>]<sup>+</sup>  $m/z$  = 414.2064; found: 414.2059.



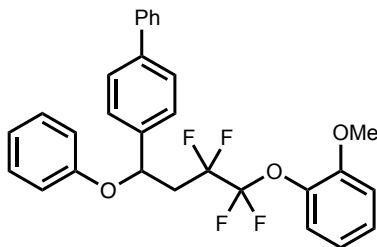

**4-(3,3,4,4-Tetrafluoro-4-(2-methoxyphenoxy)-1-phenoxybutyl)-1,1'-biphenyl (19):**

Compound **19** was synthesized following the general procedure 1 (standard-scale), using 1-(2-bromo-1,1,2,2-tetrafluoroethoxy)-2-methoxybenzene (60.6 mg, 0.2 mmol), phenyl vinyl ether (96.1 mg, 0.8 mmol) and 4-biphenylmagnesium bromide (0.6 mL, 0.5 M solution in THF, 0.3 mmol). The product **19** was obtained as a colorless liquid (91 mg, 92% yield) after purification by column chromatography on silica gel with hexane/CH<sub>2</sub>Cl<sub>2</sub> (43:7) to hexane/CH<sub>2</sub>Cl<sub>2</sub> (21:4).

**<sup>1</sup>H NMR (400 MHz, CDCl<sub>3</sub>)**  $\delta$  = 7.61-7.51 (m, 6H), 7.45-7.41 (m, 2H), 7.36-7.33 (m, 1H), 7.25-7.19 (m, 4H), 6.98-6.89 (m, 5H), 5.73 (dd,  $J$  = 8.8, 3.6 Hz, 1H), 3.81 (s, 3H), 3.12-2.97 (m, 1H), 2.81-2.67 (m, 1H);

**<sup>13</sup>C NMR (100 MHz, CDCl<sub>3</sub>)**  $\delta$  = 157.8, 152.5, 141.2, 140.7, 140.1, 137.9, 129.5 (2C), 128.9 (2C), 127.7 (2C), 127.6, 127.6, 127.2 (2C), 126.6 (2C), 124.0, 121.4, 120.7, 120.2-113.6 (2C), 116.4 (2C), 112.9, 74.1, 56.1, 40.3 (t,  $J$  = 20.9 Hz);

**<sup>19</sup>F NMR (376 MHz, CDCl<sub>3</sub>)**  $\delta$  = -114.29 to -115.01 (m, 2F), -116.04 to -116.74 (m, 2F);

**IR (film)** 3030, 2925, 2841, 1598, 1501, 1493, 1456, 1261, 1237, 1189, 1170, 1105, 1025, 1007, 750, 692 cm<sup>-1</sup>;

**HRMS (DART)** calcd for C<sub>29</sub>H<sub>24</sub>F<sub>4</sub>O<sub>3</sub> [M+NH<sub>4</sub>]<sup>+</sup>  $m/z$  = 514.2005; found: 514.1995.

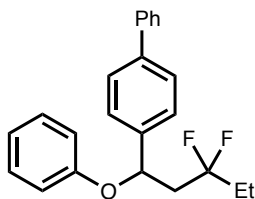

**4-(3,3-Difluoro-1-phenoxypropyl)-1,1'-biphenyl (20):** Compound **20** was synthesized following the general procedure 1 (standard-scale), using 1-bromo-1,1-difluoropropane (31.7 mg, 0.2 mmol), phenyl vinyl ether (96.1 mg, 0.8 mmol) and 4-biphenylmagnesium bromide (0.6 mL, 0.5 M solution in THF, 0.3 mmol). The product **20** was obtained as a colorless liquid (37 mg, 52% yield)

after purification by column chromatography on silica gel with hexane/CH<sub>2</sub>Cl<sub>2</sub> (22:3) to hexane/CH<sub>2</sub>Cl<sub>2</sub> (43:7).

**<sup>1</sup>H NMR (400 MHz, CDCl<sub>3</sub>)**  $\delta$  = 7.58-7.56 (m, 4H), 7.46-7.41 (m, 4H), 7.36-7.32 (m, 1H), 7.23-7.19 (m, 2H), 6.93-6.87 (m, 3H), 5.46 (dd,  $J$  = 9.2, 2.8 Hz, 1H), 2.76-2.61 (m, 1H), 2.39-2.27 (m, 1H), 2.06-1.92 (m, 2H), 1.09 (t,  $J$  = 7.6 Hz, 3H);

**<sup>13</sup>C NMR (100 MHz, CDCl<sub>3</sub>)**  $\delta$  = 157.6, 141.0, 140.7, 140.4, 129.6 (2C), 128.9 (2C), 127.7 (2C), 127.5, 127.2 (2C), 126.4 (2C), 124.5, 121.3, 116.4 (2C), 75.1 (dd,  $J$  = 8.5, 3.3 Hz), 45.0 (t,  $J$  = 26 Hz), 30.2 (t,  $J$  = 25.4 Hz), 6.8 (dd,  $J$  = 6.8, 4.8 Hz);

**<sup>19</sup>F NMR (376 MHz, CDCl<sub>3</sub>)**  $\delta$  = -95.07 (d,  $J$  = 64.8 Hz, 1F), -97.98 (d,  $J$  = 64.8 Hz, 1F);

**IR (film)** 3030, 2941, 2853, 1598, 1492, 1377, 1235, 1007, 965, 887, 754, 691 cm<sup>-1</sup>;

**HRMS (DART)** calcd for C<sub>23</sub>H<sub>22</sub>F<sub>2</sub>O [M+NH<sub>4</sub>]<sup>+</sup>  $m/z$  = 370.1982; found: 370.1996.

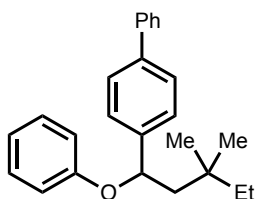

**4-(3,3-Dimethyl-1-phenoxypropyl)-1'-biphenyl (21):** Compound **21** was synthesized following the general procedure 1 (standard-scale), using 2-bromo-2-methylbutane (30.2 mg, 0.2 mmol), phenyl vinyl ether (96.1 mg, 0.8 mmol) and 4-biphenylmagnesium bromide (0.6 mL, 0.5 M solution in THF, 0.3 mmol). The product **21** was obtained as a white solid (35 mg, 51% yield) after purification by column chromatography on silica gel with hexane/CH<sub>2</sub>Cl<sub>2</sub> (24:1) to hexane/CH<sub>2</sub>Cl<sub>2</sub> (47:3).

**mp:** 81-82 °C;

**<sup>1</sup>H NMR (400 MHz, CDCl<sub>3</sub>)**  $\delta$  = 7.58-7.54 (m, 4H), 7.44-7.39 (m, 4H), 7.35-7.31 (m, 1H), 7.22-7.18 (m, 2H), 6.87-6.84 (m, 3H), 5.25 (dd,  $J$  = 9.6, 2.0 Hz, 1H), 2.09 (dd,  $J$  = 15.2, 9.6 Hz, 1H), 1.60 (dd,  $J$  = 15.2, 2.0 Hz, 1H), 1.46-1.31 (m, 2H), 1.01 (d,  $J$  = 3.2 Hz, 6H), 0.90 (t,  $J$  = 7.6 Hz, 3H);

**<sup>13</sup>C NMR (100 MHz, CDCl<sub>3</sub>)**  $\delta$  = 158.2, 143.0, 141.0, 140.2, 129.4 (2C), 128.9 (2C), 127.5 (2C), 127.3, 127.2 (2C), 126.1 (2C), 120.6, 115.9 (2C), 77.6, 50.5, 35.1, 33.5, 27.5, 27.5, 8.7;

**IR (film)** 3028, 2969, 1597, 1492, 1300, 1236, 1171, 1077, 1006, 765, 752, 690 cm<sup>-1</sup>;

**HRMS (DART)** calcd for C<sub>25</sub>H<sub>28</sub>O [M+NH<sub>4</sub>]<sup>+</sup> m/z = 362.2483; found: 362.2484.

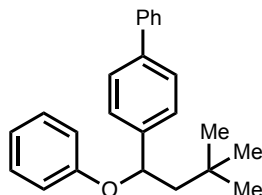

**4-(3,3-Dimethyl-1-phenoxybutyl)-1,1'-biphenyl (22):** Compound **22** was synthesized following the general procedure 1 (standard-scale), using *tert*-butyl chloride (18.5 mg, 0.2 mmol), phenyl vinyl ether (96.1 mg, 0.8 mmol) and 4-biphenylmagnesium bromide (0.6 mL, 0.5 M solution in THF, 0.3 mmol). The product **22** was obtained as a white solid (26 mg, 39% yield) after purification by column chromatography on silica gel with hexane/CH<sub>2</sub>Cl<sub>2</sub> (49:1) to hexane/CH<sub>2</sub>Cl<sub>2</sub> (24:1).

**mp:** 140-141 °C;

**<sup>1</sup>H NMR (400 MHz, CDCl<sub>3</sub>)**  $\delta$  = 7.60-7.56 (m, 4H), 7.46-7.42 (m, 4H), 7.37-7.33 (m, 1H), 7.24-7.20 (m, 2H), 6.91-6.87 (m, 3H), 5.28 (dd,  $J$  = 10.0, 2.0 Hz, 1H), 2.11 (dd,  $J$  = 14.8, 9.6 Hz, 1H), 1.66 (dd,  $J$  = 14.8, 2.4 Hz, 1H), 1.08 (s, 9H); Spectral data matched compound 7.

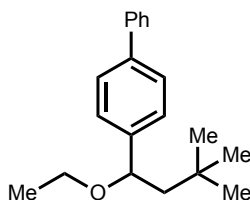

**4-(1-Ethoxy-3,3-dimethylbutyl)-1,1'-biphenyl (23):** Compound **23** was synthesized following the general procedure 1 (standard-scale), using *tert*-butyl iodide (36.8 mg, 0.2 mmol), ethyl vinyl ether (57.6 mg, 0.8 mmol) and 4-biphenylmagnesium bromide (0.6 mL, 0.5 M solution in THF, 0.3 mmol). The product **23** was obtained as a colorless liquid (20 mg, 36% yield) after purification by column chromatography on silica gel with hexane/CH<sub>2</sub>Cl<sub>2</sub> (23:2) to hexane/CH<sub>2</sub>Cl<sub>2</sub> (9:1).

**<sup>1</sup>H NMR (400 MHz, CDCl<sub>3</sub>)**  $\delta$  = 7.60-7.55 (m, 4H), 7.45-7.41 (m, 2H), 7.36-7.31 (m, 3H), 4.36 (dd,  $J$  = 8.8, 2.8 Hz, 1H), 3.40-3.29 (m, 2H), 1.83 (dd,  $J$  = 14.4, 9.2 Hz, 1H), 1.46 (dd,  $J$  = 14.4, 3.2 Hz, 1H), 1.18 (t,  $J$  = 7.2 Hz, 3H), 0.99 (s, 9H);

**<sup>13</sup>C NMR (100 MHz, CDCl<sub>3</sub>)**  $\delta$  = 143.9, 141.2, 140.2, 128.9 (2C), 127.3, 127.2 (2C), 127.2 (2C), 126.9 (2C), 79.9, 64.1, 52.3, 30.8, 30.4 (3C), 15.6;

**IR (film)** 2917, 2849, 1486, 1364, 1215, 1091, 838, 751, 697, 668 cm<sup>-1</sup>;

**HRMS (DART)** calcd for C<sub>20</sub>H<sub>26</sub>O [M+ NH<sub>4</sub>]<sup>+</sup> m/z = 300.2327; found: 300.2331.

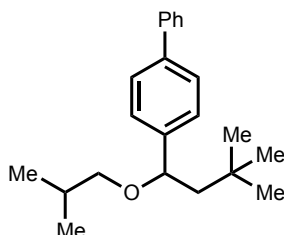

**4-(1-Isobutoxy-3,3-dimethylbutyl)-1,1'-biphenyl (24):** Compound **24** was synthesized following the general procedure 1 (standard-scale), using *tert*-butyl iodide (36.8 mg, 0.2 mmol), isobutyl vinyl ether (80.1 mg, 0.4 mmol) and 4-biphenylmagnesium bromide (0.6 mL, 0.5 M solution in THF, 0.3 mmol). The product **24** was obtained as a colorless liquid (20 mg, 33% yield) after purification by column chromatography on silica gel with hexane/CH<sub>2</sub>Cl<sub>2</sub> (24:1) to hexane/CH<sub>2</sub>Cl<sub>2</sub> (47:3).

**<sup>1</sup>H NMR (400 MHz, CDCl<sub>3</sub>)**  $\delta$  = 7.61-7.54 (m, 4H), 7.45-7.41 (m, 2H), 7.35-7.31 (m, 3H), 4.32 (dd, *J* = 9.2, 2.8 Hz, 1H), 3.09 (dd, *J* = 8.8, 6.0 Hz, 1H), 2.98 (dd, *J* = 8.8, 6.8 Hz, 1H), 1.87-1.79 (m, 2H), 1.44 (dd, *J* = 14.8, 2.4 Hz, 1H), 1.00 (s, 9H), 0.90 (dd, *J* = 14.0, 6.8 Hz, 6H);

**<sup>13</sup>C NMR (100 MHz, CDCl<sub>3</sub>)**  $\delta$  = 144.1, 141.2, 140.1, 128.9 (2C), 127.3, 127.2 (4C), 126.9 (2C), 80.2, 75.9, 52.6, 30.8, 30.4 (3C), 28.9, 19.9, 19.8;

**IR (film)** 2954, 2917, 2849, 1486, 1472, 1364, 1215, 1099, 838, 754, 697 cm<sup>-1</sup>;

**HRMS (DART)** calcd for C<sub>22</sub>H<sub>30</sub>O [M+ NH<sub>4</sub>]<sup>+</sup> m/z = 328.2640; found: 328.2632.

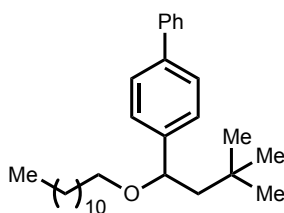

**4-(1-(Dodecyloxy)-3,3-dimethylbutyl)-1,1'-biphenyl (25):** Compound **25** was synthesized following the general procedure 1 (standard-scale), using *tert*-butyl iodide (36.8 mg, 0.2 mmol),

1-(vinylloxy)dodecane (169.6 mg, 0.8 mmol) and 4-biphenylmagnesium bromide (0.6 mL, 0.5 M solution in THF, 0.3 mmol). The product **25** was obtained as a colorless liquid (25 mg, 29% yield) after purification by column chromatography on silica gel with hexane/CH<sub>2</sub>Cl<sub>2</sub> (23:2) to hexane/CH<sub>2</sub>Cl<sub>2</sub> (9:1).

**<sup>1</sup>H NMR (400 MHz, CDCl<sub>3</sub>)**  $\delta$  = 7.61-7.55 (m, 4H), 7.45-7.41 (m, 2H), 7.36-7.32 (m, 3H), 4.34 (dd,  $J$  = 9.2, 2.8 Hz, 1H), 3.33-3.19 (m, 2H), 1.83 (dd,  $J$  = 14.4, 9.2 Hz, 1H), 1.58-1.52 (m, 2H), 1.46 (dd,  $J$  = 14.8, 2.8 Hz, 1H), 1.30-1.25 (m, 18H), 1.00 (s, 9H), 0.88 (t,  $J$  = 7.2 Hz, 3H);

**<sup>13</sup>C NMR (100 MHz, CDCl<sub>3</sub>)**  $\delta$  = 144.0, 141.2, 140.1, 128.9 (2C), 127.3, 127.2 (2C), 127.2 (2C), 126.9 (2C), 80.1, 69.0, 52.5, 32.1, 30.8, 30.4 (3C), 30.2, 29.8, 29.8, 29.8, 29.8, 29.6, 29.5, 26.5, 22.9, 14.3;

**IR (film)** 3028, 2923, 2853, 1486, 1465, 1363, 1101, 1008, 838, 753, 696 cm<sup>-1</sup>;

**HRMS (DART)** calcd for C<sub>30</sub>H<sub>46</sub>O [M+NH<sub>4</sub>]<sup>+</sup>  $m/z$  = 440.3892; found: 440.3886.

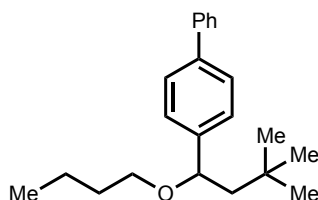

**4-(1-Butoxy-3,3-dimethylbutyl)-1,1'-biphenyl (26):** Compound **26** was synthesized following the general procedure 1 (standard-scale), using *tert*-butyl iodide (36.8 mg, 0.2 mmol), 1-(vinylloxy)butane (80.1 mg, 0.8 mmol) and 4-biphenylmagnesium bromide (0.6 mL, 0.5 M solution in THF, 0.3 mmol). The product **26** was obtained as a colorless liquid (26 mg, 42% yield) after purification by column chromatography on silica gel with hexane/CH<sub>2</sub>Cl<sub>2</sub> (22:3) to hexane/CH<sub>2</sub>Cl<sub>2</sub> (43:7).

**<sup>1</sup>H NMR (400 MHz, CDCl<sub>3</sub>)**  $\delta$  = 7.61-7.55 (m, 4H), 7.45-7.41 (m, 2H), 7.36-7.31 (m, 3H), 4.34 (dd,  $J$  = 8.8, 2.8 Hz, 1H), 3.33-3.20 (m, 2H), 1.82 (dd,  $J$  = 14.8, 8.8 Hz, 1H), 1.57-1.50 (m, 2H), 1.45 (dd,  $J$  = 14.4, 2.8 Hz, 1H), 1.40-1.34 (m, 2H), 1.00 (s, 9H), 0.89 (t,  $J$  = 7.6 Hz, 3H);

**<sup>13</sup>C NMR (100 MHz, CDCl<sub>3</sub>)**  $\delta$  = 144.0, 141.2, 140.1, 128.9 (2C), 127.3, 127.2 (2C), 127.2 (2C), 126.9 (2C), 80.1, 68.7, 52.5, 32.4, 30.8, 30.4 (3C), 19.7, 14.1;

**IR (film)** 3028, 2954, 2929, 2865, 1600, 1486, 1464, 1363, 1098, 1008, 837, 769, 753, 696 cm<sup>-1</sup>;

**HRMS (DART)** calcd for C<sub>22</sub>H<sub>30</sub>O [M+NH<sub>4</sub>]<sup>+</sup>  $m/z$  = 328.2640; found: 328.2638.

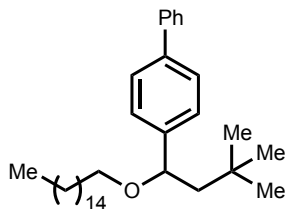

**4-(1-(Hexadecyloxy)-3,3-dimethylbutyl)-1,1'-biphenyl (27):** Compound **27** was synthesized following the general procedure 1 (standard-scale), using *tert*-butyl iodide (36.8 mg, 0.2 mmol), 1-(vinylloxy)hexadecane (214.7 mg, 0.8 mmol) and 4-biphenylmagnesium bromide (0.6 mL, 0.5 M solution in THF, 0.3 mmol). The product **27** was obtained as a colorless liquid (28 mg, 29% yield) after purification by column chromatography on silica gel with hexane/CH<sub>2</sub>Cl<sub>2</sub> (9:1) to hexane/CH<sub>2</sub>Cl<sub>2</sub> (22:3).

**<sup>1</sup>H NMR (400 MHz, CDCl<sub>3</sub>)**  $\delta$  = 7.61-7.55 (m, 4H), 7.45-7.41 (m, 2H), 7.36-7.31 (m, 3H), 4.33 (dd,  $J$  = 9.2, 2.8 Hz, 1H), 3.32-3.19 (m, 2H), 1.82 (dd,  $J$  = 14.4, 8.8 Hz, 1H), 1.59 -1.51 (m, 2H), 1.45 (dd,  $J$  = 14.4, 2.8 Hz, 1H), 1.28-1.25 (m, 26H), 1.00 (s, 9H), 0.88 (t,  $J$  = 6.8 Hz, 3H);

**<sup>13</sup>C NMR (100 MHz, CDCl<sub>3</sub>)**  $\delta$  = 144.0, 141.2, 140.1, 128.9 (2C), 127.3, 127.2 (4C), 126.9 (2C), 80.1, 69.0, 52.4, 32.1, 30.8, 30.4 (3C), 30.2, 29.9 (4C), 29.8 (2C), 29.8, 29.8, 29.6, 29.5, 26.5, 22.9, 14.3;

**IR (film)** 3028, 2922, 2852, 1600, 1486, 1465, 1363, 1100, 1008, 838, 753, 696 cm<sup>-1</sup>;

**HRMS (DART)** calcd for C<sub>34</sub>H<sub>54</sub>O [M+NH<sub>4</sub>]<sup>+</sup>  $m/z$  = 496.4518; found: 496.4529.

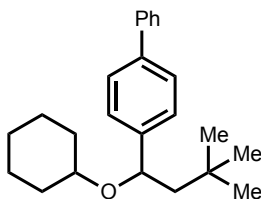

**4-(1-(Cyclohexyloxy)-3,3-dimethylbutyl)-1,1'-biphenyl (28):** Compound **28** was synthesized following the general procedure 1 (standard-scale), using *tert*-butyl iodide (36.8 mg, 0.2 mmol), (vinylloxy)cyclohexane (100.9 mg, 0.8 mmol) and 4-biphenylmagnesium bromide (0.6 mL, 0.5 M solution in THF, 0.3 mmol). The product **28** was obtained as a colorless liquid (28 mg, 41% yield) after purification by column chromatography on silica gel with hexane/CH<sub>2</sub>Cl<sub>2</sub> (21:4) to hexane/CH<sub>2</sub>Cl<sub>2</sub> (41:9).

**<sup>1</sup>H NMR (400 MHz, CDCl<sub>3</sub>)**  $\delta$  = 7.61-7.54 (m, 4H), 7.45-7.41 (m, 2H), 7.37-7.31 (m, 3H), 4.60 (dd,  $J$  = 9.2, 2.8 Hz, 1H), 3.17-3.10 (m, 1H), 2.05-2.02 (m, 1H), 1.83-1.62 (m, 4H), 1.42 (dd,  $J$  = 14.4, 2.8 Hz, 1H), 1.37-1.27 (m, 2H), 1.22-1.07 (m, 4H), 1.00 (s, 9H);

**<sup>13</sup>C NMR (100 MHz, CDCl<sub>3</sub>)**  $\delta$  = 144.9, 141.2, 139.9, 128.9 (2C), 127.2, 127.2 (2C), 127.1 (2C), 127.0 (2C), 76.5, 75.1, 52.9, 34.1, 31.8, 30.9, 30.4 (3C), 26.0, 24.6, 24.5;

**IR (film)** 3027, 2929, 2855, 1600, 1486, 1449, 1362, 1258, 1087, 1064, 838, 754, 696 cm<sup>-1</sup>;

**HRMS (DART)** calcd for C<sub>24</sub>H<sub>32</sub>O [M+NH<sub>4</sub>]<sup>+</sup>  $m/z$  = 354.2796; found: 354.2796.

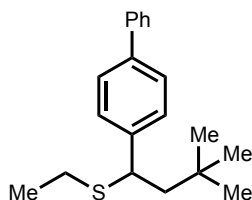

**(1-([1,1'-Biphenyl]-4-yl)-3,3-dimethylbutyl)(ethyl)sulfane (29):** Compound **29** was synthesized following the general procedure 1 (standard-scale), using *tert*-butyl iodide (36.8 mg, 0.2 mmol), ethyl vinyl sulfide (70.5 mg, 0.8 mmol) and 4-biphenylmagnesium bromide (0.6 mL, 0.5 M solution in THF, 0.3 mmol). The product **29** was obtained as a colorless liquid (18 mg, 31% yield) after purification by column chromatography on silica gel with hexane/CH<sub>2</sub>Cl<sub>2</sub> (49:1) to hexane/CH<sub>2</sub>Cl<sub>2</sub> (24:1).

**<sup>1</sup>H NMR (400 MHz, CDCl<sub>3</sub>)**  $\delta$  = 7.61-7.52 (m, 4H), 7.45-7.41 (m, 2H), 7.38-7.30 (m, 3H), 3.94 (dd,  $J$  = 8.4, 4.4 Hz, 1H), 2.30-2.17 (m, 2H), 1.98 (dd,  $J$  = 14.4, 8.4 Hz, 1H), 1.81 (dd,  $J$  = 14.0, 4.4 Hz, 1H), 1.16 (t,  $J$  = 7.2 Hz, 3H), 0.86 (s, 9H);

**<sup>13</sup>C NMR (100 MHz, CDCl<sub>3</sub>)**  $\delta$  = 143.7, 140.9, 139.6, 128.9 (2C), 128.5 (2C), 127.3, 127.1 (2C), 127.1 (2C), 50.1, 45.6, 31.8, 30.2 (3C), 25.4, 14.5;

**IR (film)** 3027, 2955, 2926, 2865, 1601, 1486, 1364, 1265, 1007, 843, 762, 696 cm<sup>-1</sup>;

**HRMS (DART)** calcd for C<sub>20</sub>H<sub>26</sub>S [M+NH<sub>4</sub>]<sup>+</sup>  $m/z$  = 316.2099; found: 316.2092.

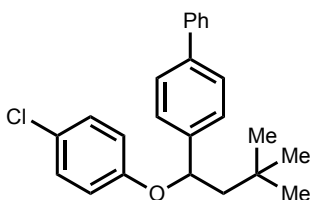

**4-(1-(4-Chlorophenoxy)-3,3-dimethylbutyl)-1,1'-biphenyl (30):** Compound **30** was synthesized following the general procedure 1 (standard-scale), using *tert*-butyl iodide (36.8 mg, 0.2 mmol), 1-chloro-4-(vinylloxy)benzene (123.2 mg, 0.8 mmol) and 4-biphenylmagnesium bromide (0.6 mL, 0.5 M solution in THF, 0.3 mmol). The product **30** was obtained as a colorless liquid (52 mg, 71% yield) after purification by column chromatography on silica gel with hexane/CH<sub>2</sub>Cl<sub>2</sub> (24:1) to hexane/CH<sub>2</sub>Cl<sub>2</sub> (47:3).

**<sup>1</sup>H NMR (400 MHz, CDCl<sub>3</sub>)**  $\delta$  = 7.58-7.55 (m, 4H), 7.45-7.32 (m, 5H), 7.16 (d,  $J$  = 9.2 Hz, 2H), 6.80 (d,  $J$  = 8.8 Hz, 2H), 5.20 (dd,  $J$  = 9.6, 2.0 Hz, 1H), 2.08 (dd,  $J$  = 15.2, 9.6 Hz, 1H), 1.64 (dd,  $J$  = 14.8, 2.0 Hz, 1H), 1.05 (s, 9H);

**<sup>13</sup>C NMR (100 MHz, CDCl<sub>3</sub>)**  $\delta$  = 156.7, 142.3, 140.9, 140.5, 129.4 (2C), 128.9 (2C), 127.6 (2C), 127.4, 127.2 (2C), 126.1 (2C), 125.6, 117.2 (2C), 78.4, 52.8, 31.0, 30.3 (3C);

**IR (film)** 3028, 2953, 2866, 1596, 1487, 1364, 1235, 1168, 1052, 1006, 990, 821, 752, 696, 665 cm<sup>-1</sup>;

**HRMS (DART)** calcd for C<sub>24</sub>H<sub>25</sub>ClO [M+NH<sub>4</sub>]<sup>+</sup>  $m/z$  = 382.1937; found: 382.1935.

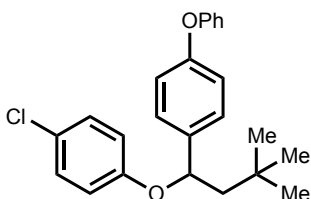

**1-Chloro-4-(3,3-dimethyl-1-(4-phenoxyphenyl)butoxy)benzene (31):** Compound **31** was synthesized following the general procedure 1 (standard-scale), using *tert*-butyl iodide (36.8 mg, 0.2 mmol), 1-chloro-4-(vinylloxy)benzene (123.2 mg, 0.8 mmol) and 4-Phenoxyphenylmagnesium bromide (0.6 mL, 0.5 M solution in THF, 0.3 mmol). The product **31** was obtained as a colorless liquid (50 mg, 66% yield) after purification by column chromatography on silica gel with hexane/CH<sub>2</sub>Cl<sub>2</sub> (24:1) to hexane/CH<sub>2</sub>Cl<sub>2</sub> (47:3).



**<sup>1</sup>H NMR (400 MHz, CDCl<sub>3</sub>)**  $\delta$  = 7.35-7.30 (m, 2H), 7.27 (d,  $J$  = 8.4 Hz, 2H), 7.15-7.08 (m, 3H), 7.01-6.94 (m, 4H), 6.76 (d,  $J$  = 8.8 Hz, 2H), 5.14 (dd,  $J$  = 9.6, 2.0 Hz, 1H), 2.03 (dd,  $J$  = 14.8, 9.2 Hz, 1H), 1.59 (dd,  $J$  = 14.8, 2.0 Hz, 1H), 1.02 (s, 9H);

**<sup>13</sup>C NMR (100 MHz, CDCl<sub>3</sub>)**  $\delta$  = 157.1, 156.7, 137.9, 129.9 (2C), 129.3 (2C), 127.1 (2C), 125.5, 123.5 (2C), 119.2 (2C), 119.0 (2C), 117.2 (2C), 78.2, 52.8, 30.9, 30.3 (3C);

**IR (film)** 3038, 2953, 2866, 1589, 1486, 1231, 1165, 1051, 989, 821, 752, 691, 665 cm<sup>-1</sup>;

**HRMS (DART)** calcd for C<sub>24</sub>H<sub>25</sub>ClO<sub>2</sub> [M-H]<sup>-</sup>  $m/z$  = 379.1464; found: 379.1480.

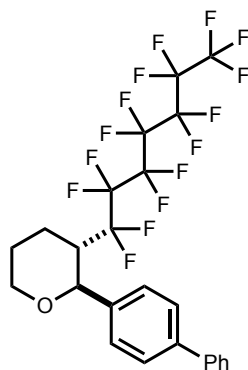

***trans*-2-([1,1'-Biphenyl]-4-yl)-3-(perfluoroheptyl)tetrahydro-2H-pyran (32):** Compound **32** was synthesized following the general procedure 1 (standard-scale), using 1-bromo-1,1,2,2,3,3,4,4,5,5,6,6,7,7,7-pentadecafluoroheptane (89.7 mg, 0.2 mmol), 3,4-dihydro-2H-pyran (67.2 mg, 0.8 mmol) and 4-biphenylmagnesium bromide (0.6 mL, 0.5 M solution in THF, 0.3 mmol). The product **32** was obtained as a brown solid (38 mg, 31% yield) after purification by column chromatography on silica gel with hexane/CH<sub>2</sub>Cl<sub>2</sub> (24:1) to hexane/CH<sub>2</sub>Cl<sub>2</sub> (47:3).

**mp:** 84-85 °C;

**<sup>1</sup>H NMR (400 MHz, CDCl<sub>3</sub>)**  $\delta$  = 7.61-7.58 (m, 4H), 7.45-7.41 (m, 4H), 7.36-7.32 (m, 1H), 4.55 (d,  $J$  = 9.6 Hz, 1H), 4.13-4.09 (m, 1H), 3.63-3.57 (m, 1H), 2.78-2.71 (m, 1H), 2.29-2.26 (m, 1H), 1.87-1.79 (m, 3H);

**<sup>13</sup>C NMR (100 MHz, CDCl<sub>3</sub>)**  $\delta$  = 141.3, 141.0, 139.7 (d,  $J$  = 1.5 Hz), 128.9 (3C), 127.8 (d,  $J$  = 1.8 Hz), 127.4, 127.3 (4C), 121.6-107.7 (7C), 79.5, 68.5, 45.0 (t,  $J$  = 18.6 Hz), 24.8, 23.7;

**<sup>19</sup>F NMR (376 MHz, CDCl<sub>3</sub>)**  $\delta$  = -104.64 to -105.53 (m, 1F), -116.41 to -123.85 (m, 14F);

**IR (film)** 3062, 2959, 2860, 1990, 1971, 1684, 1558, 1456, 1219, 772, 684, 659 cm<sup>-1</sup>;

**HRMS (DART)** calcd for C<sub>24</sub>H<sub>17</sub>F<sub>15</sub>O [M+NH<sub>4</sub>]<sup>+</sup>  $m/z$  = 624.1383; found: 624.1398.

The stereochemistry of compound **32** was studied by 2D NOESY Spectrum (spectral data, compound 32). The absence of  $^1\text{H}$ - $^1\text{H}$  interaction between CH proton “a” and CH proton “b” indicates that both vicinal protons are in the *trans* diastereomer.

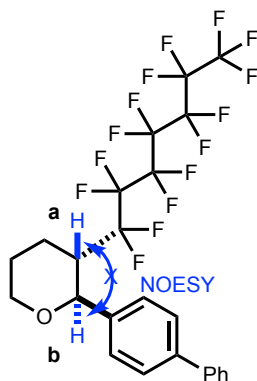

**Figure S4:** Confirmed the structure of **32** as *trans* based on NOESY NMR.

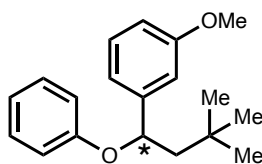

**1-(3,3-Dimethyl-1-phenoxybutyl)-3-methoxybenzene (4a):** Compound **4a** was synthesized following the general procedure 2, using *tert*-butyl bromide (27.4 mg, 0.2 mmol), phenyl vinyl ether (96.1 mg, 0.8 mmol) and 3-methoxyphenylmagnesium bromide (0.3 mL, 1.0 M solution in THF, 0.3 mmol). The product **4a** was obtained as a colorless liquid (33 mg, 58% yield) after purification by column chromatography on silica gel with hexane/ $\text{CH}_2\text{Cl}_2$  (9:1) to hexane/ $\text{CH}_2\text{Cl}_2$  (22:3)

$^1\text{H}$  NMR (400 MHz,  $\text{CDCl}_3$ )  $\delta$  = 7.28-7.18 (m, 3H), 6.95-6.84 (m, 5H), 6.78 (dd,  $J$  = 8.0, 2.4 Hz, 1H), 5.19 (dd,  $J$  = 9.6, 2.0 Hz, 1H), 3.80 (s, 3H), 2.06 (dd,  $J$  = 14.8, 9.6 Hz, 1H), 1.61 (dd,  $J$  = 14.8, 2.0 Hz, 1H), 1.05 (s, 9H); Spectral data matched compound **4**.

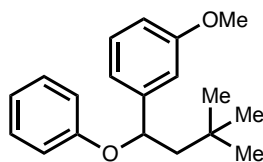

**1-(3,3-Dimethyl-1-phenoxybutyl)-3-methoxybenzene (4)-gram-scale:** Compound **4** was synthesized following the general procedure 1, using *tert*-butyl iodide (1.0 g, 5.4 mmol), phenyl vinyl ether (2.6 g, 21.7 mmol) and 3-methoxyphenylmagnesium bromide (8.1 mL, 1.0 M solution in THF, 8.1 mmol). The product **4** was obtained as a colorless liquid (1.02 g, 66% yield) after purification by column chromatography on silica gel with hexane/CH<sub>2</sub>Cl<sub>2</sub> (9:1) to hexane/CH<sub>2</sub>Cl<sub>2</sub> (22:3)

**<sup>1</sup>H NMR (400 MHz, CDCl<sub>3</sub>)**  $\delta$  = 7.27-7.17 (m, 3H), 6.95-6.83 (m, 5H), 6.77 (dd,  $J$  = 8.4, 2.4 Hz, 1H), 5.18 (dd,  $J$  = 9.6, 2.0 Hz, 1H), 3.79 (s, 3H), 2.06 (dd,  $J$  = 14.8, 9.6 Hz, 1H), 1.60 (dd,  $J$  = 14.4, 2.4 Hz, 1H), 1.04 (s, 9H); Spectral data matched compound **4**.

## 7. References

1. T. Asakawa, A. Kanazawa, and S. Aoshima. *Macromolecules*, **2020**, *53*, 6887-6897.

## 8. Spectral data

**Compound 4. Top:  $^1\text{H}$  NMR ( $\text{CDCl}_3$ , 400 MHz). Bottom:  $^{13}\text{C}$  NMR ( $\text{CDCl}_3$ , 100 MHz)**

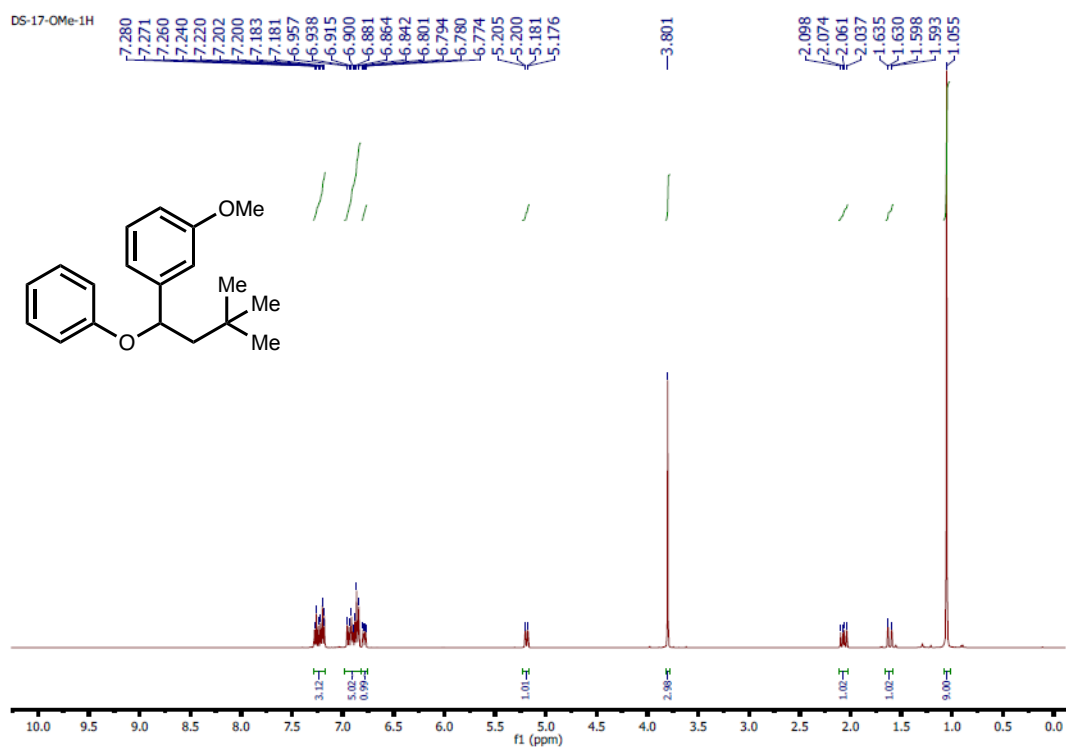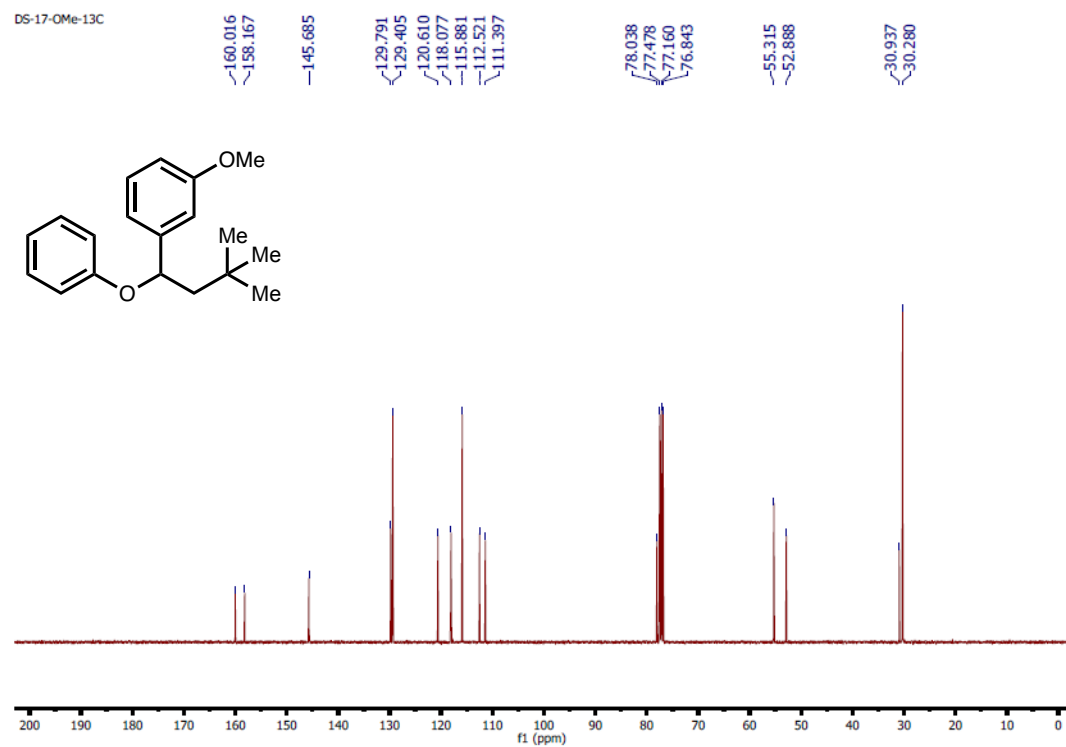

**Compound 5. Top:  $^1\text{H}$  NMR ( $\text{CDCl}_3$ , 400 MHz). Bottom:  $^{13}\text{C}$  NMR ( $\text{CDCl}_3$ , 100 MHz)**

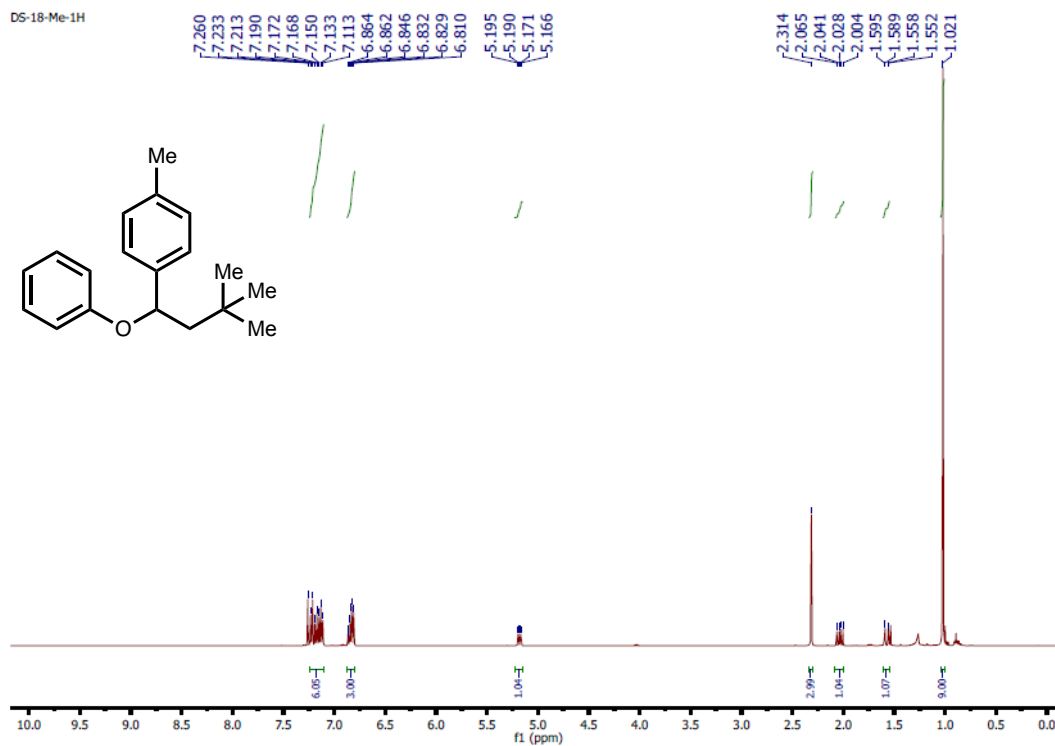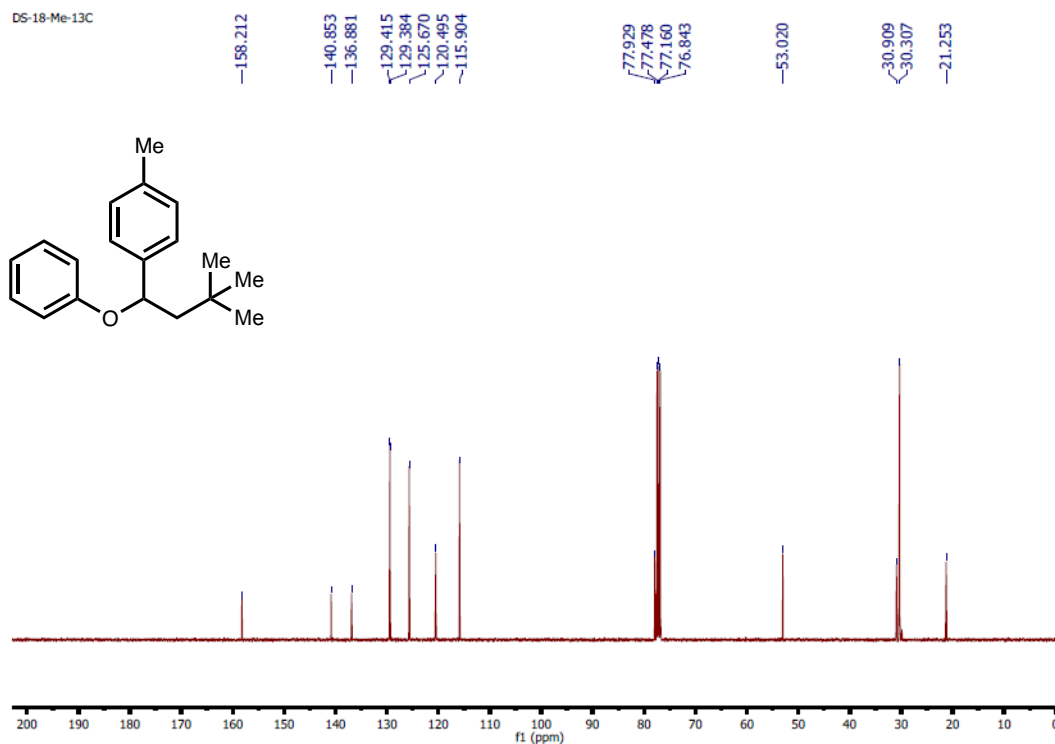

**Compound 6. Top:  $^1\text{H}$  NMR ( $\text{CDCl}_3$ , 400 MHz). Bottom:  $^{13}\text{C}$  NMR ( $\text{CDCl}_3$ , 100 MHz)**

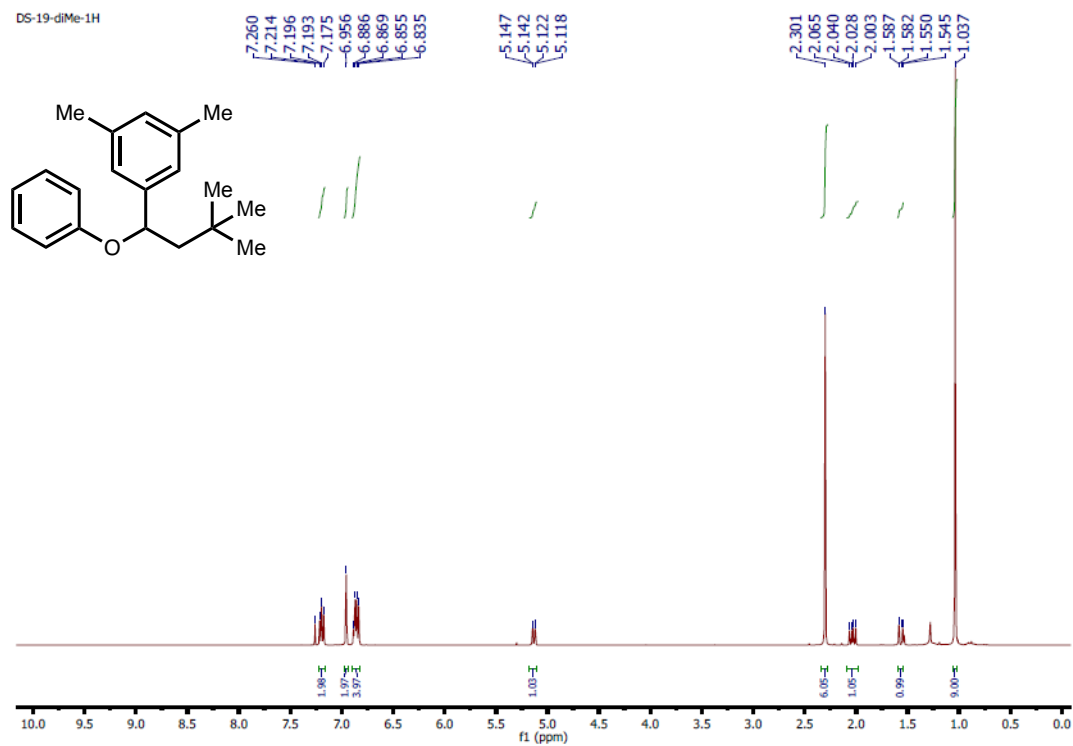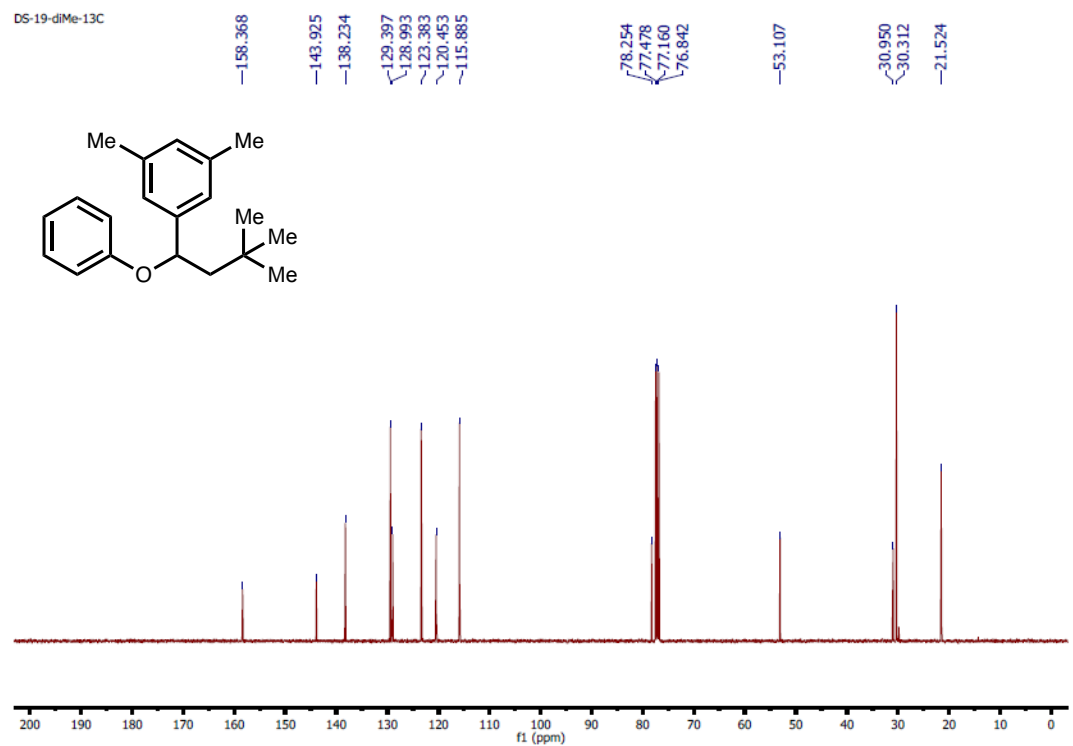

Compound 7. Top:  $^1\text{H}$  NMR ( $\text{CDCl}_3$ , 400 MHz). Bottom:  $^{13}\text{C}$  NMR ( $\text{CDCl}_3$ , 100 MHz)

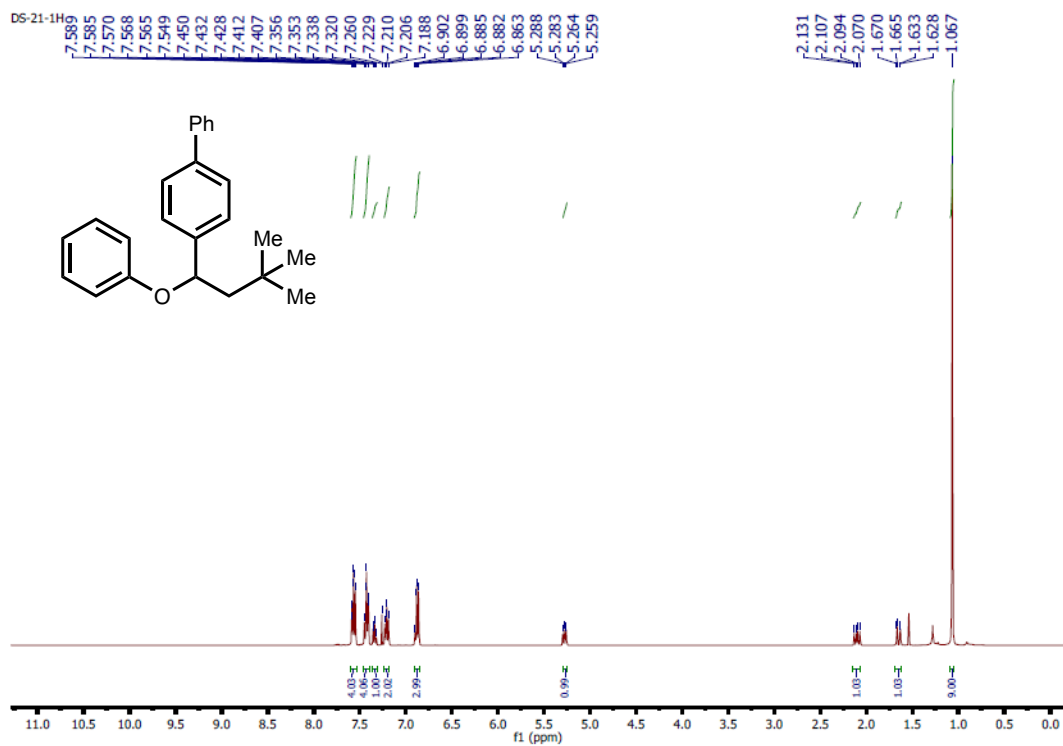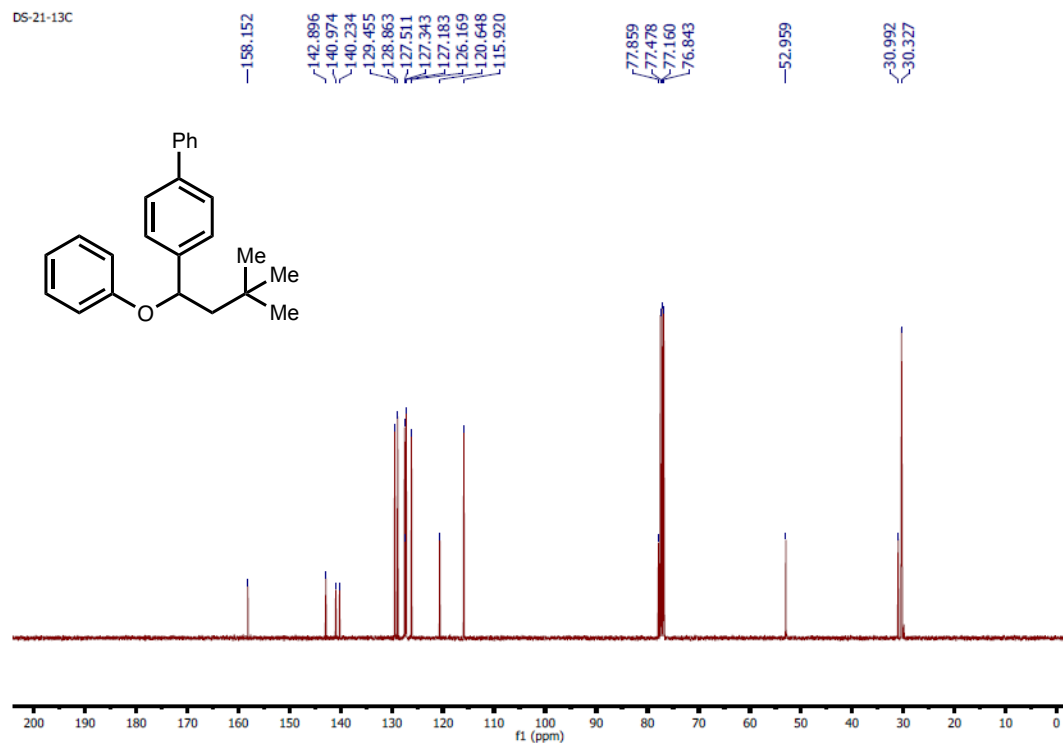

**Compound 8. Top:  $^1\text{H}$  NMR ( $\text{CDCl}_3$ , 400 MHz). Bottom:  $^{13}\text{C}$  NMR ( $\text{CDCl}_3$ , 100 MHz)**

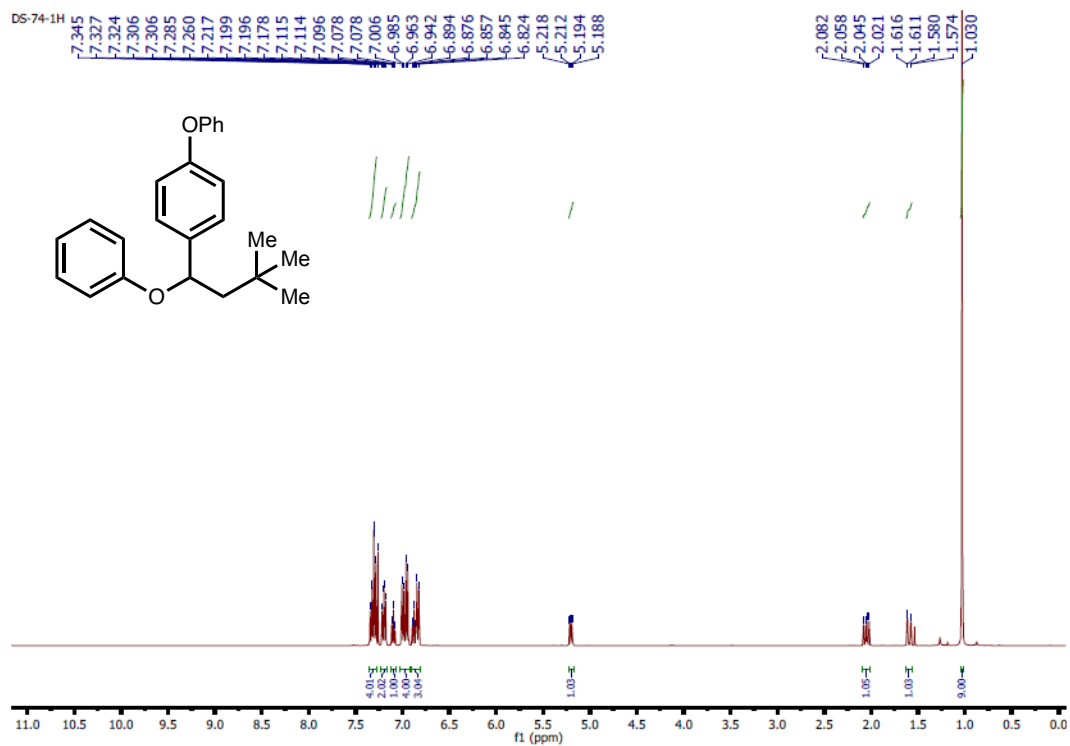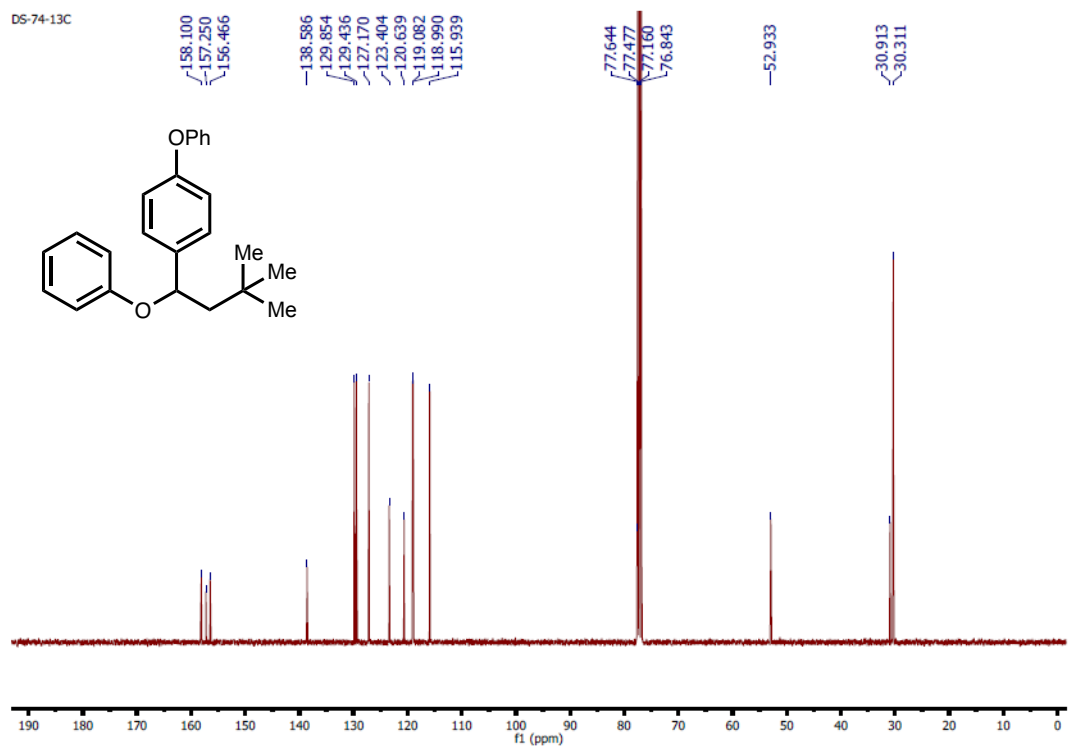



**Compound 9. Top:  $^1\text{H}$  NMR ( $\text{CDCl}_3$ , 400 MHz). Bottom:  $^{13}\text{C}$  NMR ( $\text{CDCl}_3$ , 100 MHz)**

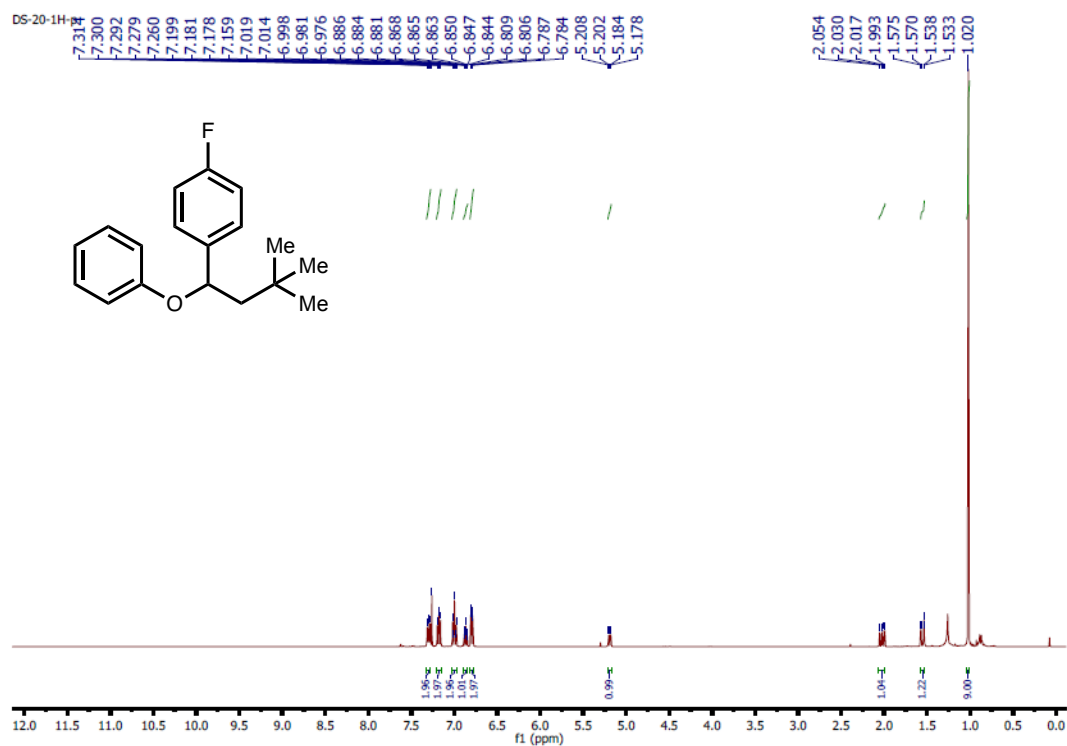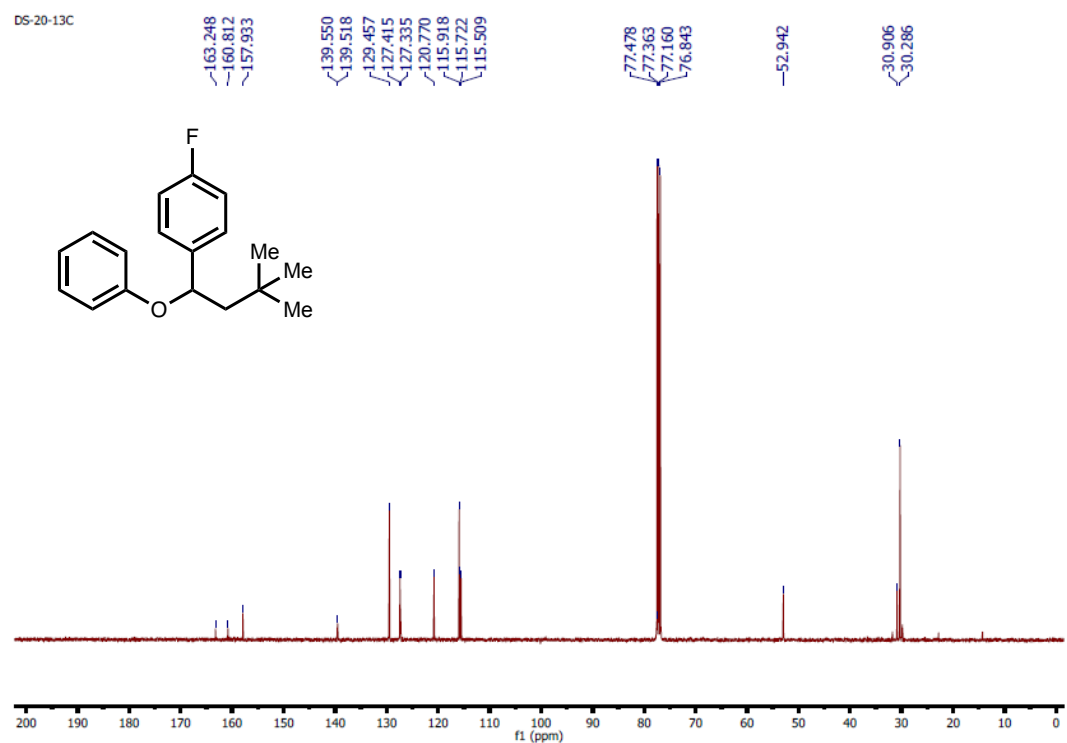

**Compound 9.  $^{19}\text{F}$  NMR ( $\text{CDCl}_3$ , 376 MHz)**

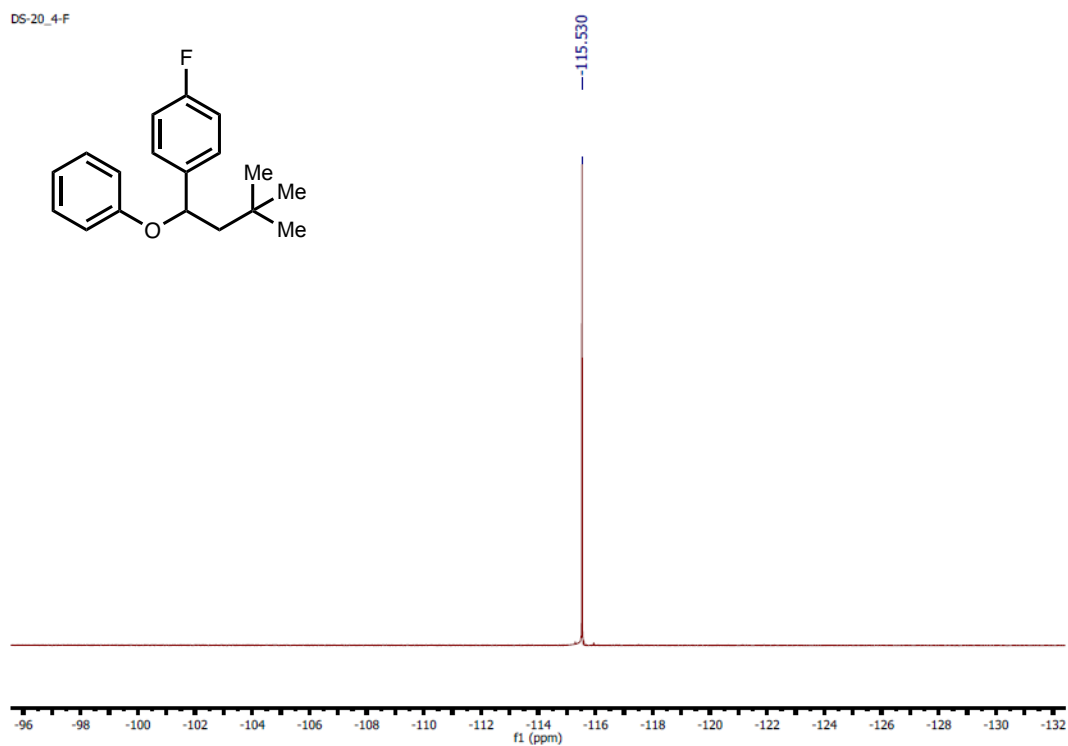

**Compound 10. Top:  $^1\text{H}$  NMR ( $\text{CDCl}_3$ , 400 MHz). Bottom:  $^{13}\text{C}$  NMR ( $\text{CDCl}_3$ , 100 MHz)**

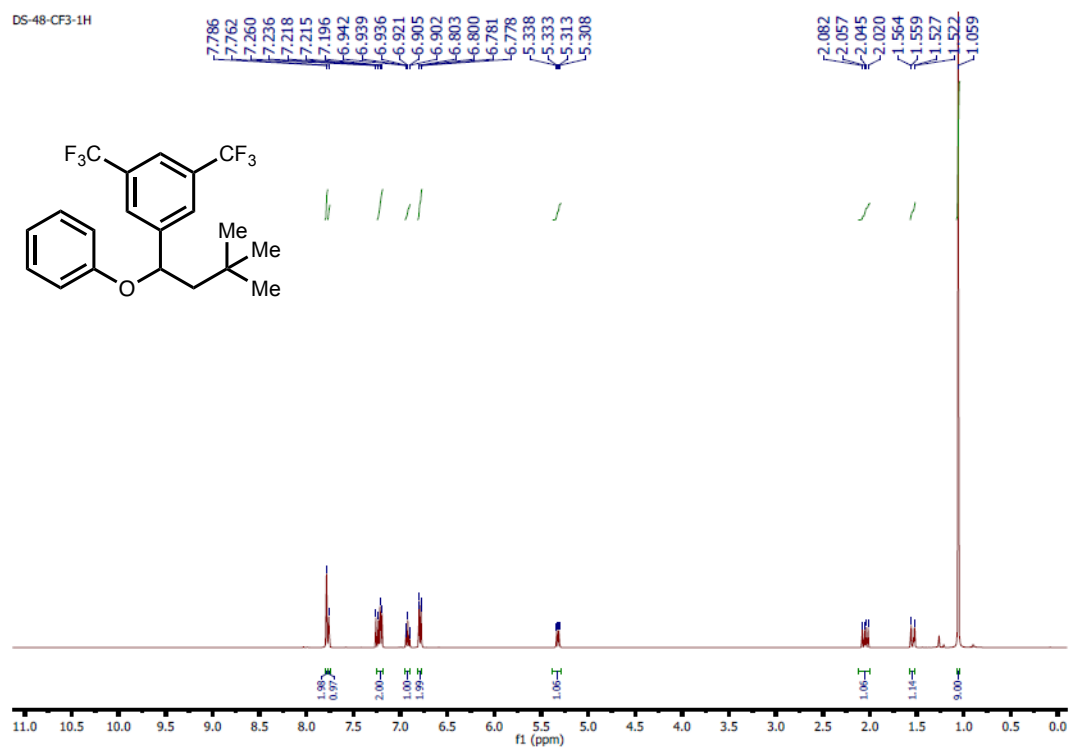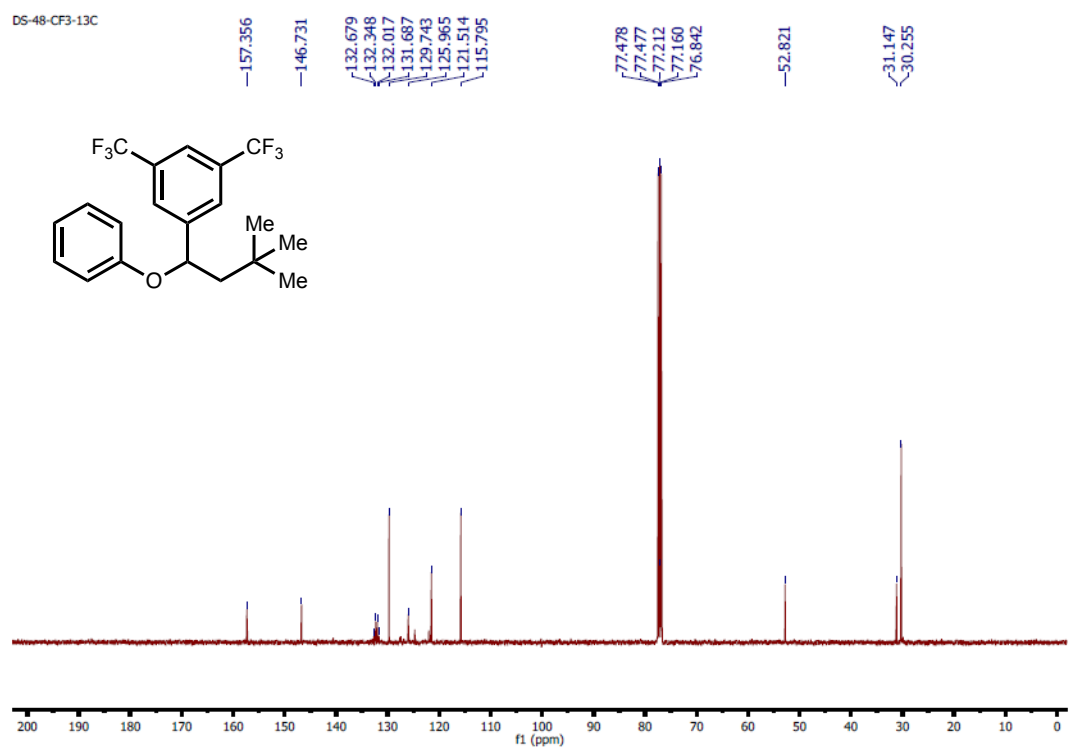

**Compound 10.  $^{19}\text{F}$  NMR ( $\text{CDCl}_3$ , 376 MHz)**

DS-48-CF3-F

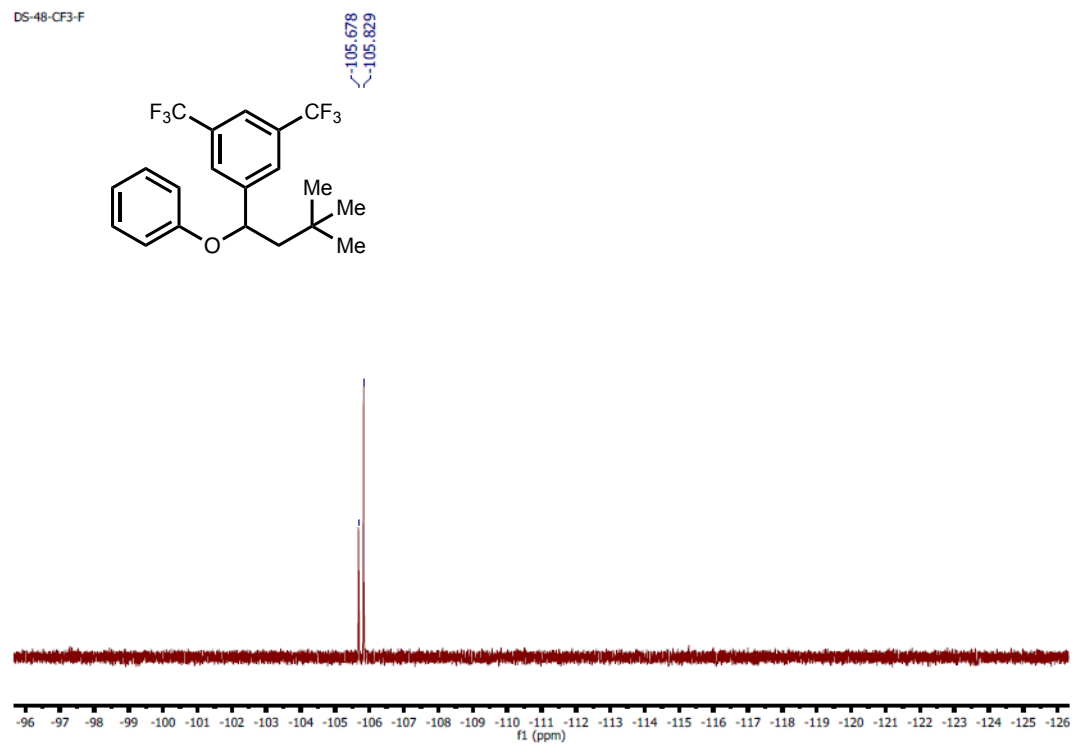

Compound 11. Top:  $^1\text{H}$  NMR ( $\text{CDCl}_3$ , 400 MHz). Bottom:  $^{13}\text{C}$  NMR ( $\text{CDCl}_3$ , 100 MHz)

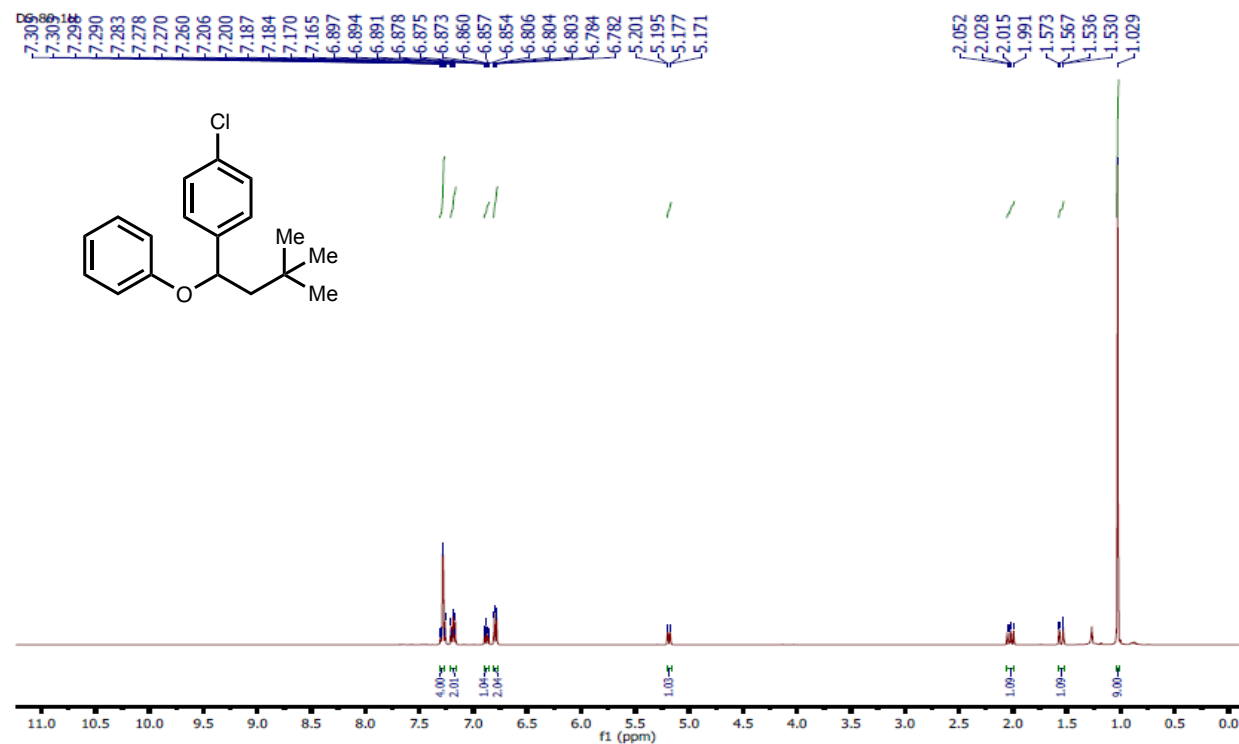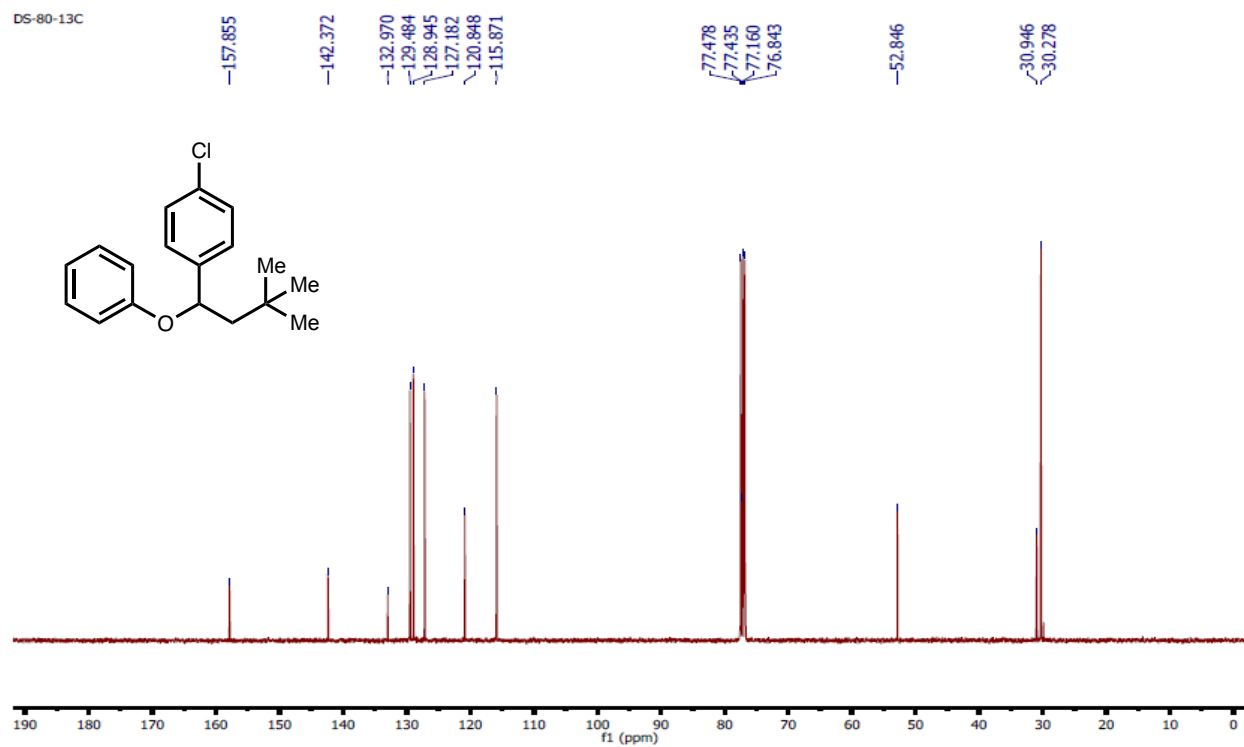

Compound 12. Top:  $^1\text{H}$  NMR ( $\text{CDCl}_3$ , 400 MHz). Bottom:  $^{13}\text{C}$  NMR ( $\text{CDCl}_3$ , 100 MHz)

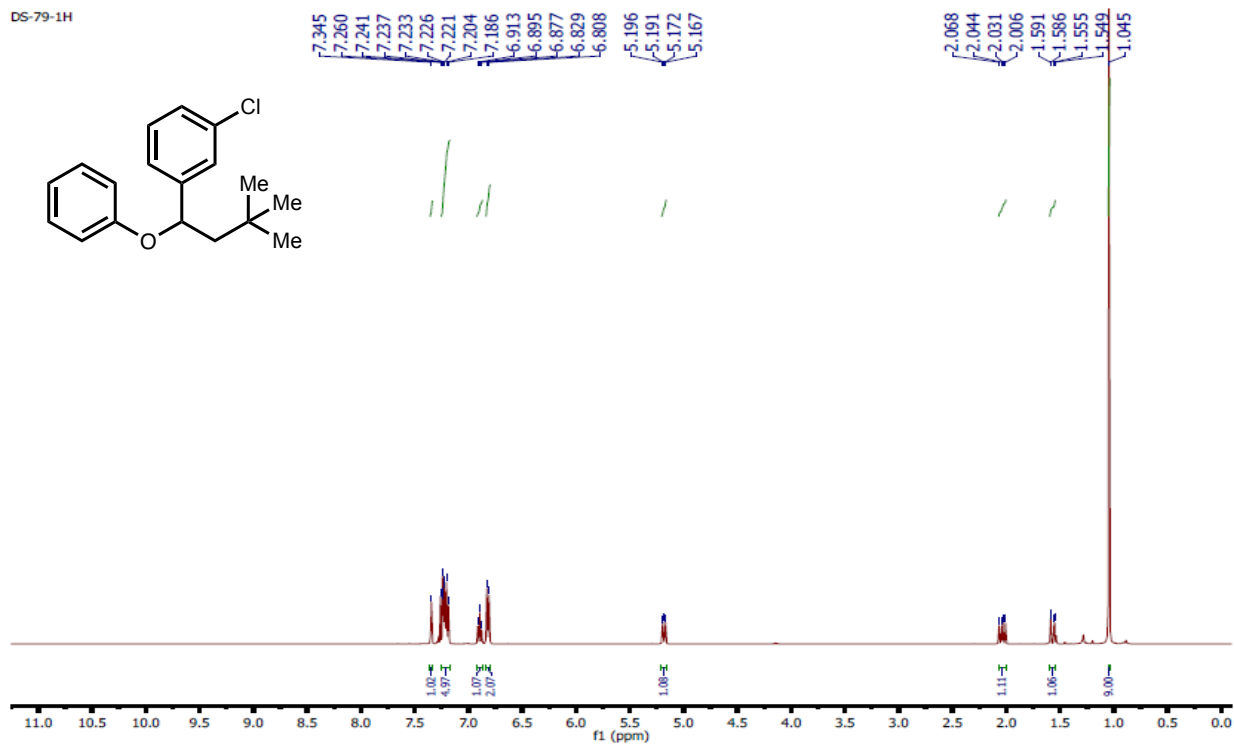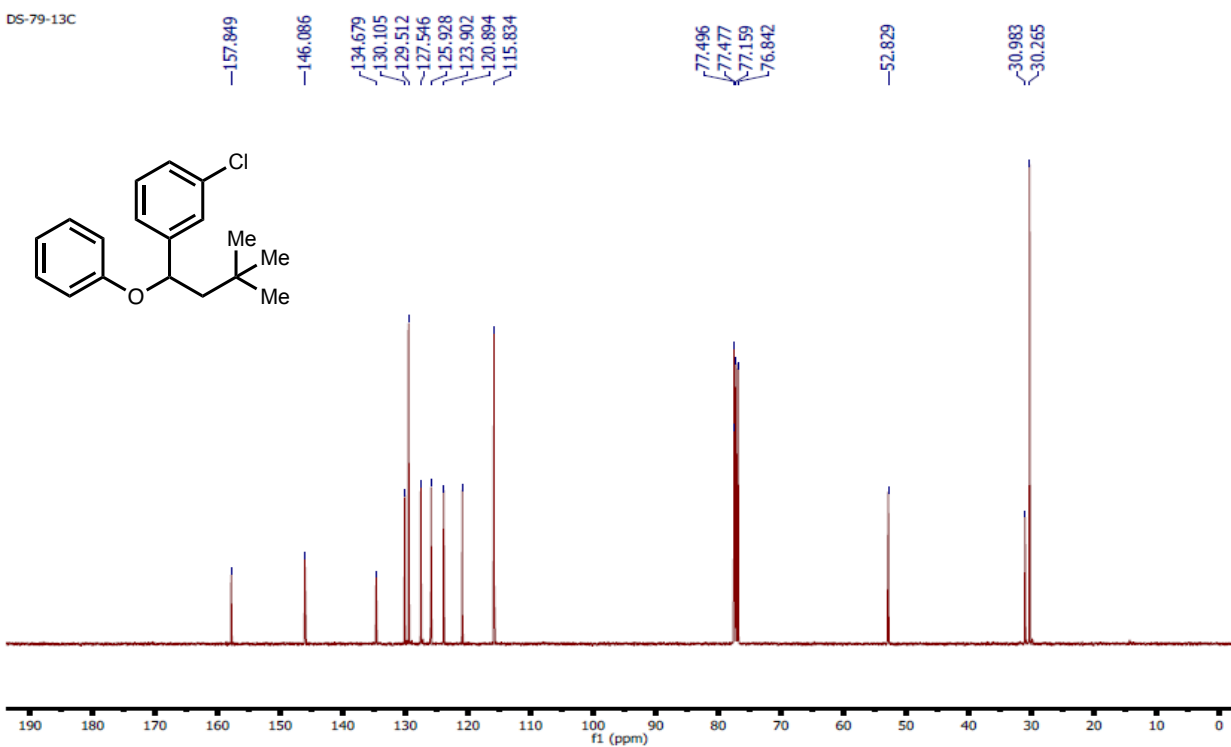

**Compound 13. Top:  $^1\text{H}$  NMR ( $\text{CDCl}_3$ , 400 MHz). Bottom:  $^{13}\text{C}$  NMR ( $\text{CDCl}_3$ , 100 MHz)**

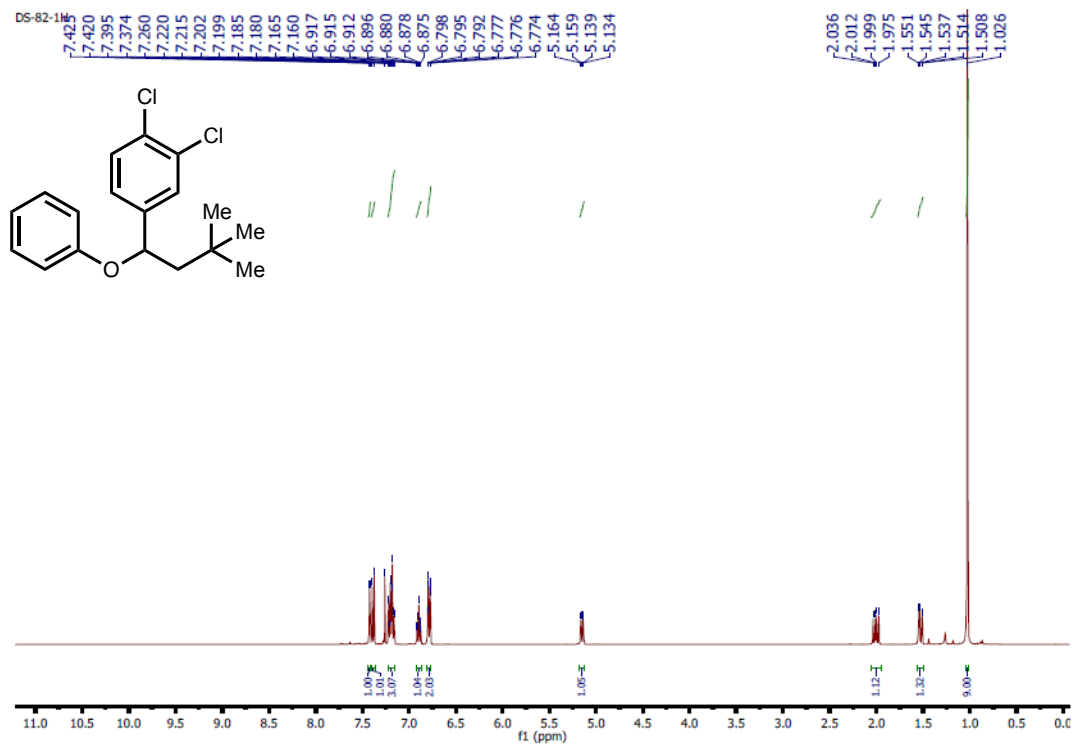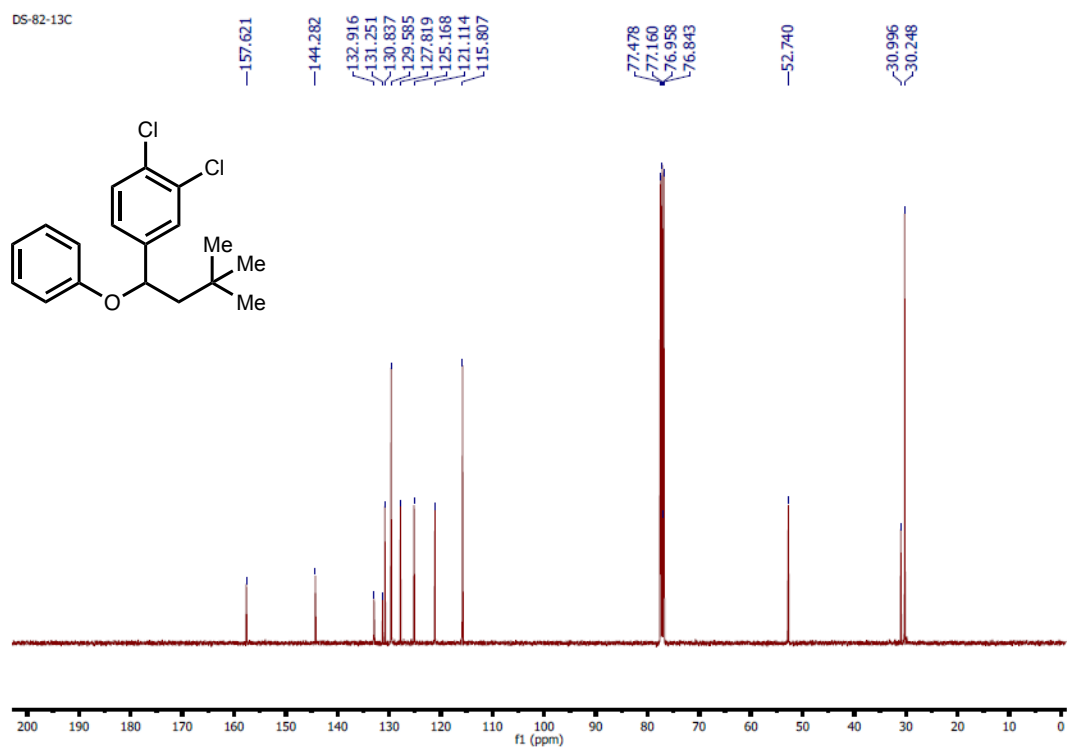

**Compound 14. Top:  $^1\text{H}$  NMR ( $\text{CDCl}_3$ , 400 MHz). Bottom:  $^{13}\text{C}$  NMR ( $\text{CDCl}_3$ , 100 MHz)**

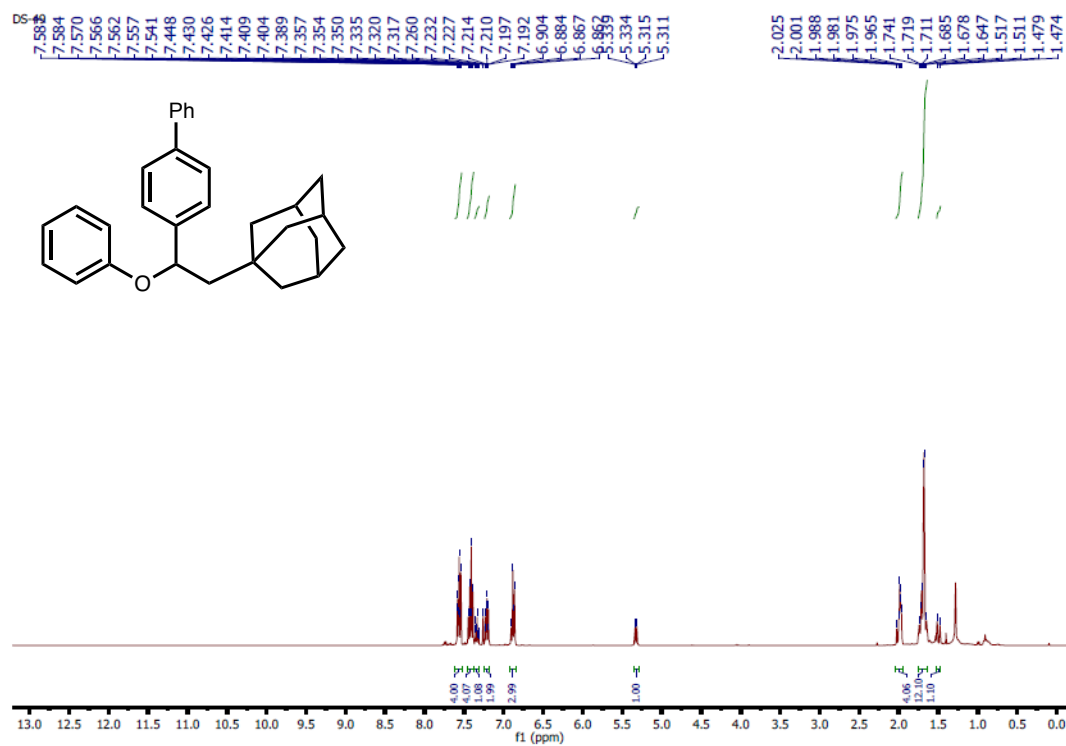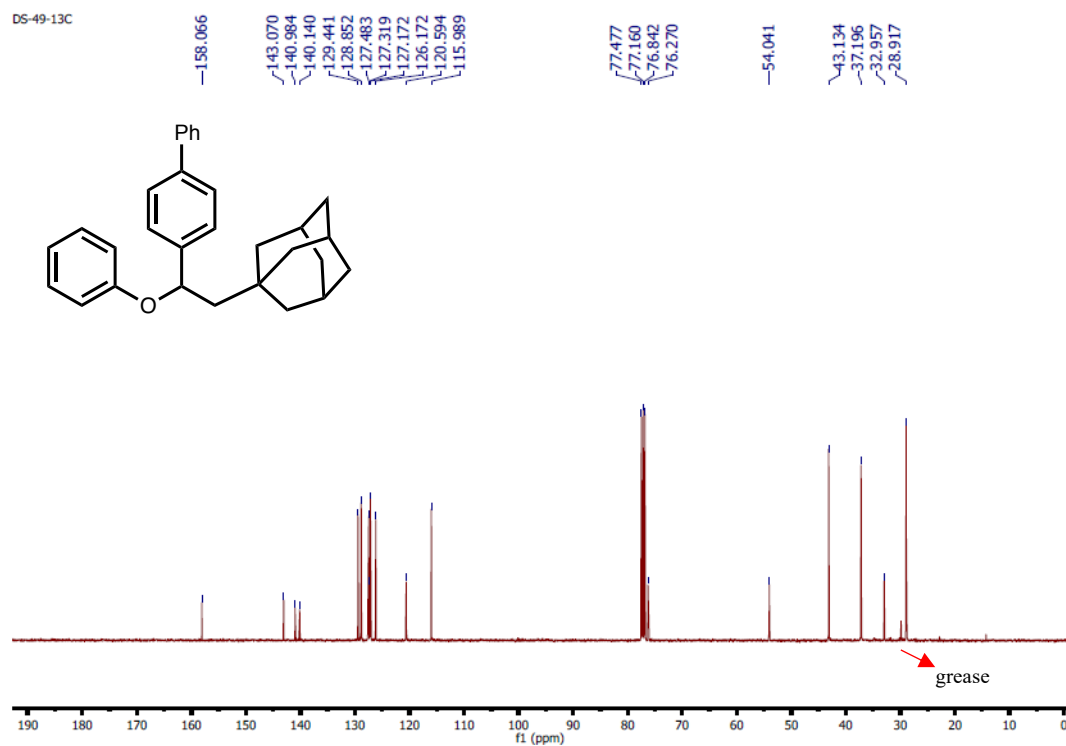



Compound 16. Top:  $^1\text{H}$  NMR ( $\text{CDCl}_3$ , 400 MHz). Bottom:  $^{13}\text{C}$  NMR ( $\text{CDCl}_3$ , 100 MHz)

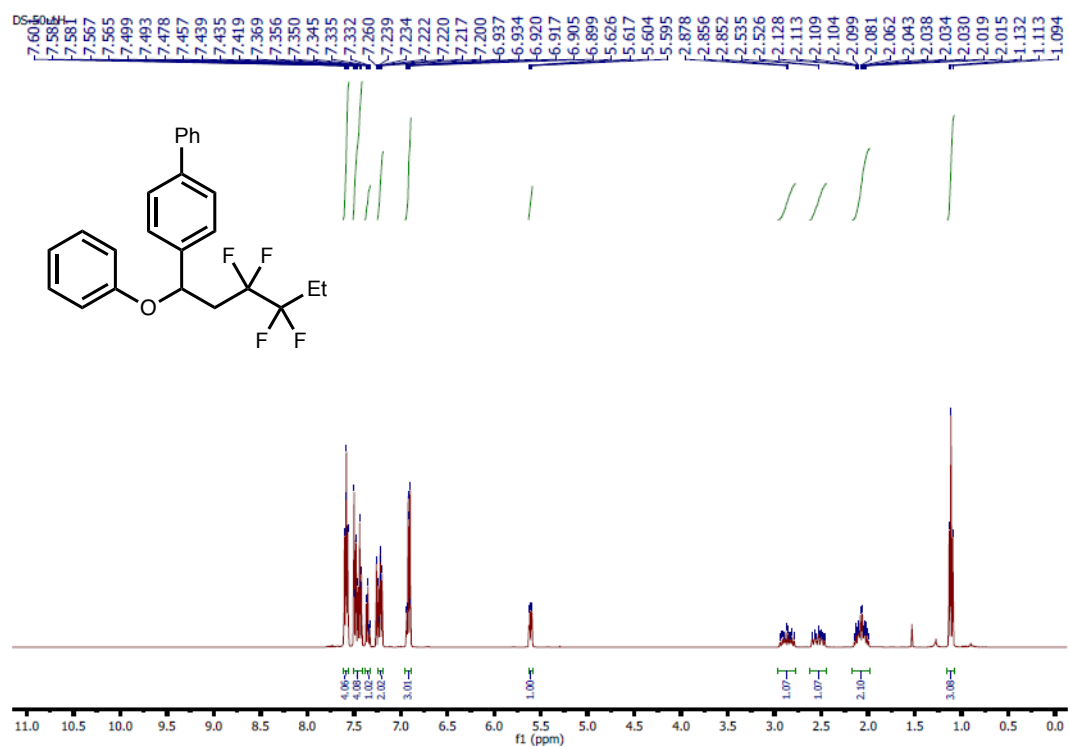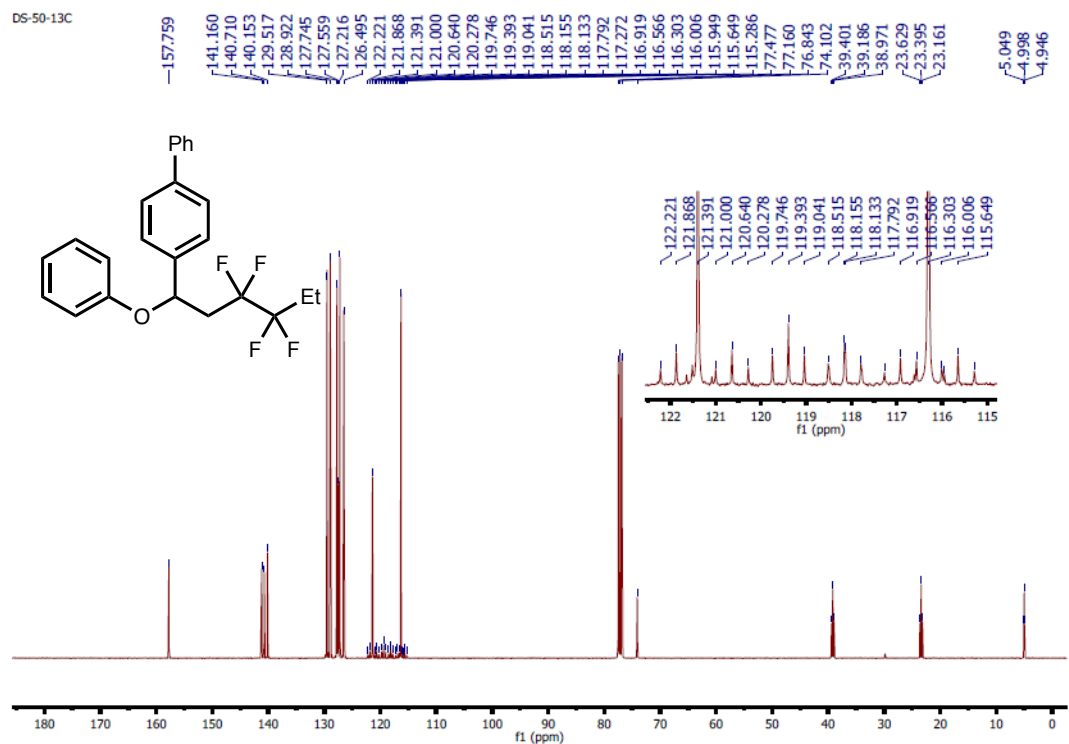

**Compound 16.  $^{19}\text{F}$  NMR ( $\text{CDCl}_3$ , 376 MHz)**

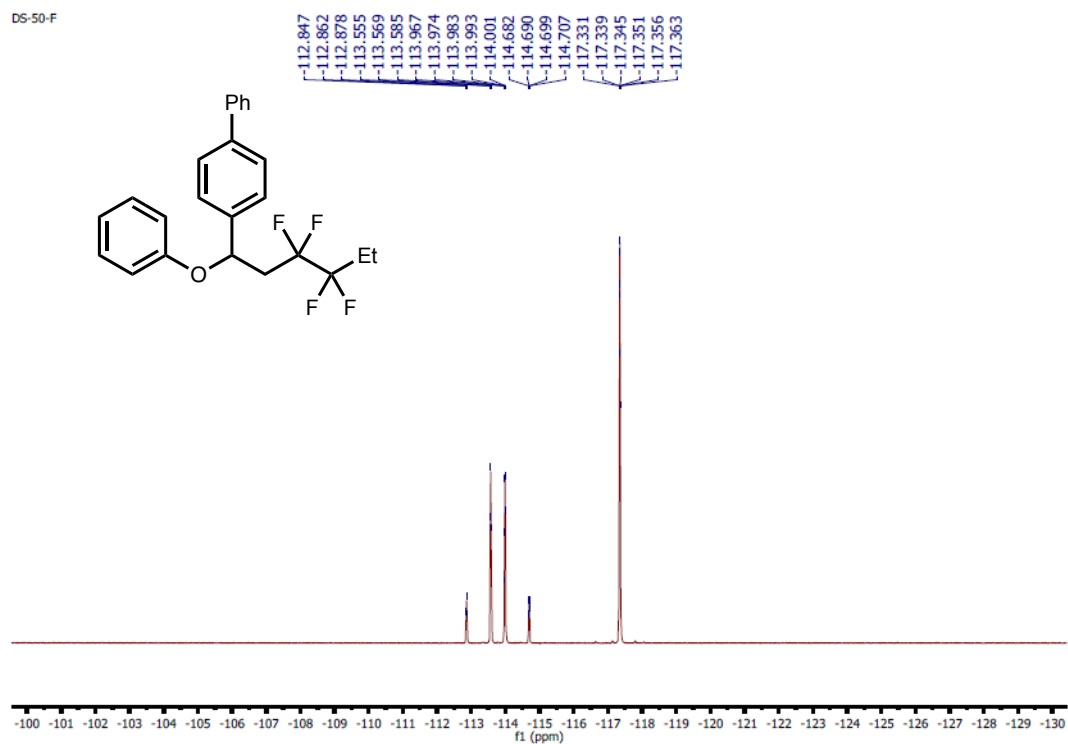

**Compound 17. Top:  $^1\text{H}$  NMR ( $\text{CDCl}_3$ , 400 MHz). Bottom:  $^{13}\text{C}$  NMR ( $\text{CDCl}_3$ , 100 MHz)**

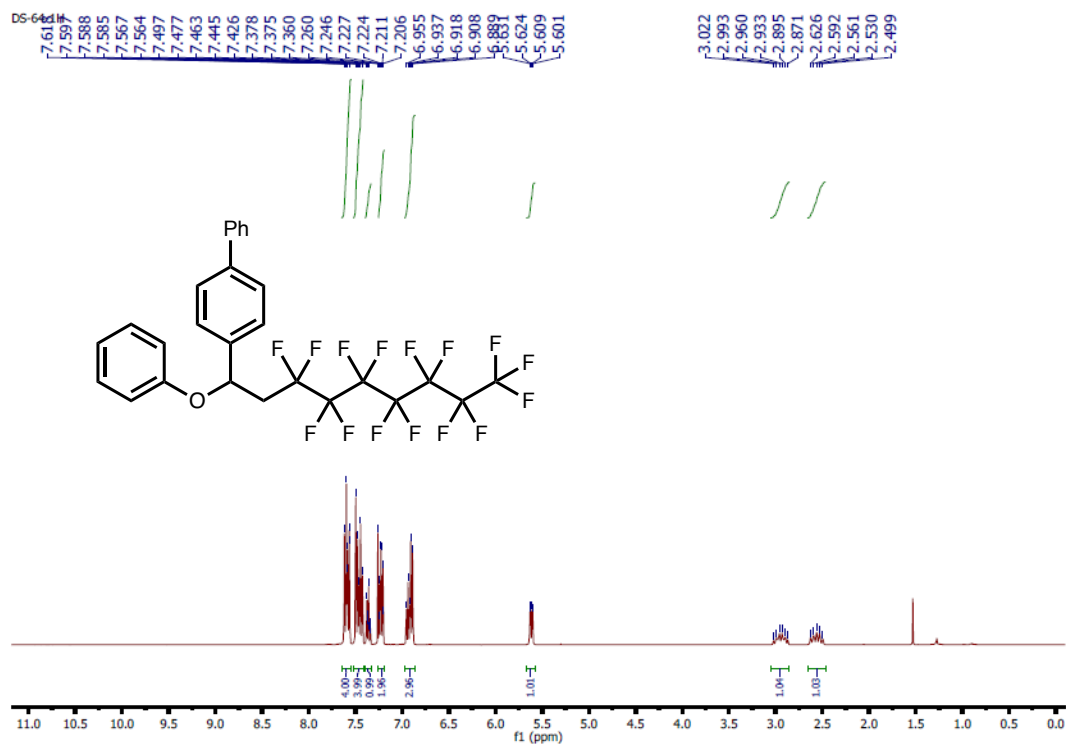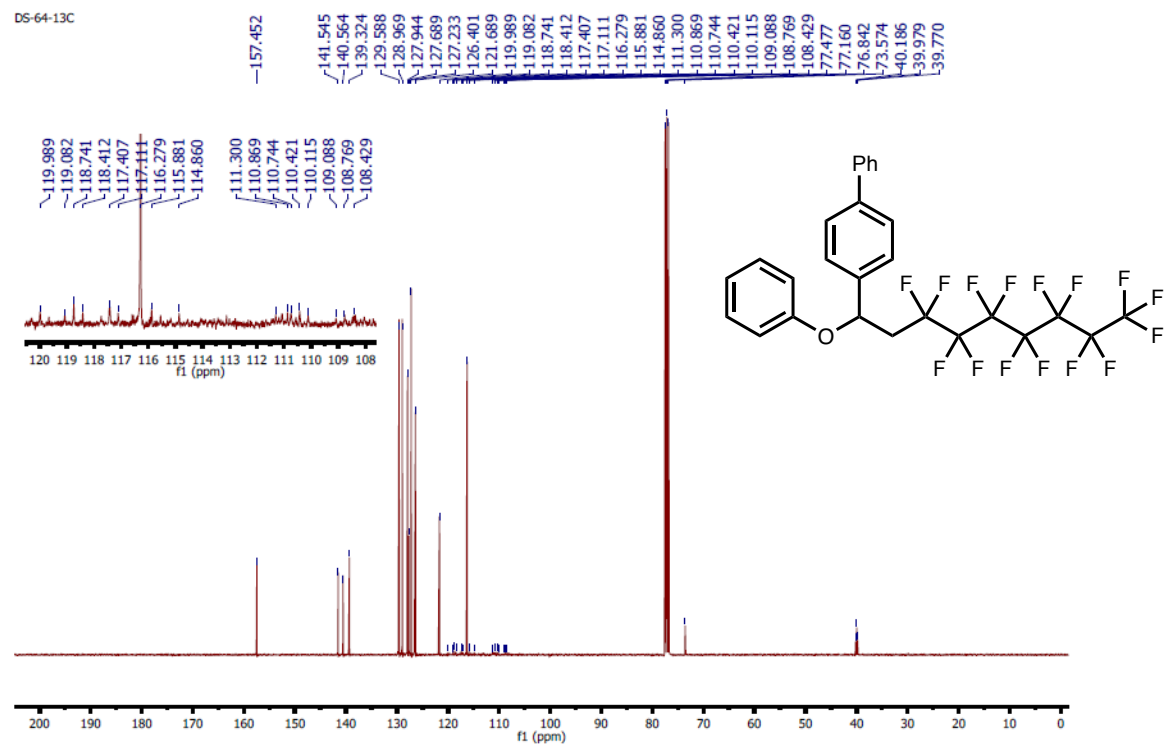

**Compound 17.  $^{19}\text{F}$  NMR ( $\text{CDCl}_3$ , 376 MHz)**

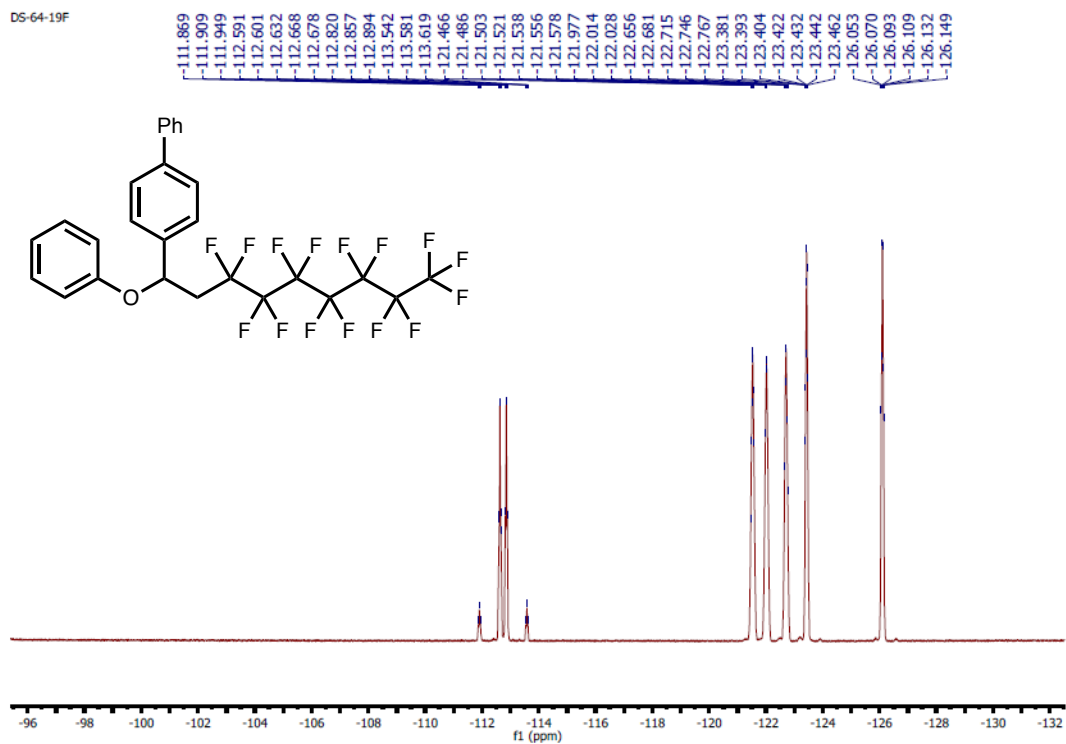

Compound 18. Top:  $^1\text{H}$  NMR ( $\text{CDCl}_3$ , 400 MHz). Bottom:  $^{13}\text{C}$  NMR ( $\text{CDCl}_3$ , 100 MHz)

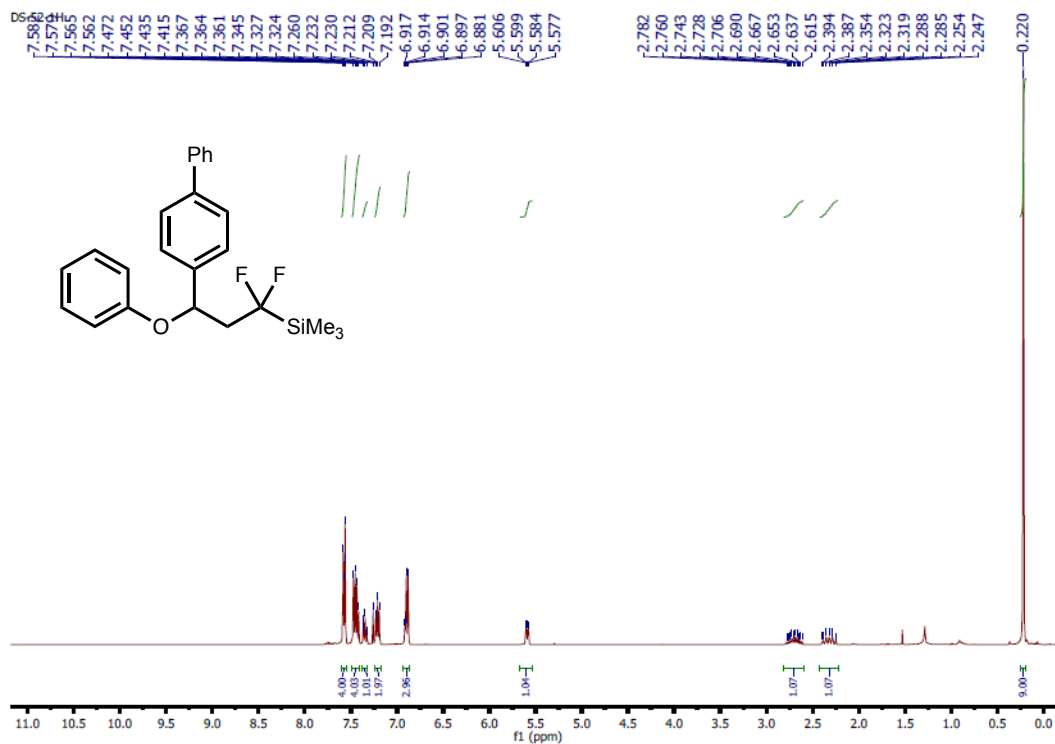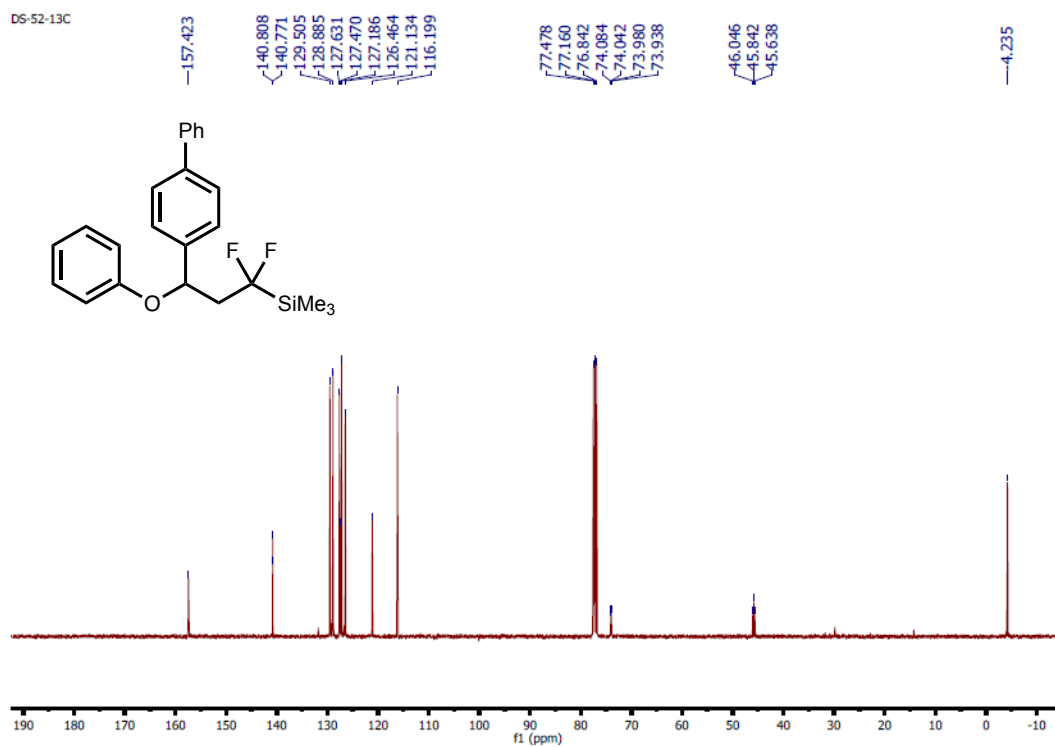

**Compound 18.  $^{19}\text{F}$  NMR ( $\text{CDCl}_3$ , 376 MHz)**

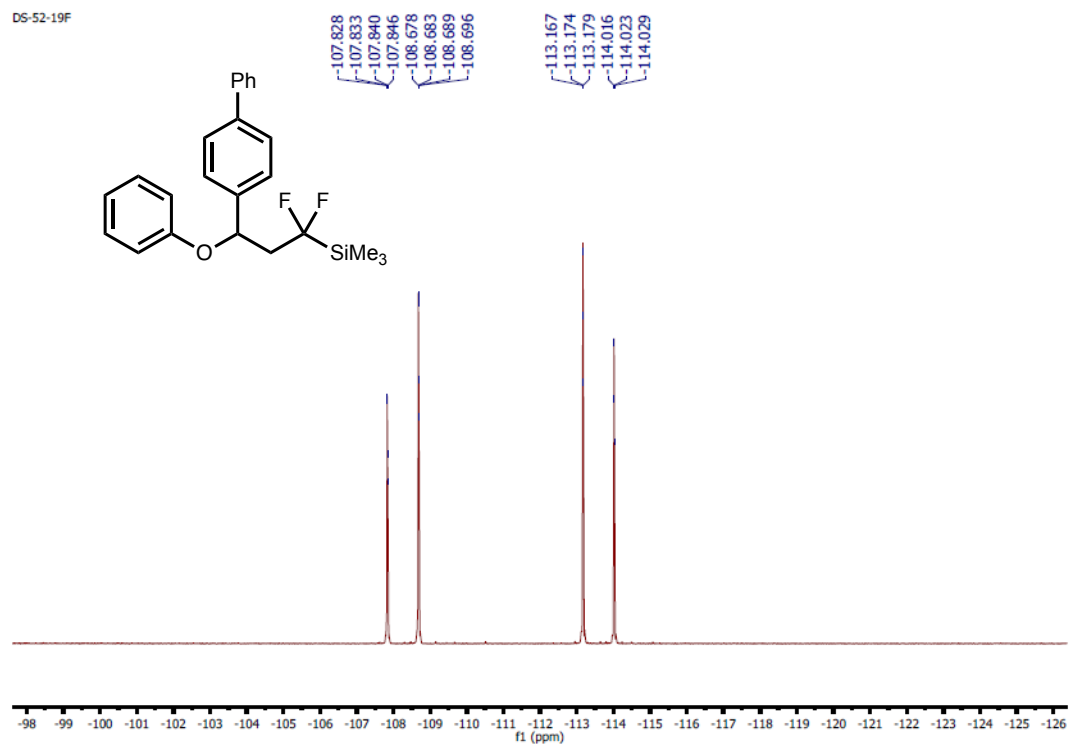

Compound 19. Top:  $^1\text{H}$  NMR ( $\text{CDCl}_3$ , 400 MHz). Bottom:  $^{13}\text{C}$  NMR ( $\text{CDCl}_3$ , 100 MHz)

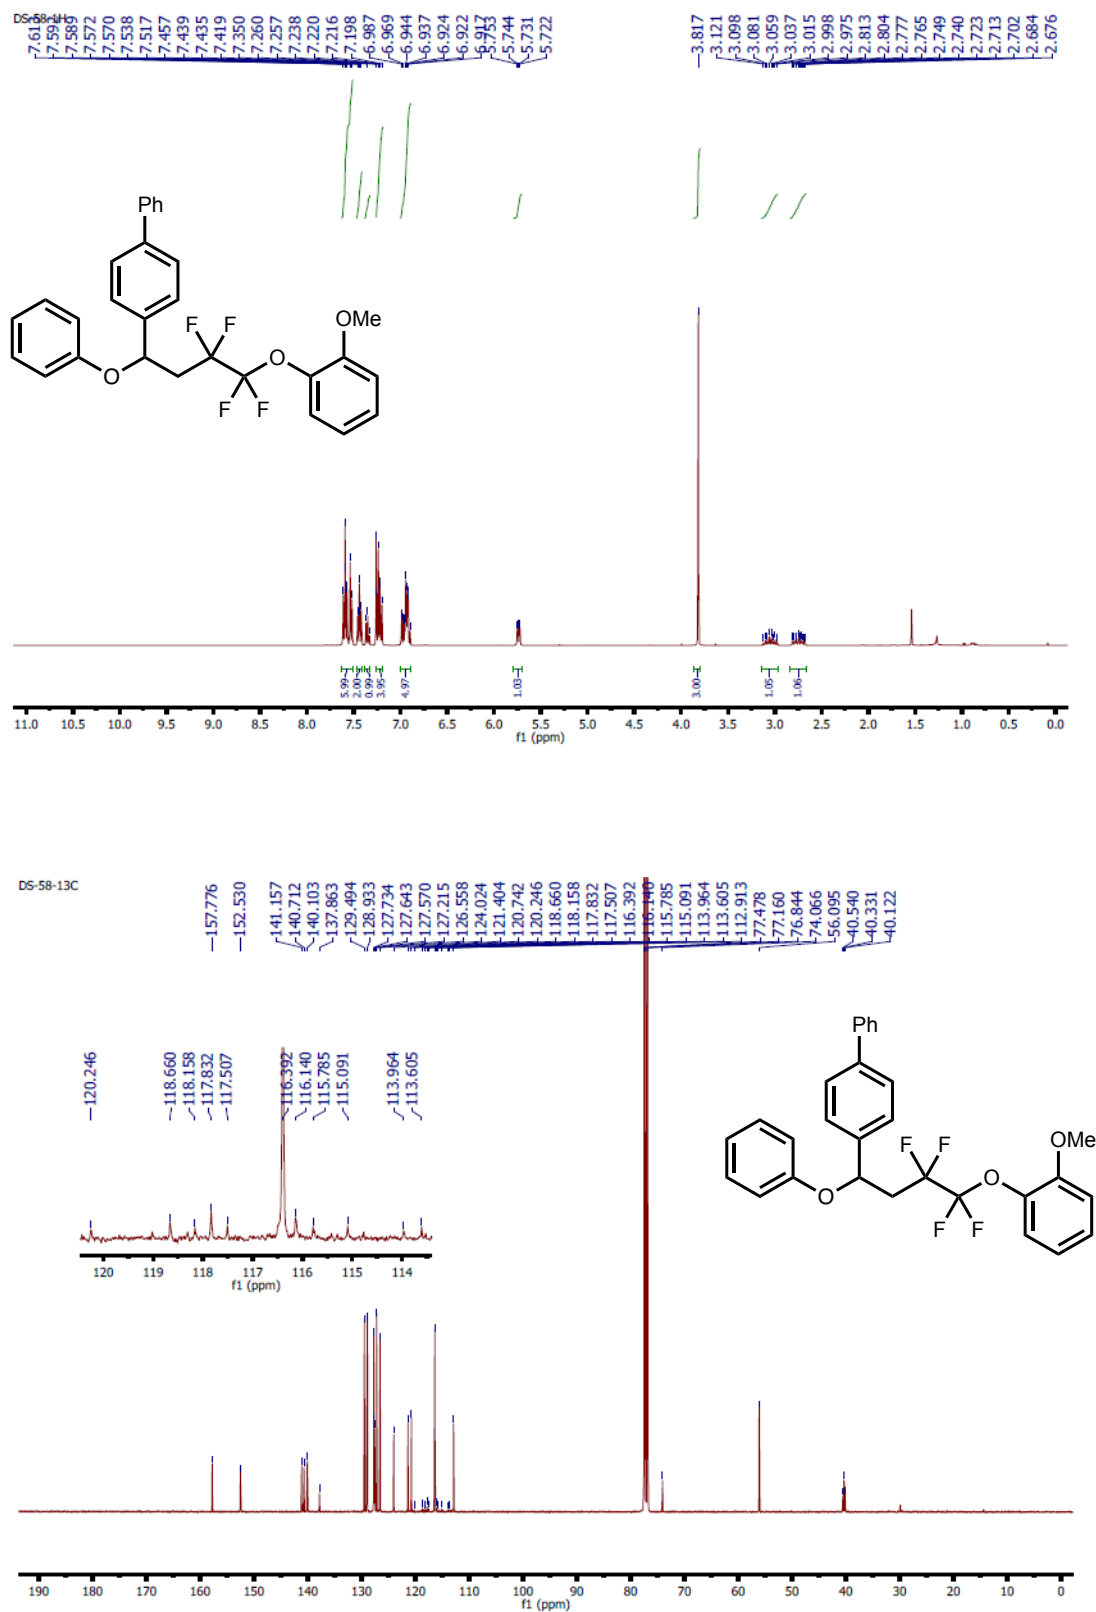

**Compound 19.  $^{19}\text{F}$  NMR ( $\text{CDCl}_3$ , 376 MHz)**

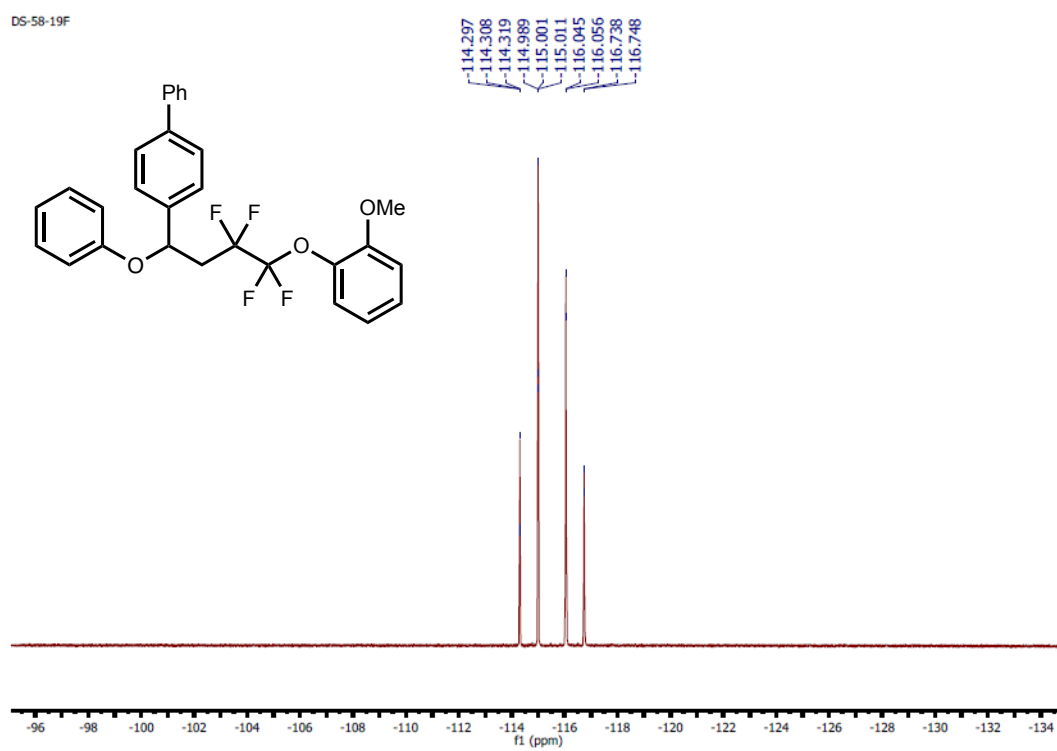



Compound 20. Top:  $^1\text{H}$  NMR ( $\text{CDCl}_3$ , 400 MHz). Bottom:  $^{13}\text{C}$  NMR ( $\text{CDCl}_3$ , 100 MHz)

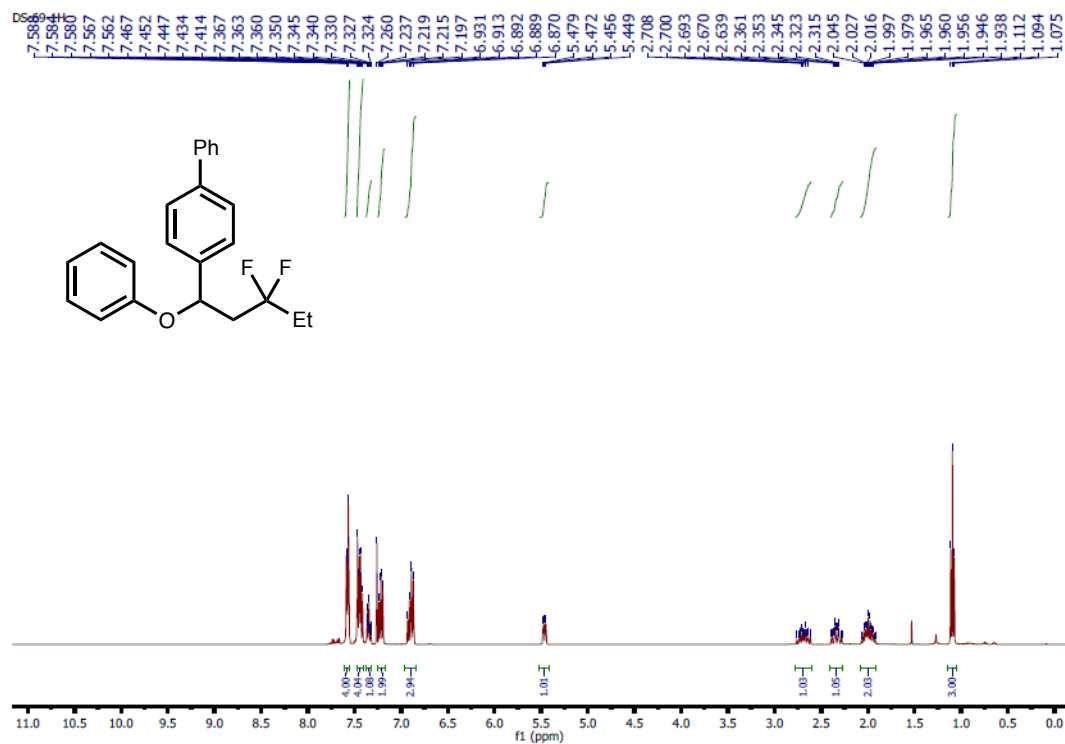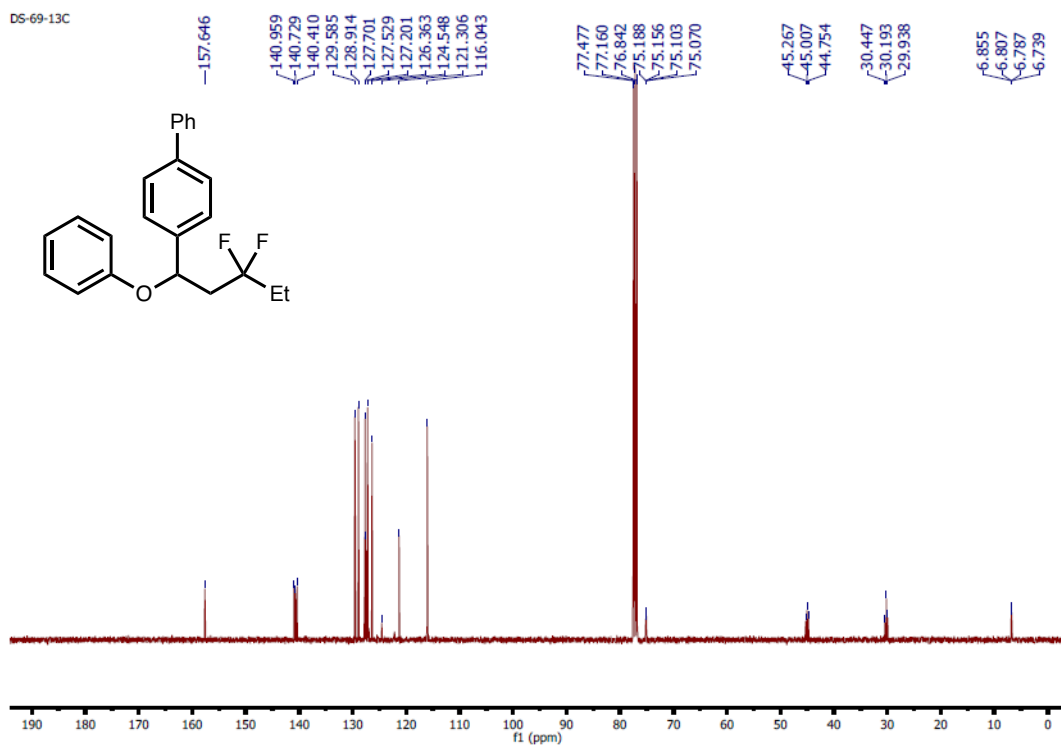

**Compound 20.  $^{19}\text{F}$  NMR ( $\text{CDCl}_3$ , 376 MHz)**

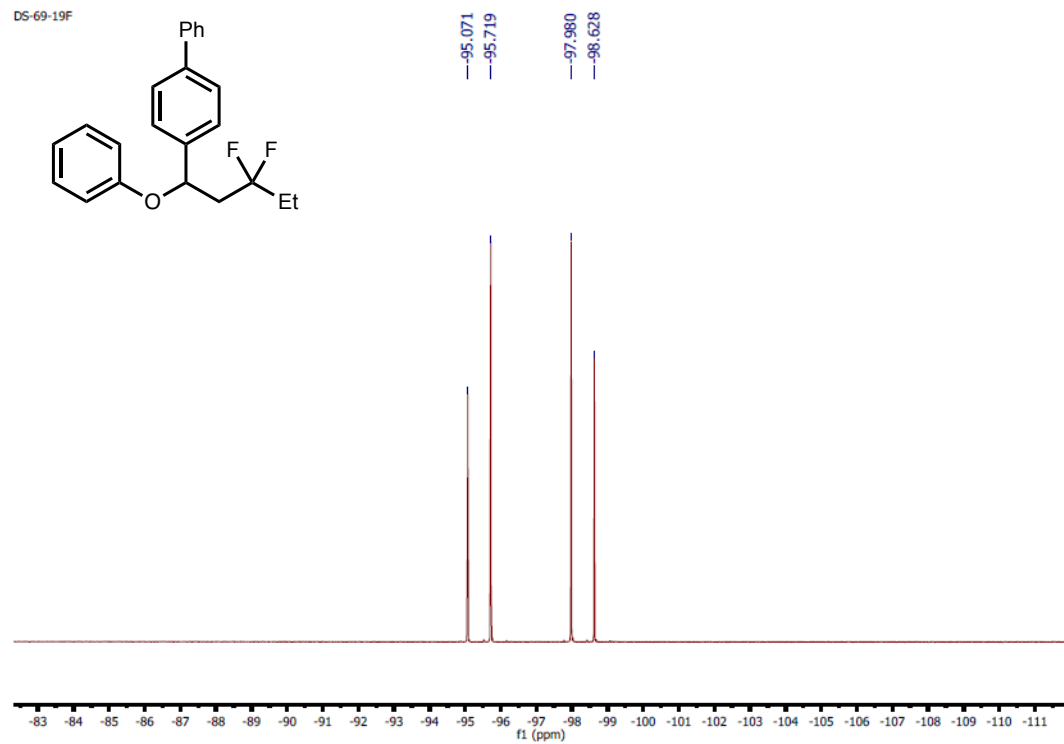

Compound 21. Top:  $^1\text{H}$  NMR ( $\text{CDCl}_3$ , 400 MHz). Bottom:  $^{13}\text{C}$  NMR ( $\text{CDCl}_3$ , 100 MHz)

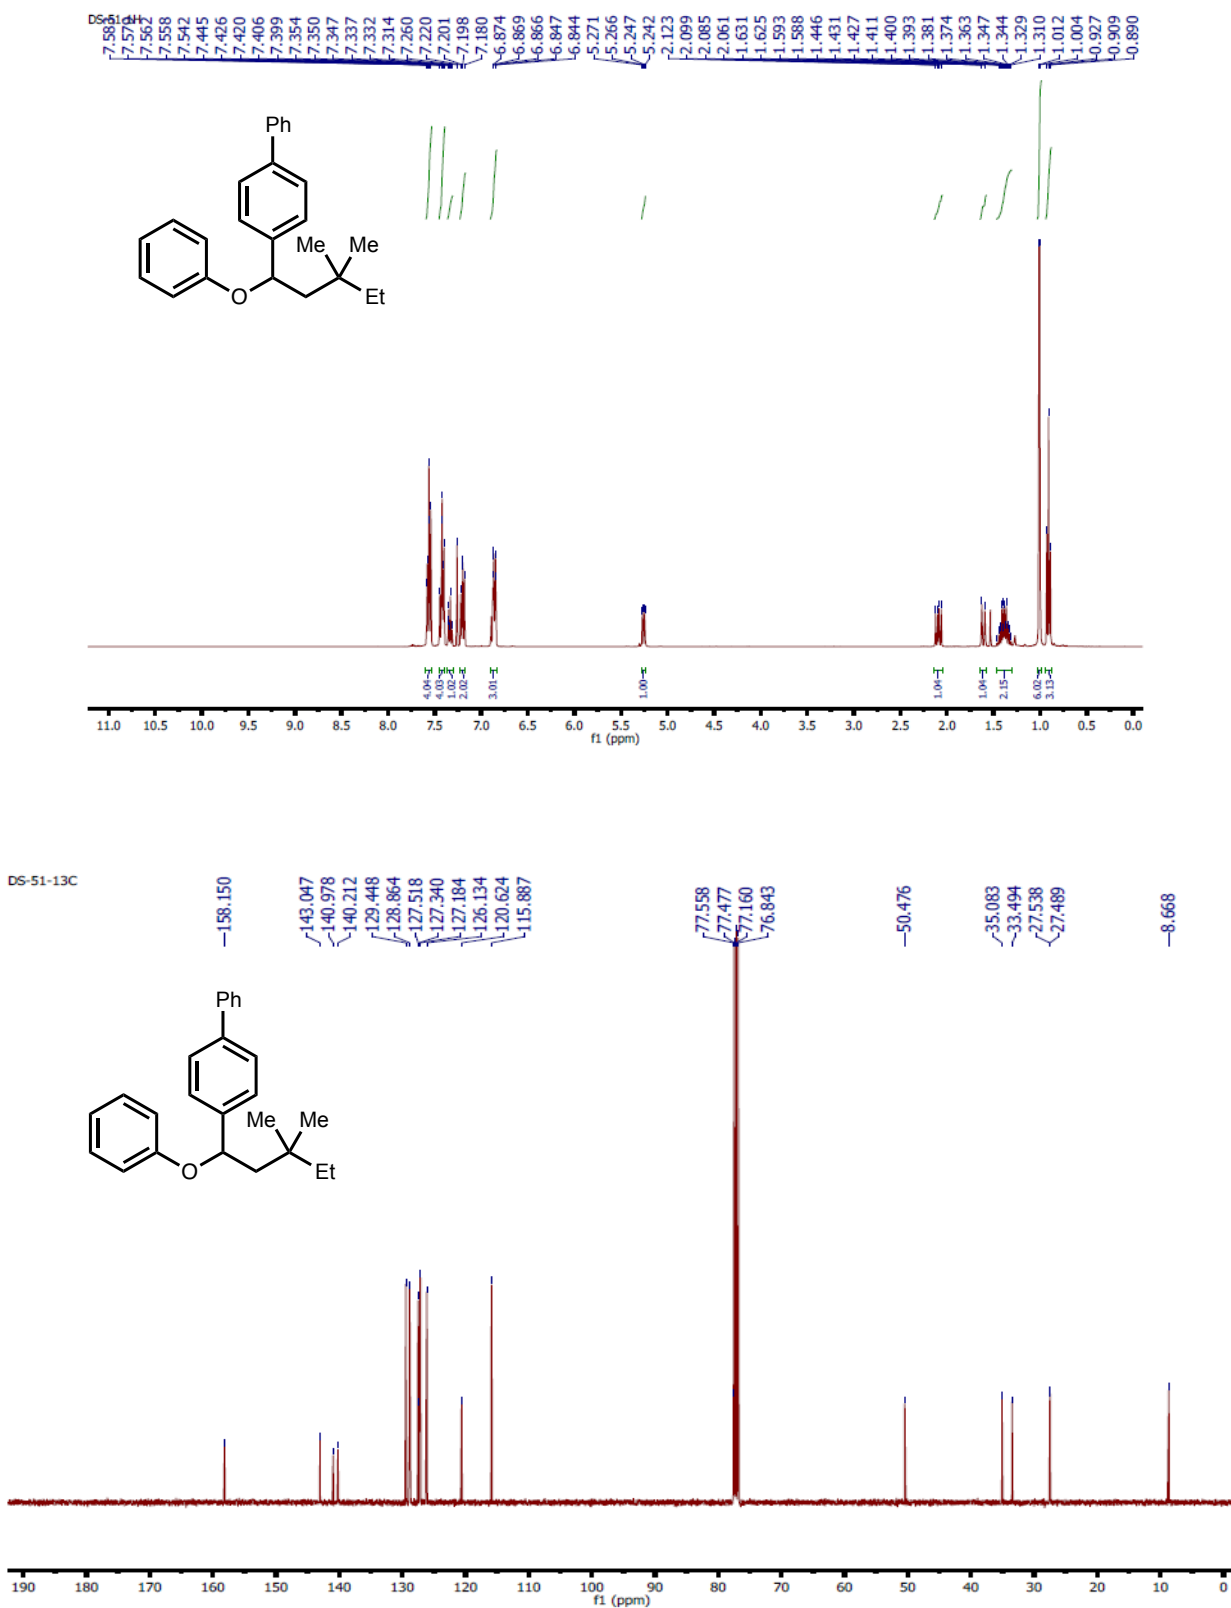

Compound 23. Top:  $^1\text{H}$  NMR ( $\text{CDCl}_3$ , 400 MHz). Bottom:  $^{13}\text{C}$  NMR ( $\text{CDCl}_3$ , 100 MHz)

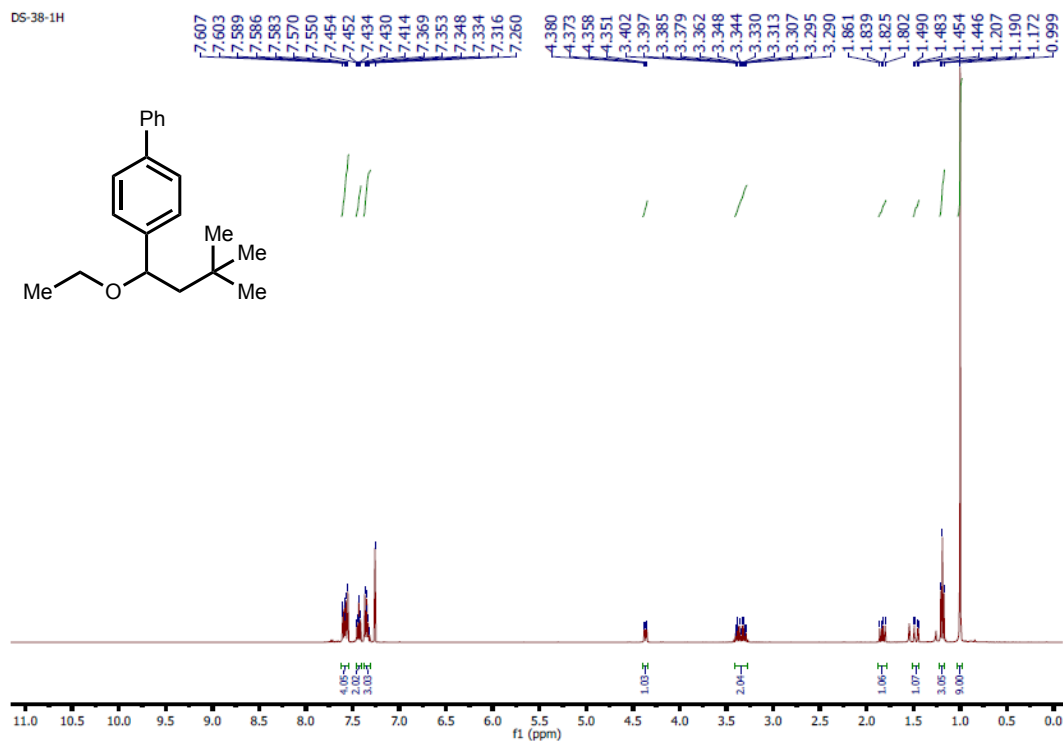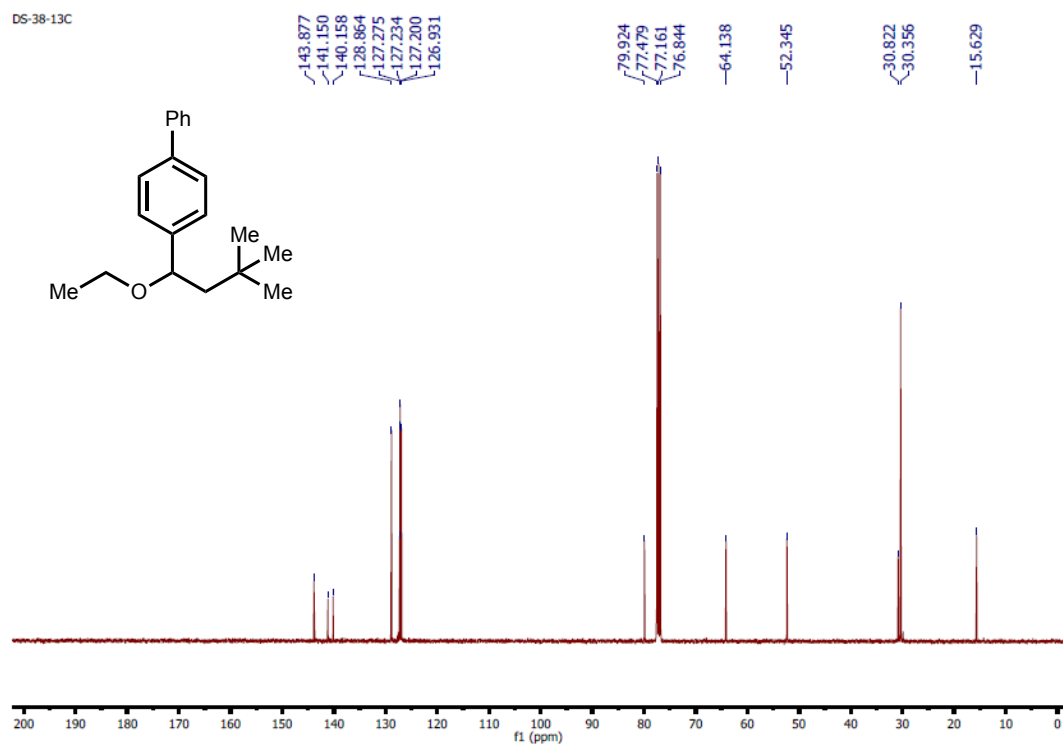

**Compound 24. Top:  $^1\text{H}$  NMR ( $\text{CDCl}_3$ , 400 MHz). Bottom:  $^{13}\text{C}$  NMR ( $\text{CDCl}_3$ , 100 MHz)**

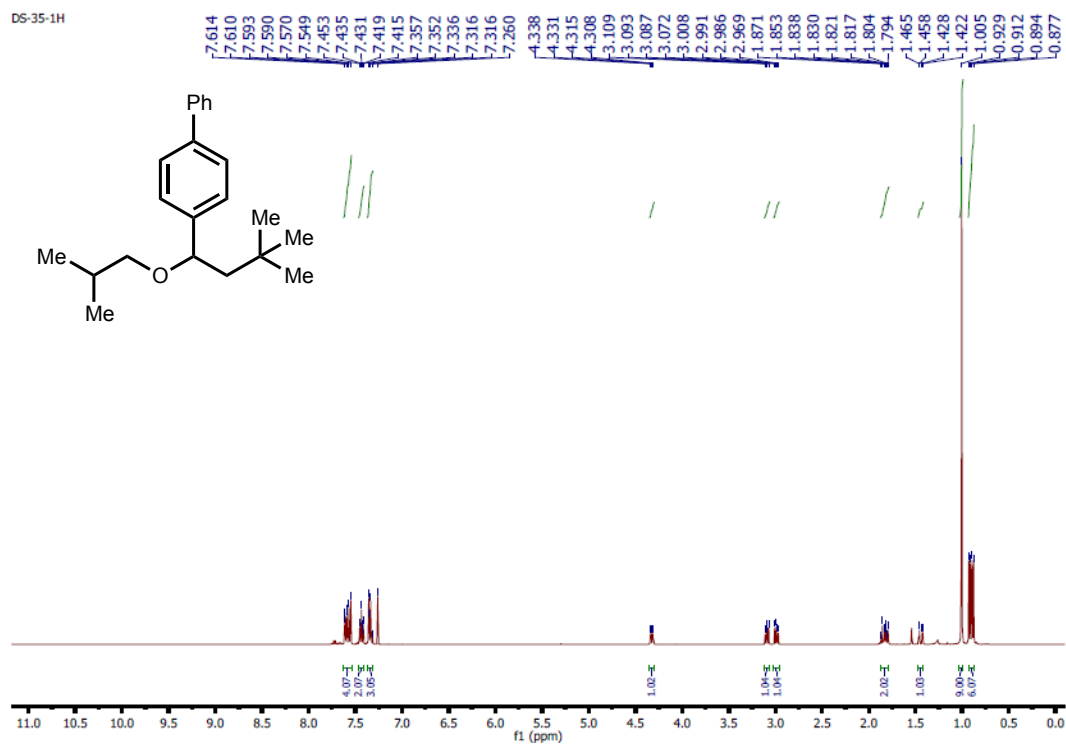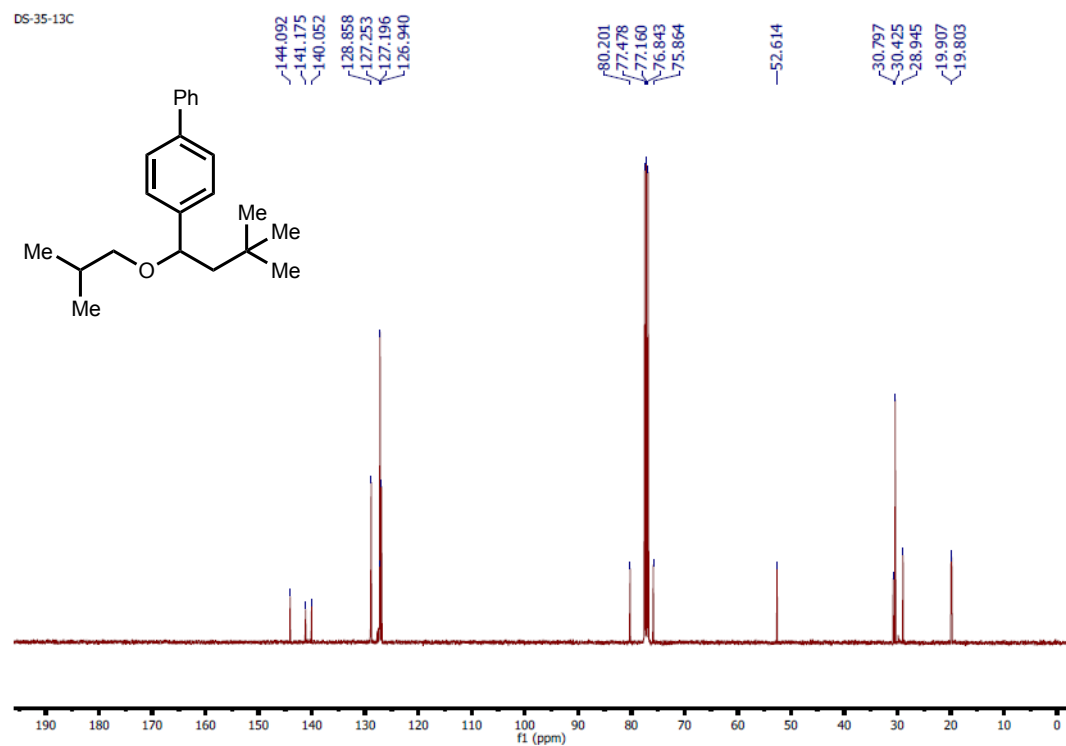

**Compound 25. Top:  $^1\text{H}$  NMR ( $\text{CDCl}_3$ , 400 MHz). Bottom:  $^{13}\text{C}$  NMR ( $\text{CDCl}_3$ , 100 MHz)**

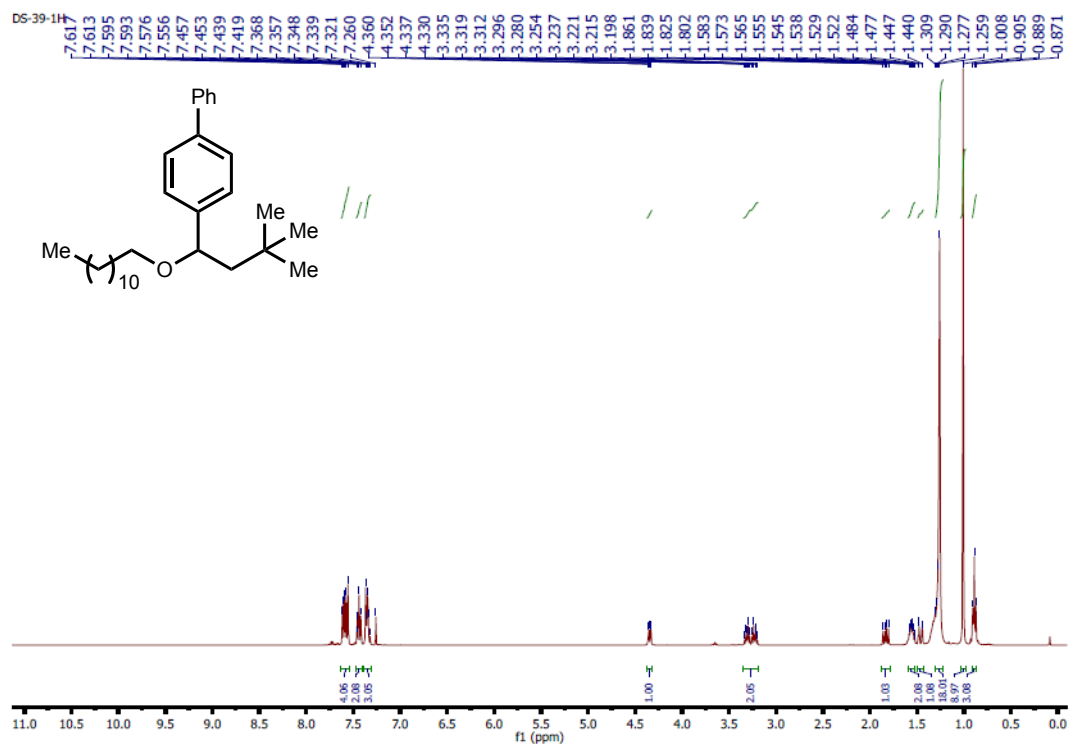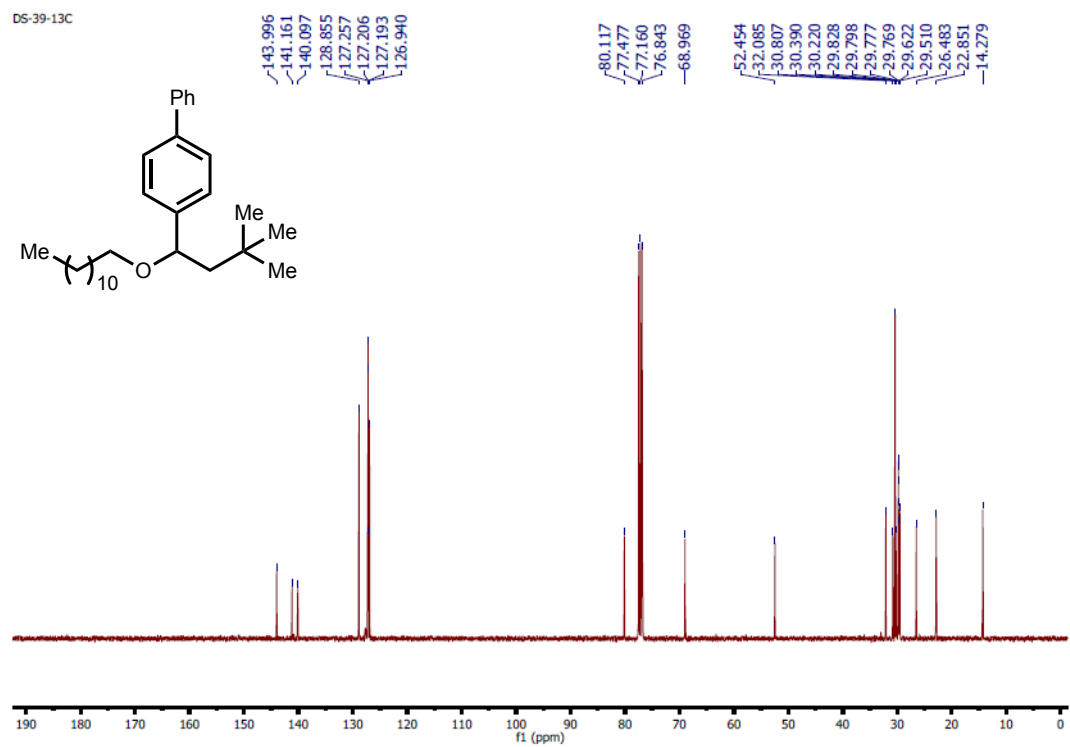

Compound 26. Top:  $^1\text{H}$  NMR ( $\text{CDCl}_3$ , 400 MHz). Bottom:  $^{13}\text{C}$  NMR ( $\text{CDCl}_3$ , 100 MHz)

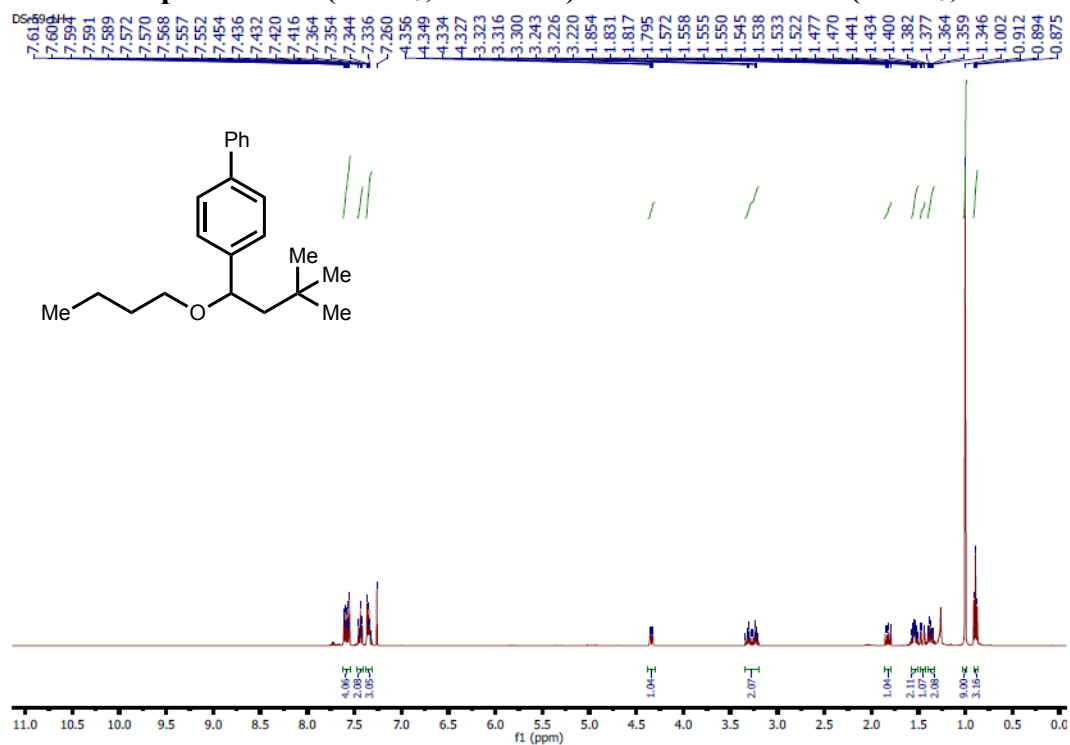

DS-59-13C

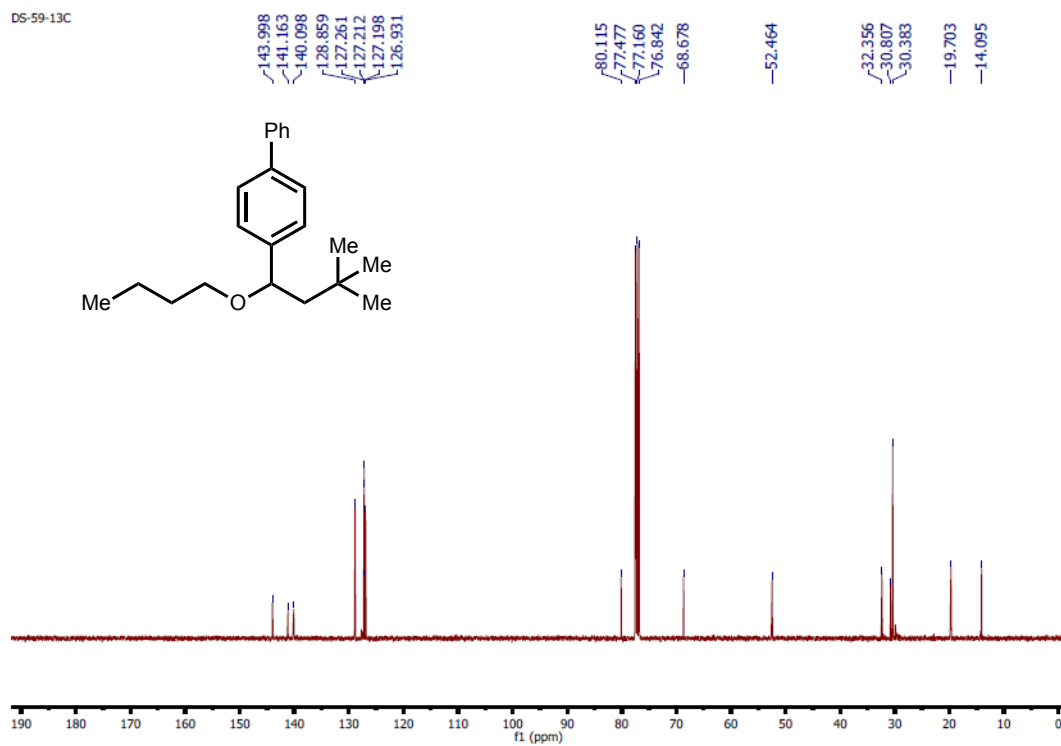

Compound 27. Top:  $^1\text{H}$  NMR ( $\text{CDCl}_3$ , 400 MHz). Bottom:  $^{13}\text{C}$  NMR ( $\text{CDCl}_3$ , 100 MHz)

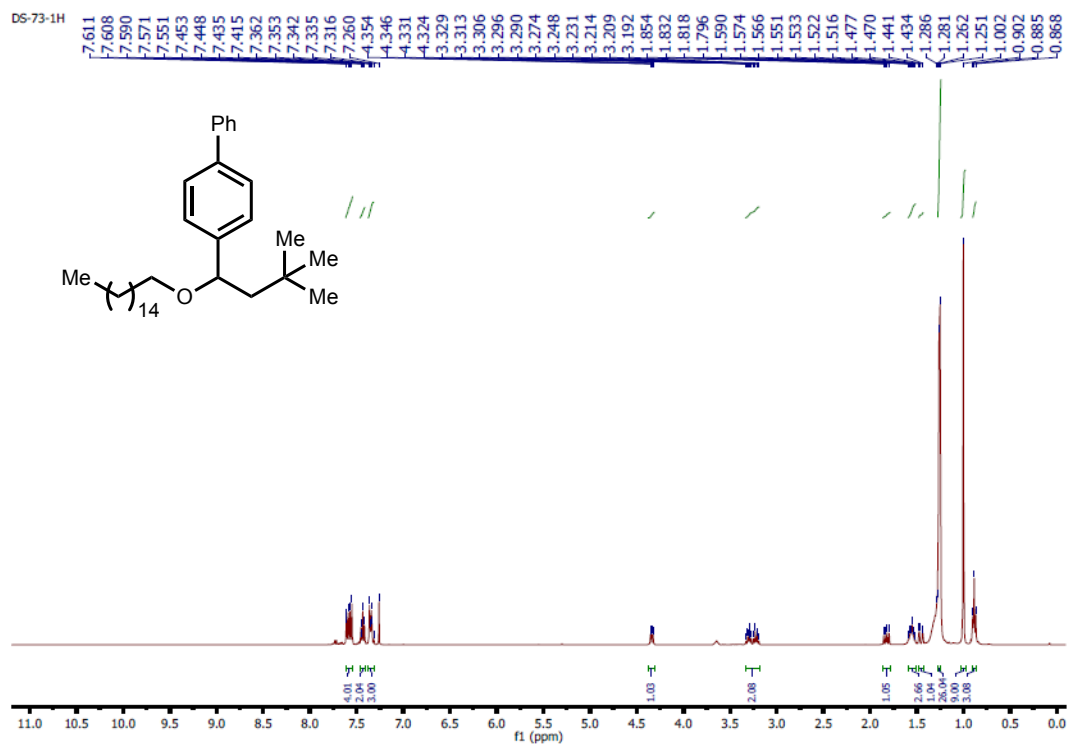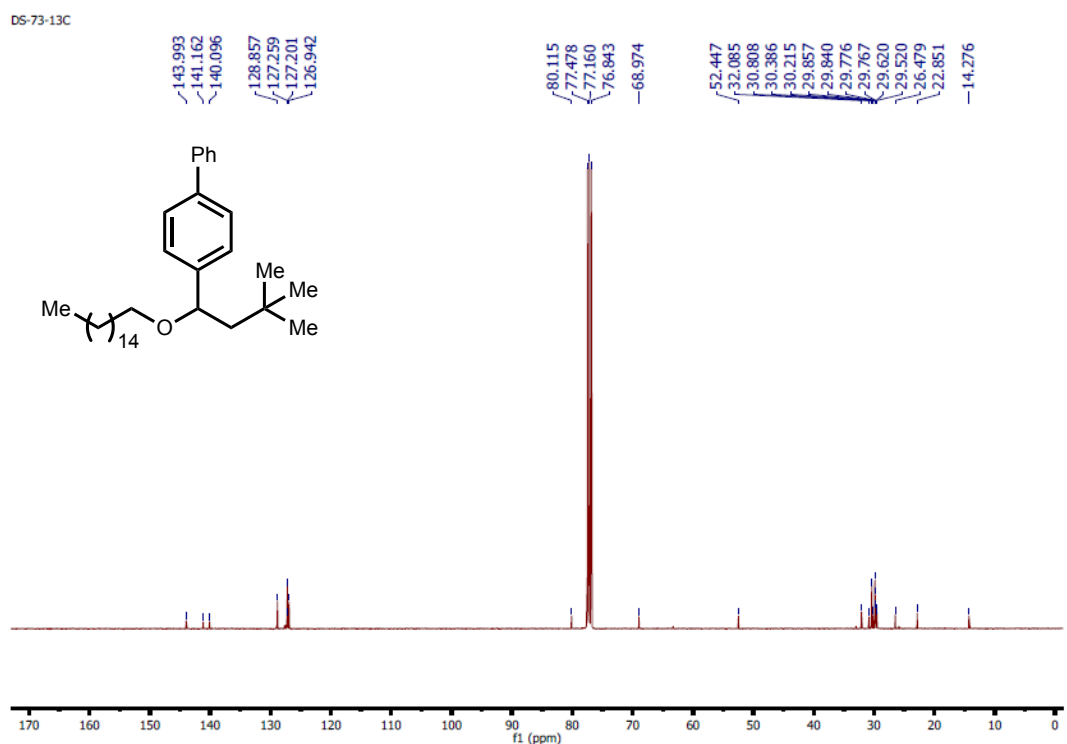



Compound 28. Top:  $^1\text{H}$  NMR ( $\text{CDCl}_3$ , 400 MHz). Bottom:  $^{13}\text{C}$  NMR ( $\text{CDCl}_3$ , 100 MHz)

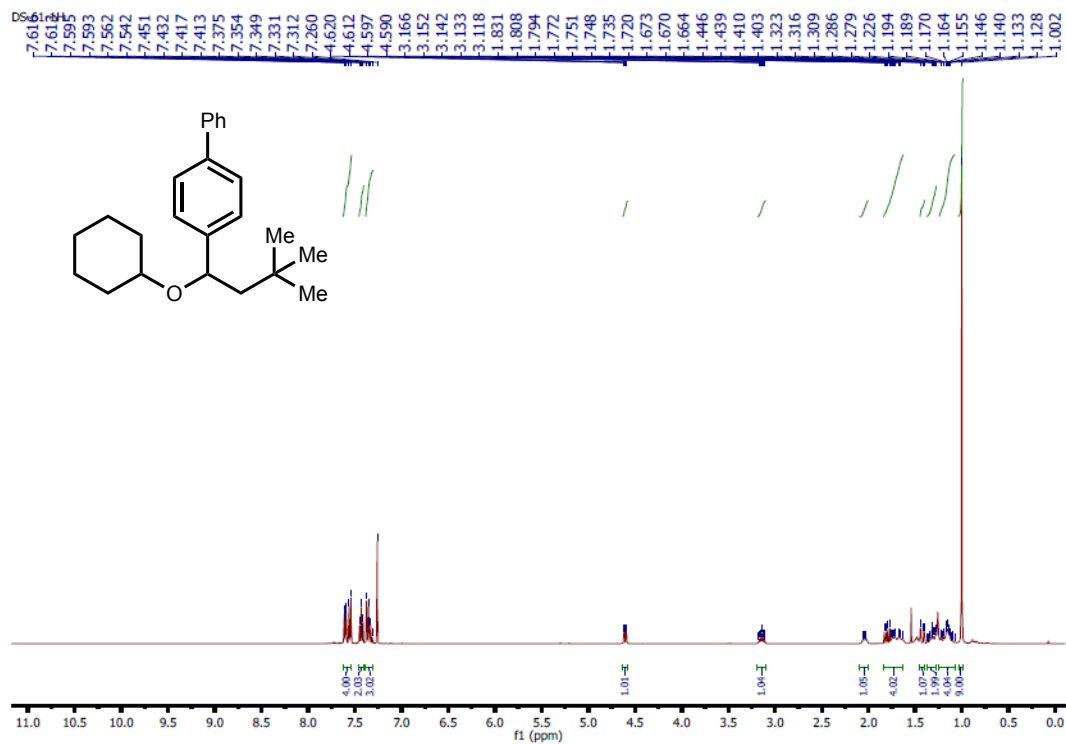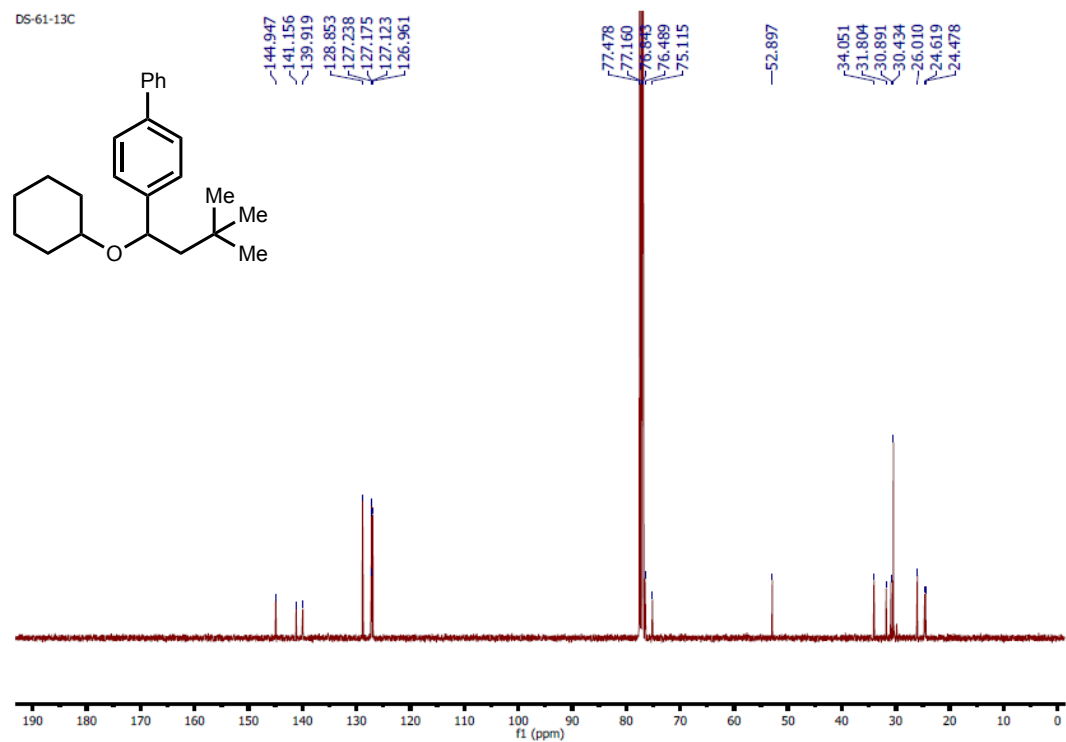

**Compound 29. Top:  $^1\text{H}$  NMR ( $\text{CDCl}_3$ , 400 MHz). Bottom:  $^{13}\text{C}$  NMR ( $\text{CDCl}_3$ , 100 MHz)**

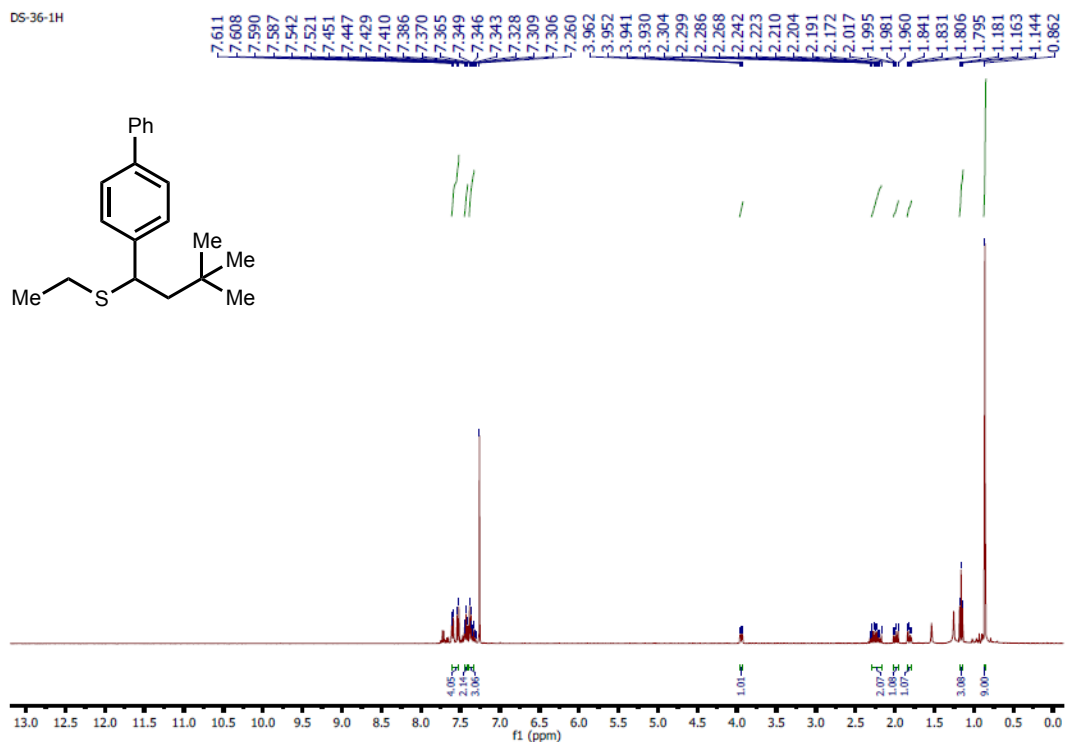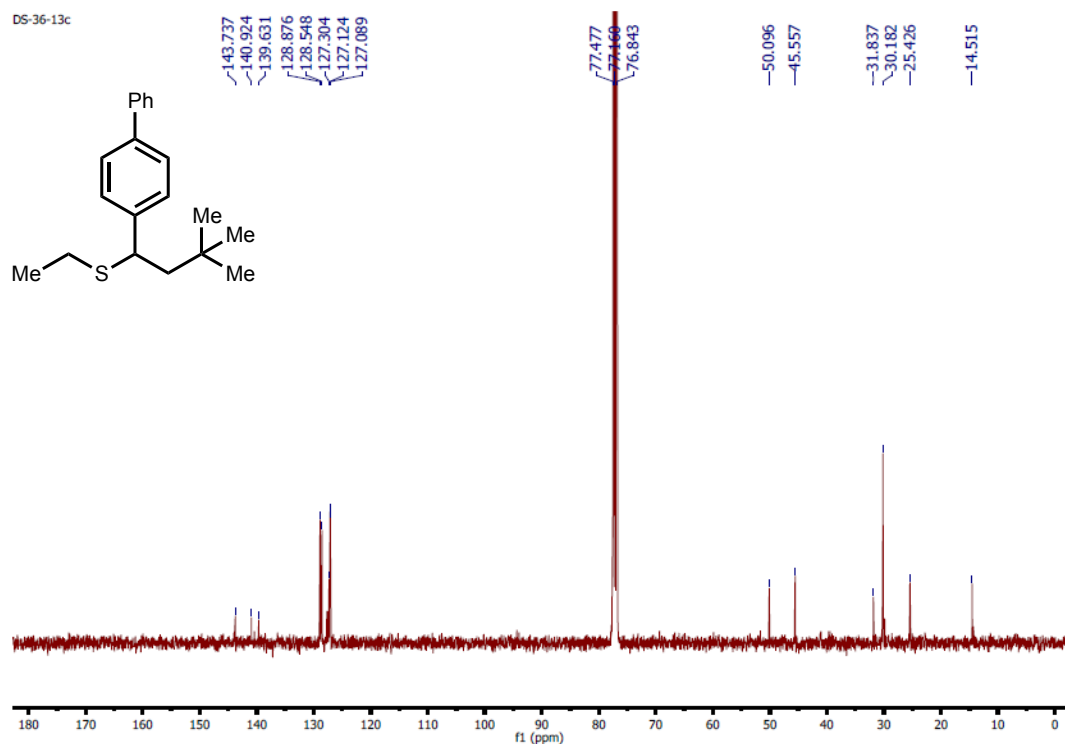

**Compound 30. Top:  $^1\text{H}$  NMR ( $\text{CDCl}_3$ , 400 MHz). Bottom:  $^{13}\text{C}$  NMR ( $\text{CDCl}_3$ , 100 MHz)**

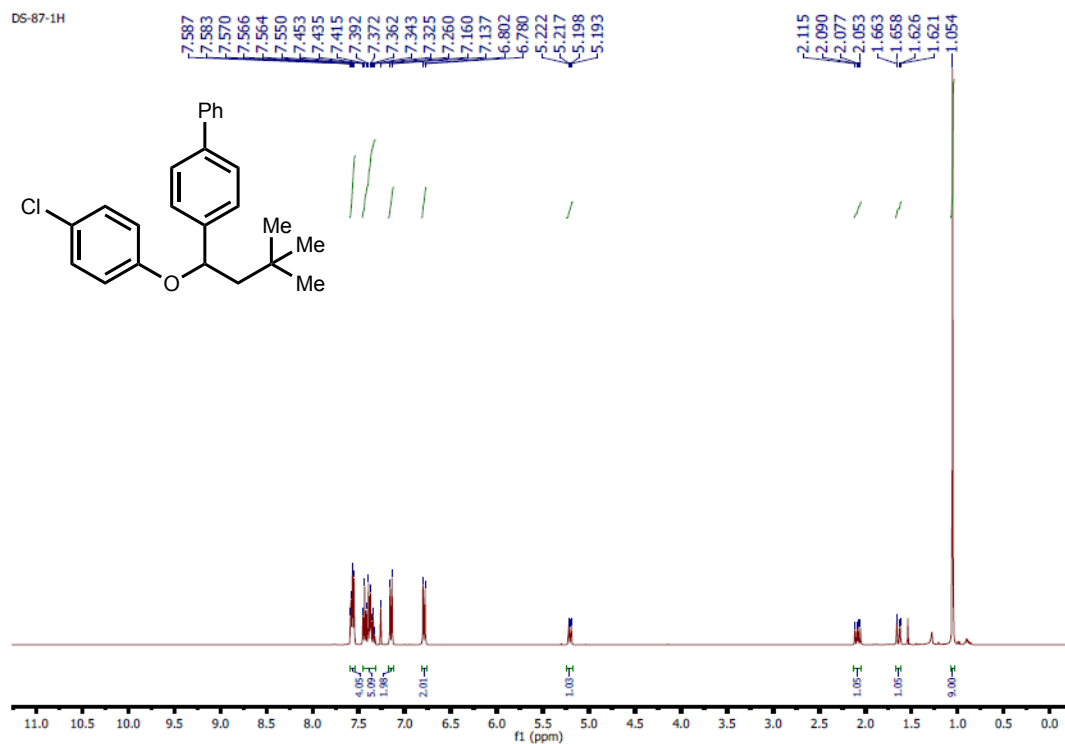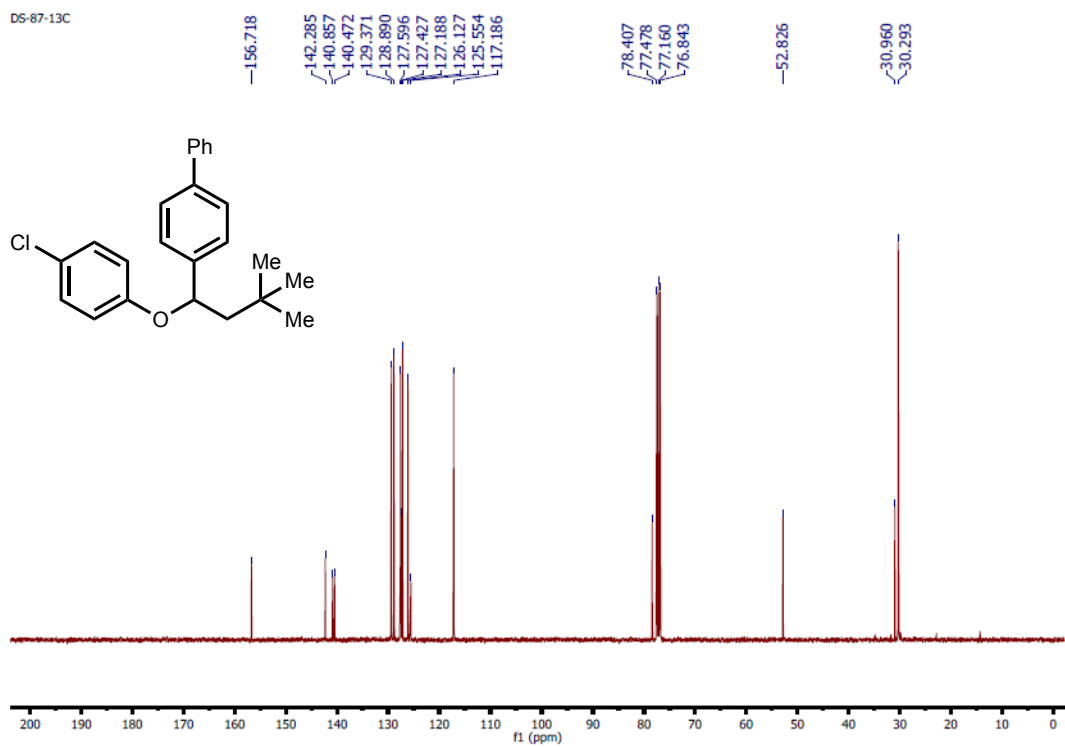

**Compound 31. Top:  $^1\text{H}$  NMR ( $\text{CDCl}_3$ , 400 MHz). Bottom:  $^{13}\text{C}$  NMR ( $\text{CDCl}_3$ , 100 MHz)**

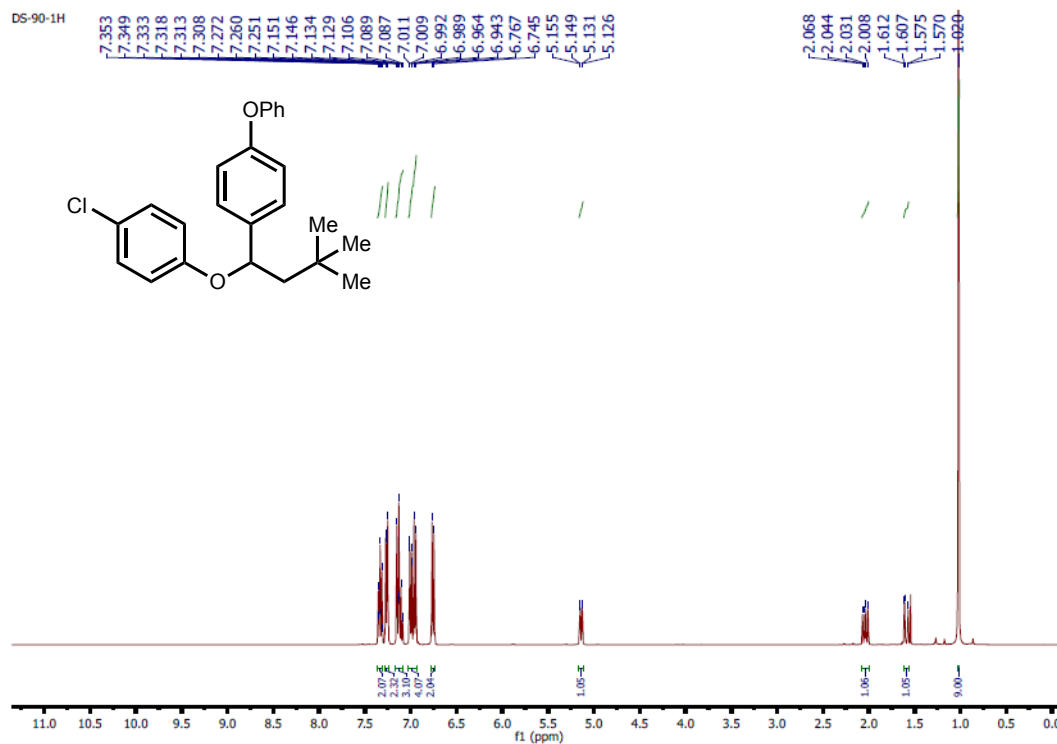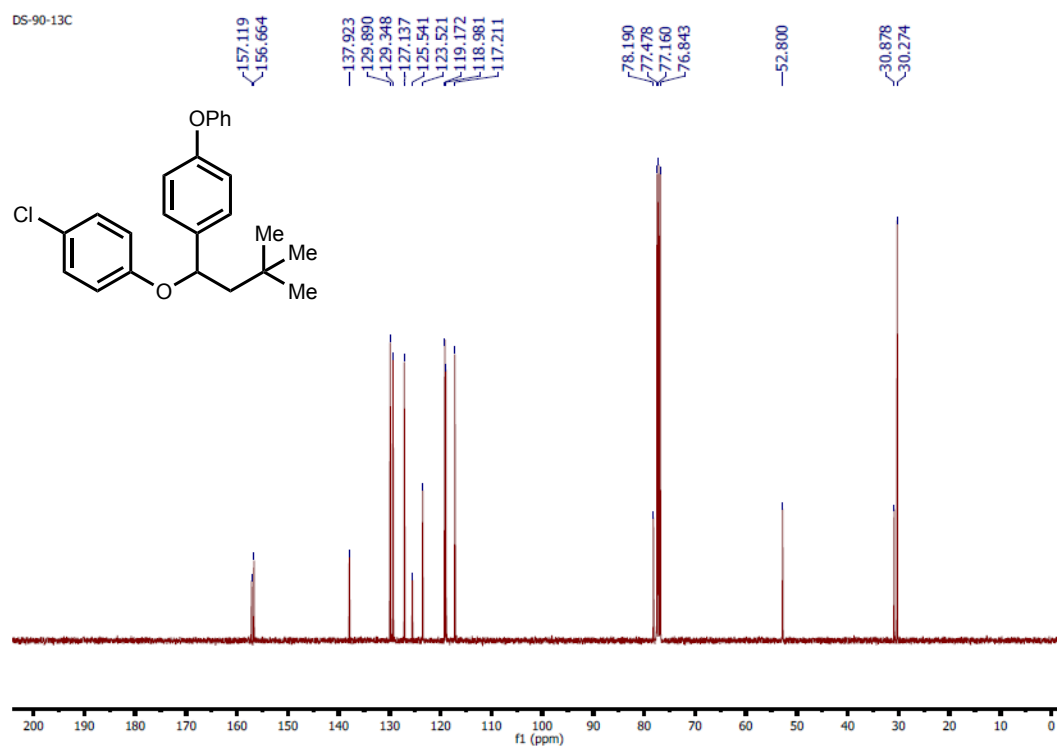

**Compound 32. Top:  $^1\text{H}$  NMR ( $\text{CDCl}_3$ , 400 MHz). Bottom:  $^{13}\text{C}$  NMR ( $\text{CDCl}_3$ , 100 MHz)**

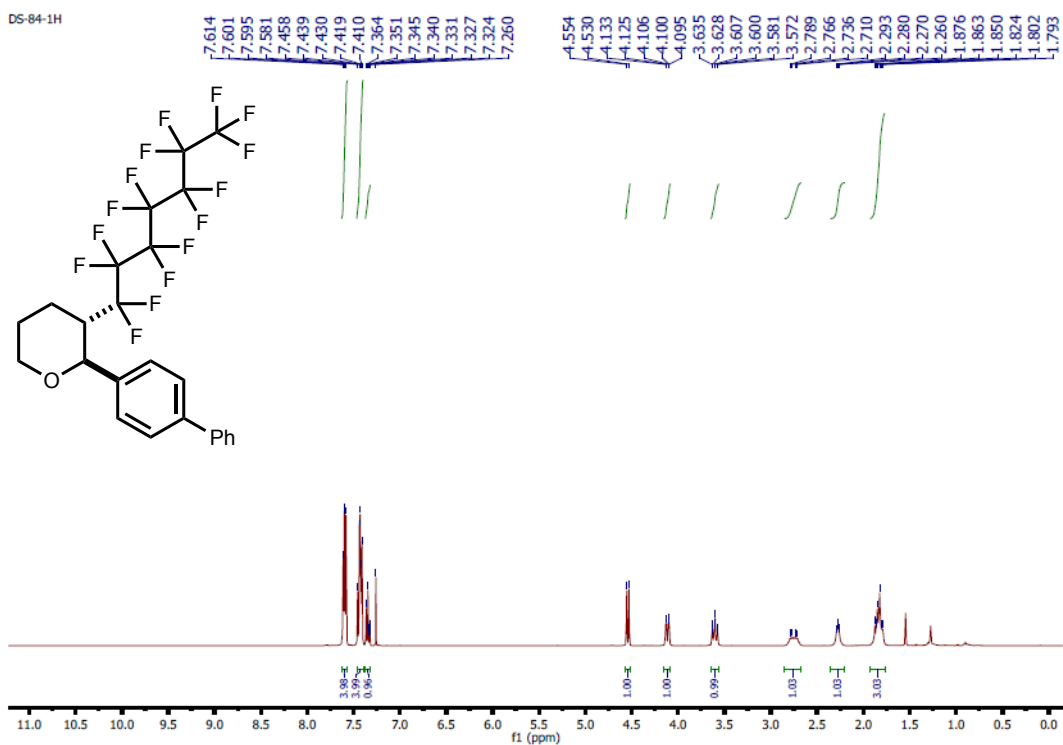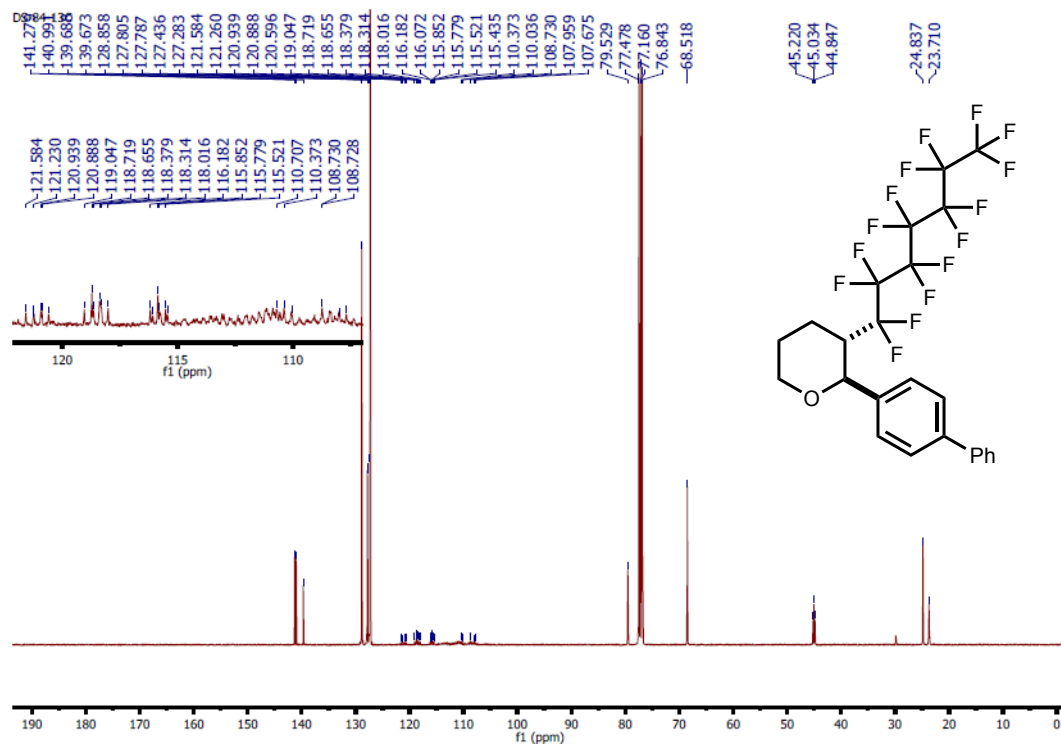

**Compound 32. Top:  $^{19}\text{F}$  NMR ( $\text{CDCl}_3$ , 376 MHz). Bottom: NOESY ( $\text{CDCl}_3$ , 600 MHz)**

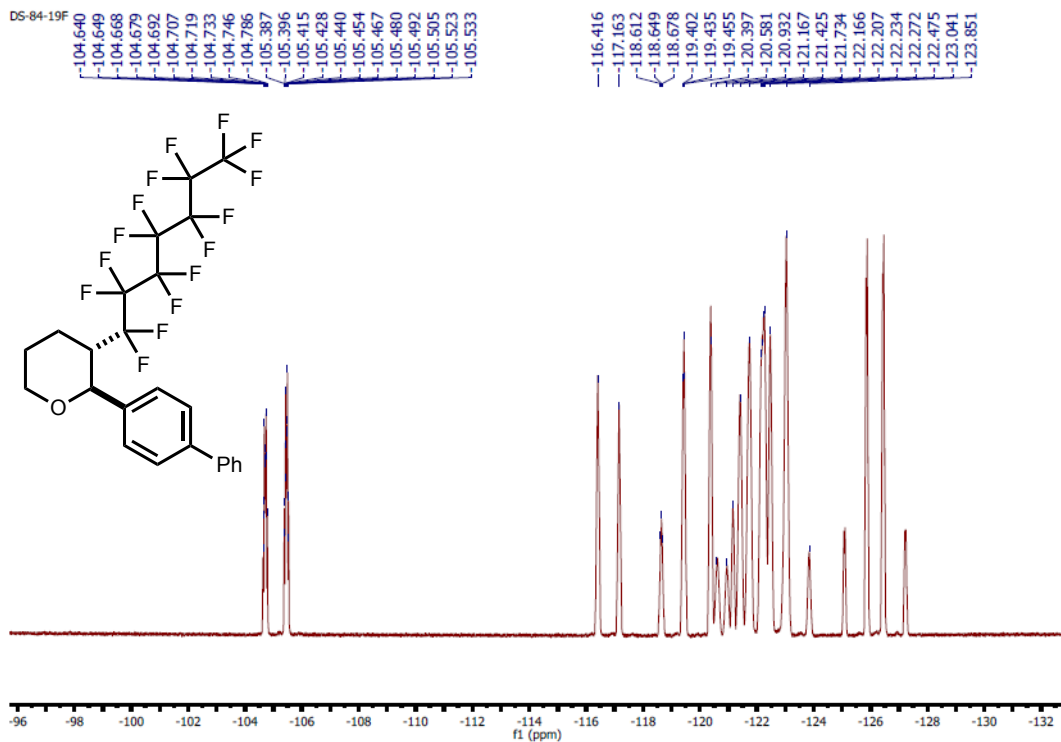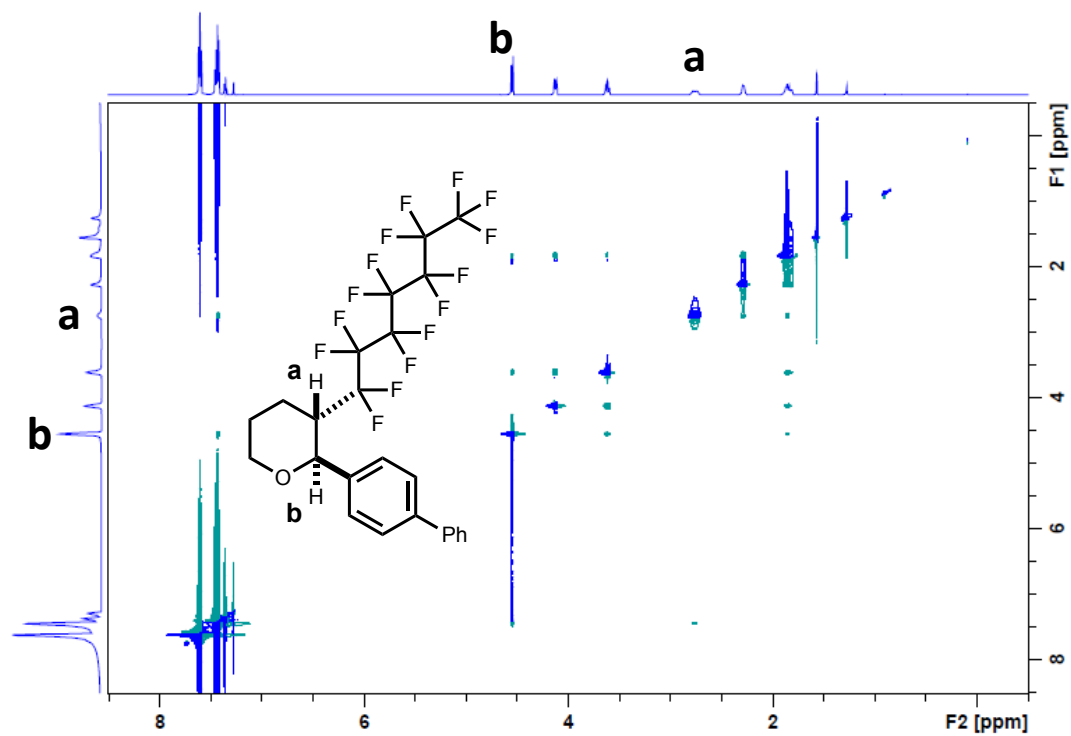

Supplement: d1cc04619e1.pdf [file d1cc04619e1.pdf]
